# Supplementary material for: Functionalisation of esters via 1,3-chelation using NaOtBu: mechanistic investigations and synthetic applications
Source: Royal Society of Chemistry journal article supplement (doi:10.1039/d0qo01135e), 2020-11-03
Supplement: d0qo01135e1.pdf [file d0qo01135e1.pdf]

## Supplementary Information

### Functionalisation of esters via 1,3-chelation using NaOtBu: mechanistic investigations and synthetic applications

Hye Sung Yang,<sup>a</sup> Lingamurthy Macha,<sup>b</sup> Hyun-Joon Ha<sup>\*b</sup> and Jung Woon Yang<sup>\*a</sup>

<sup>a</sup> Department of Energy Science, Sungkyunkwan University, Suwon 16419, Republic of Korea

<sup>b</sup> Department of Chemistry, Hankuk University of Foreign Studies, Yongin 17035, Republic of Korea

E-mail: hjha@hufs.ac.kr (H.-J. Ha); jwyang@skku.edu (J. W. Yang)

### Contents

|                                                                                                      |     |
|------------------------------------------------------------------------------------------------------|-----|
| 1. General information and experimental procedures                                                   | S2  |
| 2. Equivalent screening for transesterification and deesterification                                 | S4  |
| 3. Confirmation of side reaction with enolisable esters                                              | S5  |
| 4. Deuterium-labeling experiment                                                                     | S7  |
| 5. Optimisation of the reaction conditions for <i>N</i> -protected amino acid <i>t</i> -butyl esters | S8  |
| 6. Analytical data of products                                                                       | S9  |
| 7. References                                                                                        | S20 |
| 8. <sup>1</sup> H NMR and <sup>13</sup> C NMR spectra of the products                                | S21 |
| 9. HPLC spectra of <i>N</i> -protected amino acid <i>t</i> -butyl esters                             | S78 |

## General information

Thin-layer chromatography (TLC) was performed on Merck silica gel 60 F254.  $^1\text{H}$  NMR spectra were recorded on a Varian at 500 MHz in  $\text{CDCl}_3$  ( $\delta$  7.26 ppm) or  $\text{DMSO}-d_6$  ( $\delta$  2.50 ppm),  $^{13}\text{C}$  NMR spectral measurements were performed at 126 MHz using  $\text{CDCl}_3$  ( $\delta$  77.16 ppm) or  $\text{DMSO}-d_6$  ( $\delta$  39.52 ppm) or Toluene- $d_8$  ( $\delta$  137.86 ppm). High-resolution mass spectra (HRMS) were obtained on an Agilent 6890 Series and a Bruker Compact mass spectrometer. Infrared (IR) spectra were recorded on a VERTEX 70 (Bruker) IR spectrometer in the range of 1000-4000  $\text{cm}^{-1}$ . HPLC analyses for the enantiomeric excess (*ee*) were performed on YL 9100 HPLC system using the indicated chiral column (4.6 mm x 0.25 mm) column. Melting Point were checked with a M-560 (BUCHI). ReactIR monitoring was performed with Mettler Toledo ReactIR<sup>TM</sup> 45m equipped with DS AgX DiComp<sup>TM</sup> probe. Optical rotation were recorded on JASCO P-2000 polarimeter.

## Experimental Procedures

### General procedure for the synthesis of *t*-butyl ester 2 [Condition A]

To a stirred suspension of NaOtBu (1.25 mmol, 2.5 equiv.) in toluene (2.5 mL), ester **1** (0.5 mmol) was added. The mixture was stirred at room temperature for 3-4 h. The reaction mixture was quenched with 5% HCl solution and extracted with diethyl ether (2 × 10 mL). The combined organic extracts were dried over  $\text{Na}_2\text{SO}_4$ , concentrated under reduced pressure, and purified by column chromatography on silica gel (hexanes/EtOAc) to give the corresponding *t*-butyl ester **2**.

### General procedure for the synthesis of carboxylic acid 3 [Condition B]

To a stirred solution of NaOtBu (1.25 mmol, 2.5 equiv.) in THF (2.5 mL), ester **1** (0.5 mmol) was added. The mixture was stirred at room temperature for 24 h. The reaction mixture was quenched with water and extracted with diethyl ether (2 × 10 mL). The aqueous solution was treated with 5% HCl solution and extracted with diethyl ether (2 × 10 mL). The combined organic extracts were dried over  $\text{Na}_2\text{SO}_4$  and concentrated under reduced pressure to give the corresponding carboxylic acid **3**.

### General procedure for the synthesis of *N*-protected amino acid methyl ester [Condition C]

This general procedure is a slight modification of the procedures available in literature.<sup>1-3</sup>

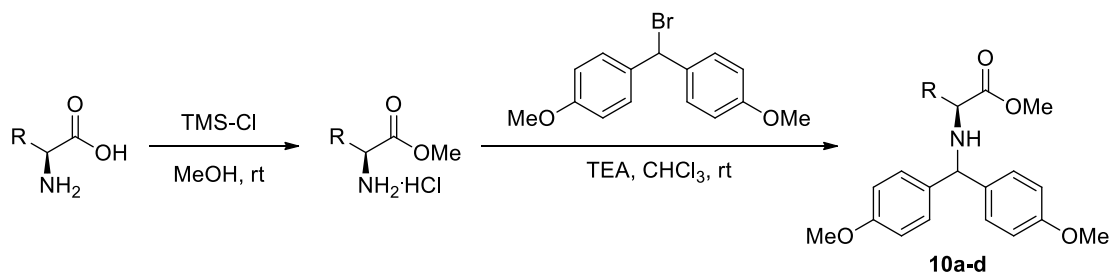

To a stirred solution of L-amino acid (3.0 mmol, 1.0 equiv.) in methanol (3.0 mL), trimethylsilyl chloride (6.0 mmol, 2.0 equiv.) was added at 0 °C and stirred overnight at room temperature. After the reaction reached completion, the volatiles were removed under reduced pressure, and the crude product was used without any further purification. A suspension of L-amino acid methyl ester hydrochloride (3.0 mmol, 1.0 equiv.) in  $\text{CHCl}_3$  (4.5 mL) was treated with triethylamine (6.0 mmol, 2.0 equiv.) at 0 °C. After 5 min, 4,4'-(bromomethylene)bis(methoxybenzene) (3.0 mmol, 1.0 equiv.) was added to the

mixture and stirred overnight at room temperature.  $\text{CHCl}_3$  (4.5 mL) was added to the mixture, and the resulting solution was washed with water ( $2 \times 4.5$  mL), dried over  $\text{Na}_2\text{SO}_4$ , and concentrated under reduced pressure, and purified by column chromatography on silica gel (hexanes / EtOAc) to afford *N*-protected amino acid methyl ester **10**.

#### **General procedure for the synthesis of *N*-protected amino acid *t*-butyl ester [Condition D]**

To a stirred solution of *N*-protected amino acid methyl ester **10** (0.5 mmol, 1.0 equiv.) in  $\text{CH}_2\text{Cl}_2$  (2.5 mL),  $\text{NaOtBu}$  solution dissolved in THF (1.35 mmol, 2.7 equiv.) was added slowly at 0 °C. The mixture was stirred, and the reaction was monitored by TLC. After the reaction reached completion, the mixture was quenched with saturated  $\text{NH}_4\text{Cl}$  solution and  $\text{CH}_2\text{Cl}_2$  ( $2 \times 10$  mL). The combined organic extracts were dried over  $\text{Na}_2\text{SO}_4$ , and concentrated under reduced pressure, and purified by column chromatography on silica gel (hexanes/EtOAc) to afford *N*-protected amino acid *t*-butyl ester **11**.

**Table S1.** Equivalent screening for transesterification.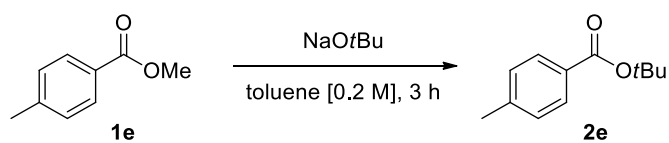

| Entry | Equivalent of NaOtBu | Yield (%) <sup>a</sup> |
|-------|----------------------|------------------------|
| 1     | 2.0                  | 70                     |
| 2     | 2.5                  | 88                     |
| 3     | 3.0                  | 89                     |

<sup>a</sup>All yields are those of isolated products.**Table S2.** Equivalent screening for deesterification.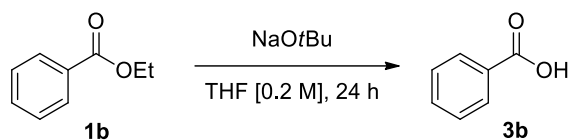

| Entry | Equivalent of NaOtBu | Yield (%) <sup>a</sup> |
|-------|----------------------|------------------------|
| 1     | 2.0                  | 53                     |
| 2     | 2.5                  | 60                     |
| 3     | 3.0                  | 36                     |

<sup>a</sup>All yields are those of isolated products.

## Confirmation of side reaction with enolisable esters

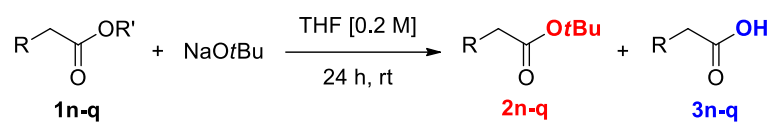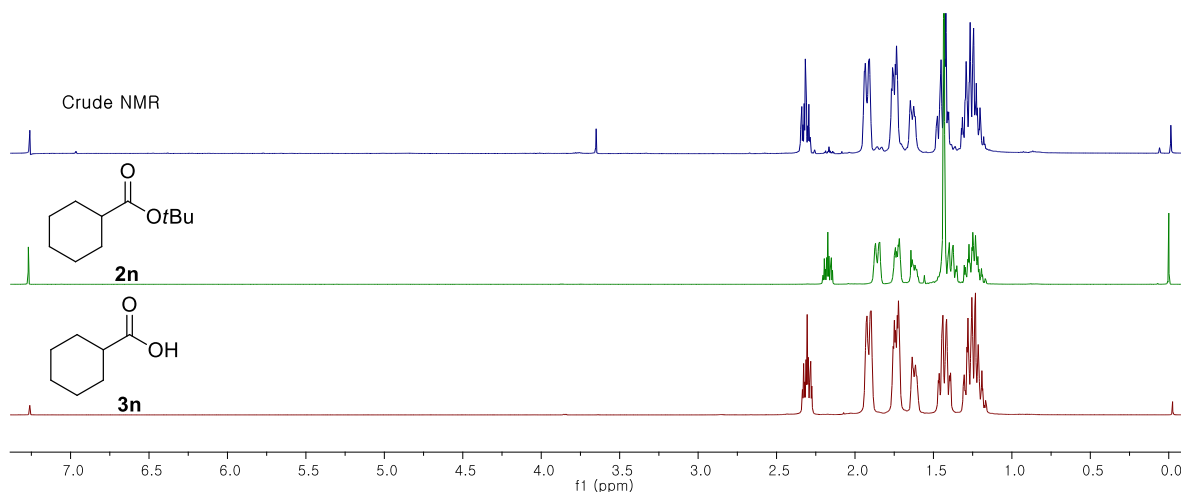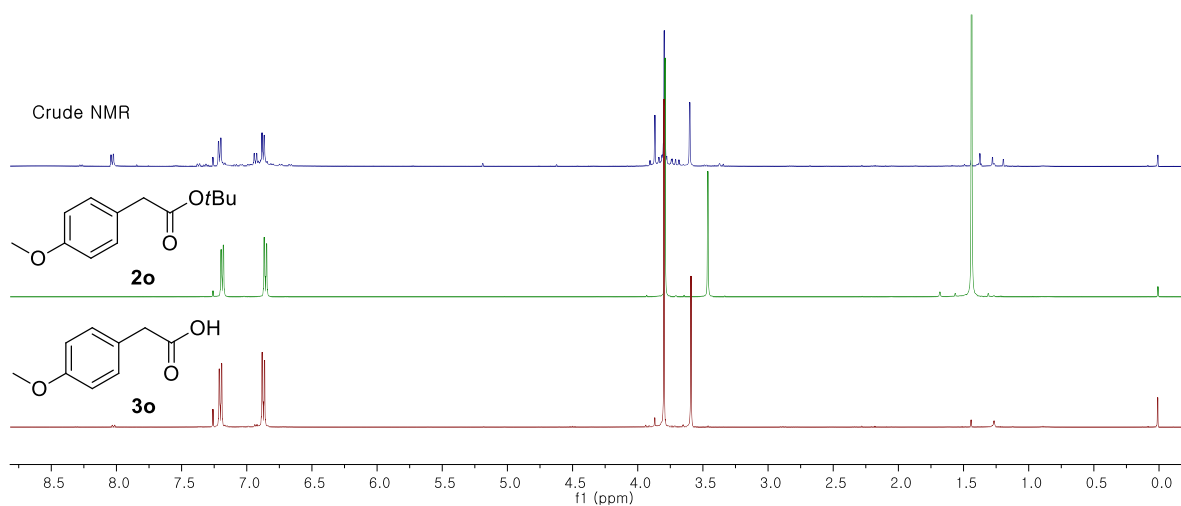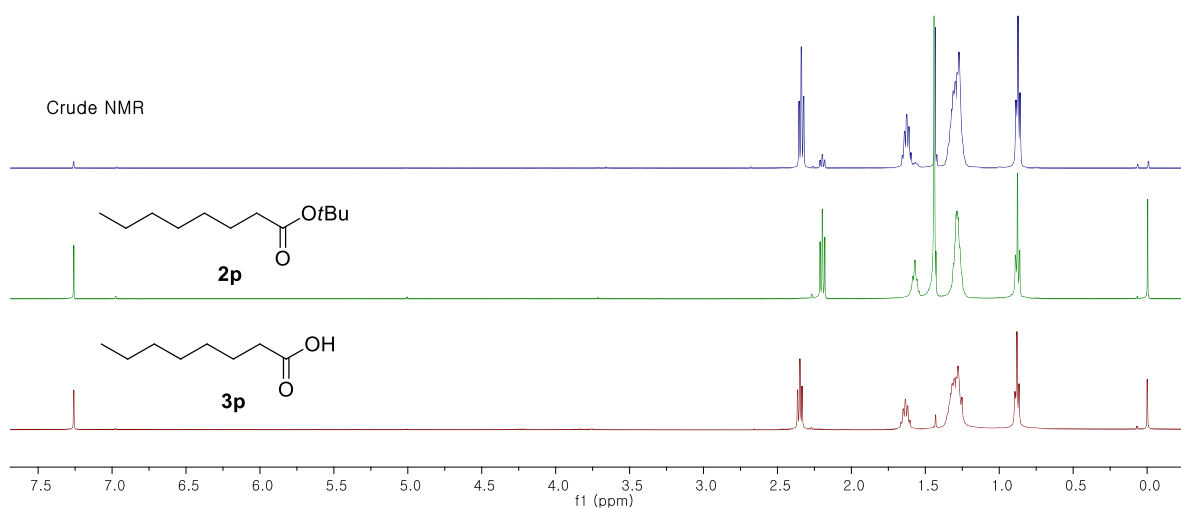

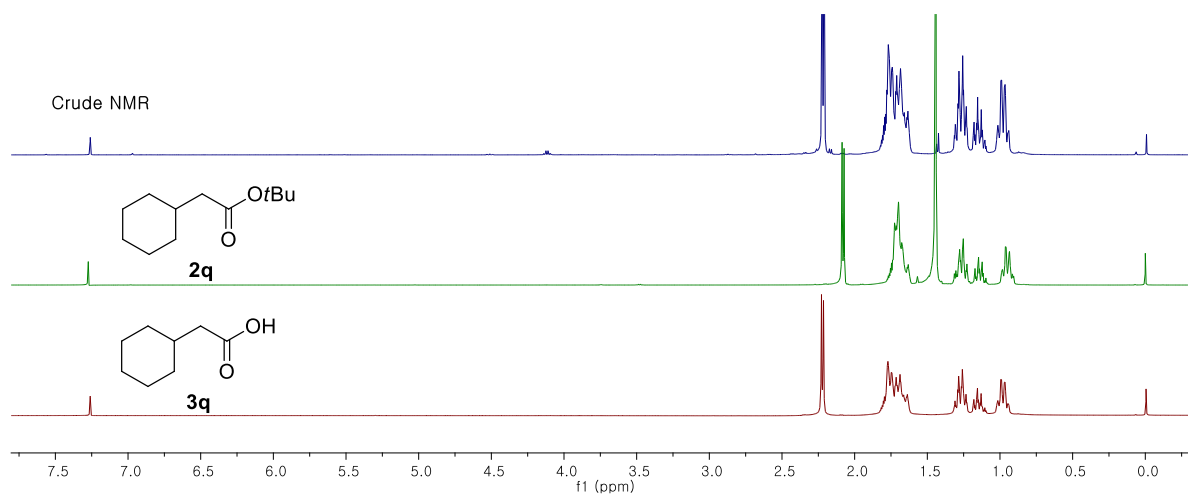

## Deuterium-labeling experiment

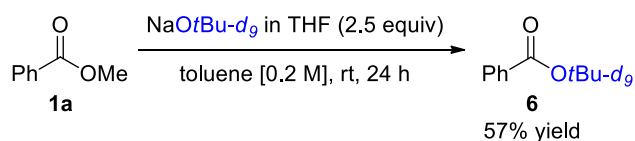

NaH (60% in mineral oil, 1.25 mmol, 2.5 equiv.) was washed with pentane (3 × 2 mL) in a 10 mL round bottom flask. Dry THF (0.625 mL) was added with argon and *t*BuOH-*d*<sub>10</sub> was slowly added to the mixture. After 5 h at room temperature, toluene (2.5 mL) and methyl benzoate (0.5 mmol) were added, and the reaction mixture was stirred for 24 h. The reaction was quenched with 5% HCl solution and extracted with diethyl ether (2 × 10 mL). The combined organic extracts were dried over Na<sub>2</sub>SO<sub>4</sub>, and concentrated under reduced pressure, and purified by column chromatography on silica gel (hexanes/diethyl ether 25:1) to afford the deuterium-incorporated *t*-butyl ester **6** as colorless liquid (57% yield).

<sup>1</sup>H NMR (500 MHz, CDCl<sub>3</sub>) δ 8.00 (d, *J* = 7.9 Hz, 2H), 7.54–7.50 (m, 1H), 7.41 (t, *J* = 7.7 Hz, 2H); <sup>13</sup>C NMR (126 MHz, CDCl<sub>3</sub>) δ 165.9, 132.5, 132.2, 129.5, 128.3, 80.7, 27.3 (dt, *J* = 38.3, 19.3 Hz) ppm; HRMS (EI) *m/z* [M]<sup>+</sup> calcd. for C<sub>11</sub>H<sub>5</sub>D<sub>9</sub>O<sub>2</sub> 187.1559, found 187.1534

**Table S4.** Optimisation of the reaction conditions for *N*-protected amino *tert*-butyl esters

Reaction scheme: c1ccccc1C[C@H](C(=O)OC)NPG >> c1ccccc1C[C@H](C(=O)OC(C)(C)C)NPG

Reagents: NaOtBu, solvent [0.2 M]

PG:

Boc      Trt      Phth      Dpm      Mbh

| Entry     | PG         | Equiv. of NaOtBu        | Solvent          | Temp. (°C) | Yield (%) <sup>a</sup> | ee (%) <sup>b</sup> |
|-----------|------------|-------------------------|------------------|------------|------------------------|---------------------|
| 1         | Boc        | 1.0                     | toluene          | rt         | 7                      | 0                   |
| 2         | Boc        | 1.0                     | toluene          | -15        | 5                      | 9                   |
| 3         | Trt        | 2.5                     | toluene          | rt-50      | n.d                    | n.d                 |
| 4         | Phth       | 2.0                     | toluene          | rt         | 43                     | 0                   |
| 5         | Dpm        | 2.0                     | toluene          | rt         | 13                     | 77                  |
| 6         | Mbh        | 2.0                     | toluene          | rt         | 33                     | 84                  |
| 7         | Mbh        | 2.0                     | THF              | rt         | 28                     | 0                   |
| 8         | Mbh        | 2.5                     | <i>p</i> -xylene | rt         | 42                     | 74                  |
| 9         | Mbh        | 2.5                     | cyclohexane      | rt         | 60                     | 41                  |
| 10        | Mbh        | 2.5                     | benzene          | rt         | 55                     | 70                  |
| 11        | Mbh        | 2.5                     | diethyl ether    | rt         | 41                     | 21                  |
| 12        | Mbh        | 2.5                     | DCM              | rt         | 27                     | 92                  |
| 13        | Mbh        | 2.5                     | DCM              | 40         | 70                     | 73                  |
| 14        | Mbh        | 2.5 (2 M in THF)        | DCM              | rt         | 91                     | 80                  |
| 15        | Mbh        | 2.0 (2 M in THF)        | DCM              | rt         | 71                     | 87                  |
| 16        | Mbh        | 2.5 (2 M in THF)        | DCM              | 0          | 84                     | 92                  |
| <b>17</b> | <b>Mbh</b> | <b>2.7 (2 M in THF)</b> | <b>DCM</b>       | <b>0</b>   | <b>86</b>              | <b>94</b>           |

<sup>a</sup>All yields are those of isolated products. <sup>b</sup>The enantiomeric excess (*ee*) was determined by HPLC analysis.

## Analytical data of products

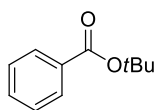

**2a-2d** *tert*-Butyl benzoate (**2a-2d**), The title compound was synthesized according to general procedure A. Colorless liquid; Yield = 37-99%;  $^1\text{H}$  NMR (500 MHz,  $\text{CDCl}_3$ )  $\delta$  8.00 (dd,  $J = 8.3, 1.3$  Hz, 2H), 7.56–7.49 (m, 1H), 7.45–7.38 (m, 2H), 1.60 (s, 9H);  $^{13}\text{C}$  NMR (126 MHz,  $\text{CDCl}_3$ )  $\delta$  165.9, 132.5, 132.2, 129.5, 128.3, 81.1, 28.3 ppm. These data were consistent with those reported in the literature.<sup>4</sup>

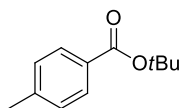

**2e** *tert*-Butyl 4-methylbenzoate (**2e**), The title compound was synthesized according to general procedure A. Colorless liquid; Yield = 88%;  $^1\text{H}$  NMR (500 MHz,  $\text{CDCl}_3$ )  $\delta$  7.89 (d,  $J = 8.2$  Hz, 2H), 7.20 (d,  $J = 8.0$  Hz, 2H), 2.39 (s, 3H), 1.59 (s, 9H);  $^{13}\text{C}$  NMR (126 MHz,  $\text{CDCl}_3$ )  $\delta$  165.9, 143.0, 129.5, 129.4, 128.9, 80.7, 28.3, 21.7 ppm. These data were consistent with those reported in the literature.<sup>4</sup>

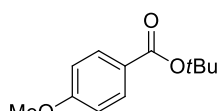

**2f** *tert*-Butyl 4-methoxybenzoate (**2f**), The title compound was synthesized according to general procedure A. Colorless liquid; Yield = 88%;  $^1\text{H}$  NMR (500 MHz,  $\text{CDCl}_3$ )  $\delta$  8.01–7.89 (m, 2H), 6.95–6.84 (m, 2H), 3.84 (s, 3H), 1.58 (s, 9H);  $^{13}\text{C}$  NMR (126 MHz,  $\text{CDCl}_3$ )  $\delta$  165.7, 163.1, 131.5, 124.6, 113.5, 80.6, 55.5, 28.4 ppm. These data were consistent with those reported in the literature.<sup>4</sup>

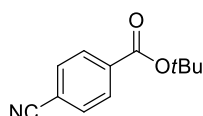

**2g** *tert*-Butyl 4-cyanobenzoate (**2g**), The title compound was synthesized according to general procedure A. Colorless liquid; Yield = 99%;  $^1\text{H}$  NMR (500 MHz,  $\text{CDCl}_3$ )  $\delta$  8.17–7.91 (m, 2H), 7.84–7.57 (m, 2H), 1.58 (s, 9H);  $^{13}\text{C}$  NMR (126 MHz,  $\text{CDCl}_3$ )  $\delta$  164.0, 135.9, 132.1, 129.9, 118.2, 115.9, 82.4, 28.0 ppm. These data were consistent with those reported in the literature.<sup>5</sup>

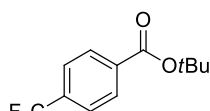

**2h** *tert*-Butyl 4-(trifluoromethyl)benzoate (**2h**), The title compound was synthesized according to general procedure A. Colorless liquid; Yield = 98%;  $^1\text{H}$  NMR (500 MHz,  $\text{CDCl}_3$ )  $\delta$  8.09 (d,  $J = 8.2$  Hz, 2H), 7.67 (d,  $J = 8.2$  Hz, 2H), 1.61 (s, 9H);  $^{13}\text{C}$  NMR (126 MHz,  $\text{CDCl}_3$ )  $\delta$  164.6, 135.4, 134.1 (q,  $J_{\text{C-F}} = 32.5$  Hz), 129.9, 125.3 (q,  $J_{\text{C-F}} = 3.7$  Hz), 123.9 (d,  $J_{\text{C-F}} = 272.6$  Hz);  $^{19}\text{F}$  NMR (471 MHz,  $\text{CDCl}_3$ )  $\delta$  -63.1 ppm. These data were consistent with those reported in the literature.<sup>6</sup>

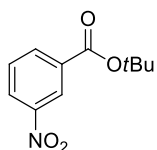

**2i** *tert*-Butyl 3-nitrobenzoate (**2i**), The title compound was synthesized according to general procedure A. Yellow solid; Yield = 62%;  $^1\text{H}$  NMR (500 MHz,  $\text{CDCl}_3$ )  $\delta$  8.81–8.73 (m, 1H), 8.36 (ddd,

$J = 8.2, 2.2, 1.0$  Hz, 1H), 8.30 (dt,  $J = 7.7, 1.2$  Hz, 1H), 7.61 (t,  $J = 8.0$  Hz, 1H), 1.62 (s, 9H);  $^{13}\text{C}$  NMR (126 MHz,  $\text{CDCl}_3$ )  $\delta$  163.6, 148.3, 135.3, 133.9, 129.5, 127.0, 124.5, 82.7, 28.2 ppm. These data were consistent with those reported in the literature.<sup>7</sup>

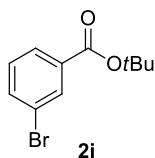

**tert-Butyl 3-bromobenzoate (2j)**, The title compound was synthesized according to general procedure A. Colorless liquid; Yield = 97%;  $^1\text{H}$  NMR (500 MHz,  $\text{CDCl}_3$ )  $\delta$  8.11 (t,  $J = 1.7$  Hz, 1H), 8.01 – 7.83 (m, 1H), 7.63 (ddd,  $J = 8.0, 2.0, 1.0$  Hz, 1H), 7.28 (t,  $J = 7.9$  Hz, 1H), 1.59 (s, 9H);  $^{13}\text{C}$  NMR (126 MHz,  $\text{CDCl}_3$ )  $\delta$  164.4, 135.4, 134.1, 132.5, 129.8, 128.1, 122.4, 81.8, 28.2 ppm. These data were consistent with those reported in the literature.<sup>4</sup>

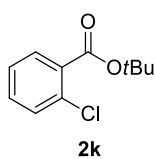

**tert-Butyl 2-chlorobenzoate (2k)**, The title compound was synthesized according to general procedure A. Colorless liquid; Yield = 95%;  $^1\text{H}$  NMR (500 MHz,  $\text{CDCl}_3$ )  $\delta$  7.72 (dd,  $J = 7.7, 1.5$  Hz, 1H), 7.38 (dtd,  $J = 9.5, 8.0, 1.3$  Hz, 2H), 7.28 (dd,  $J = 10.6, 4.2$  Hz, 1H), 1.61 (s, 9H);  $^{13}\text{C}$  NMR (126 MHz,  $\text{CDCl}_3$ )  $\delta$  165.3, 133.1, 132.3, 131.9, 131.0, 130.9, 126.6, 82.5, 28.3 ppm. These data were consistent with those reported in the literature.<sup>8</sup>

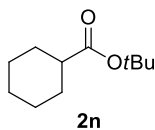

**tert-Butyl cyclohexanecarboxylate (2n)**, The title compound was synthesized according to general procedure A. Colorless liquid; Yield = 92%;  $^1\text{H}$  NMR (500 MHz,  $\text{CDCl}_3$ )  $\delta$  2.16 (tt,  $J = 11.2, 3.6$  Hz, 1H), 1.91–1.80 (m, 2H), 1.77–1.68 (m, 2H), 1.66–1.57 (m, 1H), 1.44 (s, 9H), 1.42–1.32 (m, 2H), 1.31–1.14 (m, 3H);  $^{13}\text{C}$  NMR (126 MHz,  $\text{CDCl}_3$ )  $\delta$  175.8, 79.7, 44.3, 29.2, 28.2, 26.0, 25.6 ppm. These data were consistent with those reported in the literature.<sup>4</sup>

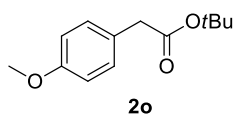

**tert-Butyl 2-(4-methoxyphenyl)acetate (2o)**, The title compound was synthesized according to general procedure A. Colorless liquid; Yield = 61%;  $^1\text{H}$  NMR (500 MHz,  $\text{CDCl}_3$ )  $\delta$  7.19 (d,  $J = 8.5$  Hz, 2H), 6.86 (d,  $J = 8.6$  Hz, 2H), 3.79 (s, 3H), 3.46 (s, 2H), 1.44 (s, 9H);  $^{13}\text{C}$  NMR (126 MHz,  $\text{CDCl}_3$ )  $\delta$  171.4, 158.7, 130.3, 127.0, 114.0, 80.8, 55.3, 41.8, 28.2 ppm. These data were consistent with those reported in the literature.<sup>9</sup>

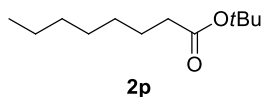

**tert-Butyl octanoate (2p)**, The title compound was synthesized according to general procedure A. Yellow liquid; Yield = 99%;  $^1\text{H}$  NMR (500 MHz,  $\text{CDCl}_3$ )  $\delta$  2.20 (t,  $J = 7.5$  Hz, 2H), 1.61–1.53 (m, 2H), 1.44 (s, 9H), 1.34–1.23 (m, 8H), 0.88 (t,  $J = 7.0$  Hz, 3H);  $^{13}\text{C}$  NMR (126 MHz,  $\text{CDCl}_3$ )  $\delta$  173.5, 80.0, 35.8, 31.8, 29.2, 29.1, 28.3, 25.3, 22.8, 14.2 ppm. These data were consistent with those reported in the literature.<sup>10</sup>

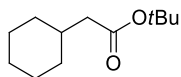

**2q** **tert-Butyl 2-cyclohexylacetate (2q)**, The title compound was synthesized according to general procedure A. Colorless liquid; Yield = 95%;  $^1\text{H}$  NMR (500 MHz,  $\text{CDCl}_3$ )  $\delta$  2.07 (d,  $J$  = 6.9 Hz, 2H), 1.79–1.60 (m, 6H), 1.43 (s, 9H), 1.32–1.07 (m, 3H), 1.02–0.87 (m, 2H);  $^{13}\text{C}$  NMR (126 MHz,  $\text{CDCl}_3$ )  $\delta$  172.8, 80.0, 43.6, 35.2, 33.1, 28.3, 26.4, 26.2 ppm; HRMS (FAB)  $m/z$   $[\text{M}+\text{H}]^+$  calcd. for  $\text{C}_{12}\text{H}_{23}\text{O}_2$  199.1698, found 199.1698

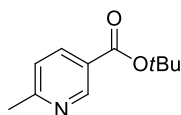

**2r** **tert-Butyl 6-methylnicotinate (2r)**, The title compound was synthesized according to general procedure A. Yellow liquid; Yield = 88%;  $^1\text{H}$  NMR (500 MHz,  $\text{CDCl}_3$ )  $\delta$  9.02 (d,  $J$  = 2.0 Hz, 1H), 8.08 (dd,  $J$  = 8.1, 2.2 Hz, 1H), 7.17 (d,  $J$  = 8.1 Hz, 1H), 2.58 (s, 3H), 1.57 (s, 9H);  $^{13}\text{C}$  NMR (126 MHz,  $\text{CDCl}_3$ )  $\delta$  164.7, 162.6, 150.5, 137.2, 125.1, 122.8, 81.8, 28.3, 24.8 ppm; HRMS (FAB)  $m/z$   $[\text{M}+\text{H}]^+$  calcd. for  $\text{C}_{11}\text{H}_{16}\text{NO}_2$  194.1181, found 194.1183

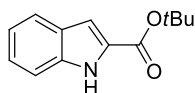

**2s** **tert-Butyl 1H-indole-2-carboxylate (2s)**, The title compound was synthesized according to general procedure A. White solid; Yield = 45%;  $^1\text{H}$  NMR (500 MHz,  $\text{CDCl}_3$ )  $\delta$  8.89 (s, 1H), 7.68 (dd,  $J$  = 8.0, 0.4 Hz, 1H), 7.42 (dd,  $J$  = 8.3, 0.6 Hz, 1H), 7.34–7.28 (m, 1H), 7.19–7.10 (m, 2H), 1.63 (s, 9H);  $^{13}\text{C}$  NMR (126 MHz,  $\text{CDCl}_3$ )  $\delta$  161.6, 136.8, 129.1, 127.7, 125.2, 122.6, 120.7, 112.0, 108.3, 81.9, 28.5 ppm. These data were consistent with those reported in the literature.<sup>11</sup>

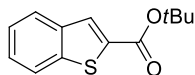

**2t** **tert-Butyl benzo[b]thiophene-2-carboxylate (2t)**, The title compound was synthesized according to general procedure A. Colorless liquid; Yield = 98%;  $^1\text{H}$  NMR (500 MHz,  $\text{CDCl}_3$ )  $\delta$  7.97 (s, 1H), 7.90–7.80 (m, 2H), 7.47–7.34 (m, 2H), 1.63 (s, 9H);  $^{13}\text{C}$  NMR (126 MHz,  $\text{CDCl}_3$ )  $\delta$  162.1, 142.2, 138.9, 135.9, 129.8, 126.7, 125.4, 124.8, 122.8, 82.4, 28.3 ppm. These data were consistent with those reported in the literature.<sup>12</sup>

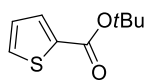

**2u** **tert-Butyl thiophene-2-carboxylate (2u)**, The title compound was synthesized according to general procedure A. Colorless liquid; Yield = 95%;  $^1\text{H}$  NMR (500 MHz,  $\text{CDCl}_3$ )  $\delta$  7.71 (dd,  $J$  = 3.7, 1.3 Hz, 1H), 7.48 (dd,  $J$  = 5.0, 1.3 Hz, 1H), 7.05 (dd,  $J$  = 5.0, 3.7 Hz, 1H), 1.57 (s, 9H);  $^{13}\text{C}$  NMR (126 MHz,  $\text{CDCl}_3$ )  $\delta$  161.6, 136.1, 132.8, 131.7, 127.6, 81.8, 28.3 ppm. These data were consistent with those reported in the literature.<sup>5</sup>

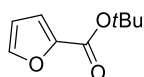

**2v** **tert-Butyl furan-2-carboxylate (2v)**, The title compound was synthesized according to general procedure A. Colorless liquid; Yield = 98%;  $^1\text{H}$  NMR (500 MHz,  $\text{CDCl}_3$ )  $\delta$  7.56–7.48 (m, 1H), 7.05 (d,  $J$  = 3.5 Hz, 1H), 6.45 (dd,  $J$  = 3.4, 1.7 Hz, 1H), 1.56 (s, 9H);  $^{13}\text{C}$  NMR (126 MHz,  $\text{CDCl}_3$ )  $\delta$  158.2, 146.0, 145.8, 117.0, 111.7, 82.0, 28.3 ppm. These data were consistent with those reported in the literature.<sup>4</sup>

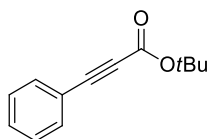

**2w** *tert*-Butyl 3-phenylpropiolate (**2w**). The title compound was synthesized according to general procedure A. Pale yellow liquid; Yield = 92%;  $^1\text{H}$  NMR (500 MHz,  $\text{CDCl}_3$ )  $\delta$  7.60–7.53 (m, 2H), 7.45–7.39 (m, 1H), 7.38–7.32 (m, 2H), 1.54 (s, 9H);  $^{13}\text{C}$  NMR (126 MHz,  $\text{CDCl}_3$ )  $\delta$  153.2, 133.0, 130.4, 128.6, 120.1, 83.8, 83.6, 82.2, 28.2 ppm. These data were consistent with those reported in the literature.<sup>4</sup>

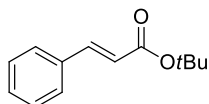

**2x** *tert*-Butyl *trans*-cinnamate (**2x**). The title compound was synthesized according to general procedure A. Colorless liquid; Yield = 95%;  $^1\text{H}$  NMR (500 MHz,  $\text{CDCl}_3$ )  $\delta$  7.60 (d,  $J$  = 16.0 Hz, 1H), 7.55–7.46 (m, 2H), 7.42–7.31 (m, 3H), 6.38 (d,  $J$  = 16.0 Hz, 1H), 1.54 (s, 9H);  $^{13}\text{C}$  NMR (126 MHz,  $\text{CDCl}_3$ )  $\delta$  166.4, 143.6, 134.8, 130.0, 128.9, 128.0, 120.3, 80.5, 28.3 ppm. These data were consistent with those reported in the literature.<sup>4</sup>

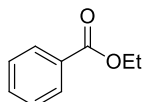

**2'a** Ethyl benzoate (**2'a**). The title compound was synthesized according to general procedure A. Colorless liquid; Yield = 68%;  $^1\text{H}$  NMR (500 MHz,  $\text{CDCl}_3$ )  $\delta$  8.05 (d,  $J$  = 7.2 Hz, 2H), 7.53 (t,  $J$  = 7.4 Hz, 1H), 7.42 (t,  $J$  = 7.6 Hz, 2H), 4.37 (q,  $J$  = 7.1 Hz, 2H), 1.39 (t,  $J$  = 7.1 Hz, 3H);  $^{13}\text{C}$  NMR (126 MHz,  $\text{CDCl}_3$ )  $\delta$  166.7, 132.8, 130.6, 129.6, 128.4, 61.0, 14.4 ppm. These data were consistent with those reported in the literature.<sup>13</sup>

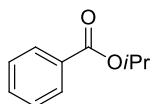

**2'b** Isopropyl benzoate (**2'b**). The title compound was synthesized according to general procedure A. Colorless liquid; Yield = 78%;  $^1\text{H}$  NMR (500 MHz,  $\text{CDCl}_3$ )  $\delta$  8.04 (d,  $J$  = 8.1 Hz, 2H), 7.54 (t,  $J$  = 7.4 Hz, 1H), 7.43 (t,  $J$  = 7.7 Hz, 2H), 5.33 – 5.18 (m, 1H), 1.37 (d,  $J$  = 6.4 Hz, 6H);  $^{13}\text{C}$  NMR (126 MHz,  $\text{CDCl}_3$ )  $\delta$  166.3, 132.8, 131.1, 129.6, 128.4, 68.5, 22.1 ppm. These data were consistent with those reported in the literature.<sup>14</sup>

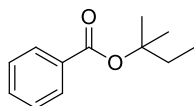

**2'c** *tert*-Pentyl benzoate (**2'c**). The title compound was synthesized according to general procedure A. Colorless liquid; Yield = 99%;  $^1\text{H}$  NMR (500 MHz,  $\text{CDCl}_3$ )  $\delta$  8.00 (d,  $J$  = 7.4 Hz, 2H), 7.52 (t,  $J$  = 7.4 Hz, 1H), 7.41 (t,  $J$  = 7.7 Hz, 2H), 1.93 (q,  $J$  = 7.5 Hz, 2H), 1.57 (s, 6H), 0.98 (t,  $J$  = 7.5 Hz, 3H);  $^{13}\text{C}$  NMR (126 MHz,  $\text{CDCl}_3$ )  $\delta$  165.8, 132.5, 132.2, 129.5, 128.3, 83.5, 33.9, 25.8, 8.4 ppm. These data were consistent with those reported in the literature.<sup>15</sup>

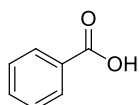

**3a-3d** Benzoic acid (**3a-3d**). The title compound was synthesized according to general procedure B. White solid; Yield = 60-99%;  $^1\text{H}$  NMR (500 MHz,  $\text{CDCl}_3$ )  $\delta$  12.76 (s, 1H), 8.20–8.08 (m, 2H), 7.68–7.59 (m, 1H), 7.49 (dd,  $J$  = 10.8, 4.9 Hz, 2H);  $^{13}\text{C}$  NMR (126 MHz,  $\text{CDCl}_3$ )  $\delta$  172.7, 134.0, 130.4, 129.5,

128.6 ppm. These data were consistent with those reported in the literature.<sup>16</sup>

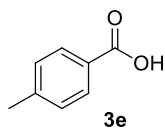

**4-Methylbenzoic acid (3e)**, The title compound was synthesized according to general procedure B. White solid; Yield = 80%; <sup>1</sup>H NMR (500 MHz, CDCl<sub>3</sub>) δ 8.01 (d, *J* = 8.2 Hz, 2H), 7.28 (d, *J* = 8.0 Hz, 2H), 2.44 (s, 3H); <sup>13</sup>C NMR (126 MHz, CDCl<sub>3</sub>) δ 172.4, 144.8, 130.4, 129.4, 126.7, 21.9 ppm. These data were consistent with those reported in the literature.<sup>17</sup>

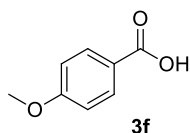

**4-Methoxybenzoic acid (3f)**, The title compound was synthesized according to general procedure B. White solid; Yield = 62%; <sup>1</sup>H NMR (500 MHz, DMSO-*d*<sub>6</sub>) δ 12.61 (s, 1H), 7.89 (d, *J* = 8.8 Hz, 2H), 7.01 (d, *J* = 8.7 Hz, 2H), 3.82 (s, 3H); <sup>13</sup>C NMR (126 MHz, DMSO-*d*<sub>6</sub>) δ 167.0, 162.8, 131.3, 123.0, 113.8, 55.4 ppm. These data were consistent with those reported in the literature.<sup>17</sup>

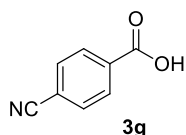

**4-Cyanobenzoic acid (3g)**, The title compound was synthesized according to general procedure B. White solid; Yield = 80%; <sup>1</sup>H NMR (500 MHz, CDCl<sub>3</sub>) δ 13.54 (s, 1H), 8.06 (d, *J* = 8.3 Hz, 2H), 7.94 (d, *J* = 8.3 Hz, 2H); <sup>13</sup>C NMR (126 MHz, CDCl<sub>3</sub>) δ 166.1, 134.9, 132.7, 130.0, 118.2, 115.1 ppm. These data were consistent with those reported in the literature.<sup>18</sup>

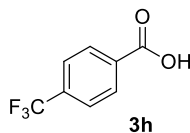

**4-(Trifluoromethyl)benzoic acid (3h)**, The title compound was synthesized according to general procedure B. White solid; Yield = 88%; <sup>1</sup>H NMR (500 MHz, Acetone-*d*<sub>6</sub>) δ 11.71 (s, 1H), 8.24 (d, *J* = 8.0 Hz, 2H), 7.88 (d, *J* = 8.3 Hz, 2H); <sup>13</sup>C NMR (126 MHz, Acetone-*d*<sub>6</sub>) δ 166.5, 135.2, 134.5 (q, *J*<sub>C-F</sub> = 32.3 Hz), 131.2, 126.4 (q, *J*<sub>C-F</sub> = 3.8 Hz), 124.9 (d, *J*<sub>C-F</sub> = 271.9 Hz); <sup>19</sup>F NMR (471 MHz, Acetone-*d*<sub>6</sub>) δ -63.6 ppm. These data were consistent with those reported in the literature.<sup>19</sup>

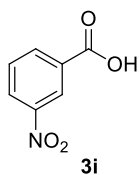

**3-Nitrobenzoic acid (3i)**, The title compound was synthesized according to general procedure B. White solid; Yield = 86%; <sup>1</sup>H NMR (500 MHz, CDCl<sub>3</sub>) δ 9.02–8.92 (m, 1H), 8.56–8.42 (m, 2H), 7.73 (t, *J* = 8.0 Hz, 1H); <sup>13</sup>C NMR (126 MHz, CDCl<sub>3</sub>) δ 170.0, 148.5, 136.0, 131.0, 130.1, 128.5, 125.4 ppm. These data were consistent with those reported in the literature.<sup>20</sup>

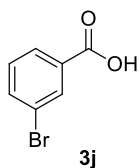

**3-Bromobenzoic acid (3j)**, The title compound was synthesized according to general procedure B. White solid; Yield = 72%; <sup>1</sup>H NMR (500 MHz, Acetone-*d*<sub>6</sub>) δ 11.52 (s, 1H), 8.15 (t, *J* = 1.8 Hz, 1H), 8.09 – 7.97 (m, 1H), 7.81 (ddd, *J* = 8.0, 2.0, 1.0 Hz, 1H), 7.49 (t, *J* = 7.9 Hz, 1H); <sup>13</sup>C

NMR (126 MHz, Acetone- $d_6$ )  $\delta$  166.2, 136.6, 133.7, 133.1, 131.5, 129.3, 122.8 ppm. These data were consistent with those reported in the literature.<sup>21</sup>

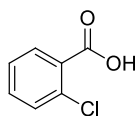

**3k 2-Chlorobenzoic acid (3k)**, The title compound was synthesized according to general procedure B. White solid; Yield = 63%;  $^1\text{H}$  NMR (500 MHz, Acetone- $d_6$ )  $\delta$  11.60 (s, 1H), 7.96 – 7.84 (m, 1H), 7.59 – 7.50 (m, 2H), 7.48 – 7.38 (m, 1H);  $^{13}\text{C}$  NMR (126 MHz, Acetone- $d_6$ )  $\delta$  166.8, 133.7, 133.6, 132.2, 131.7, 131.7, 127.8 ppm. These data were consistent with those reported in the literature.<sup>22</sup>

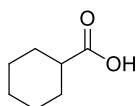

**3n Cyclohexanecarboxylic acid (3n)**, The title compound was synthesized according to general procedure B. White solid; Yield = 82%;  $^1\text{H}$  NMR (500 MHz,  $\text{CDCl}_3$ )  $\delta$  12.01 (s, 1H), 2.30 (tt,  $J$  = 11.2, 3.6 Hz, 1H), 1.91 (dd,  $J$  = 13.2, 2.7 Hz, 2H), 1.80–1.69 (m, 2H), 1.67–1.57 (m, 1H), 1.51–1.37 (m, 2H), 1.34–1.12 (m, 3H);  $^{13}\text{C}$  NMR (126 MHz,  $\text{CDCl}_3$ )  $\delta$  183.2, 43.1, 28.8, 25.8, 25.4 ppm. These data were consistent with those reported in the literature.<sup>23</sup>

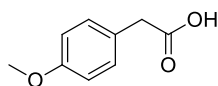

**3o 2-(4-Methoxyphenyl)acetic acid (3o)**, The title compound was synthesized according to general procedure B. Brown solid; Yield = 89%;  $^1\text{H}$  NMR (500 MHz,  $\text{CDCl}_3$ )  $\delta$  7.24–7.15 (m, 2H), 6.91–6.84 (m, 2H), 3.80 (s, 3H), 3.59 (s, 2H);  $^{13}\text{C}$  NMR (126 MHz,  $\text{CDCl}_3$ )  $\delta$  178.3, 159.0, 130.6, 125.5, 114.2, 55.4, 40.3 ppm. These data were consistent with those reported in the literature.<sup>24</sup>

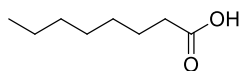

**3p Octanoic acid (3p)**, The title compound was synthesized according to general procedure B. Colorless liquid; Yield = 87%;  $^1\text{H}$  NMR (500 MHz,  $\text{CDCl}_3$ )  $\delta$  2.35 (t,  $J$  = 7.5 Hz, 2H), 1.63 (dt,  $J$  = 14.9, 7.5 Hz, 2H), 1.39–1.22 (m, 8H), 0.88 (t,  $J$  = 6.9 Hz, 3H);  $^{13}\text{C}$  NMR (126 MHz,  $\text{CDCl}_3$ )  $\delta$  180.0, 34.1, 31.8, 29.2, 29.0, 24.8, 22.7, 14.2 ppm. These data were consistent with those reported in the literature.<sup>25</sup>

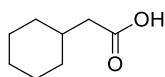

**3q 2-Cyclohexylacetic acid (3q)**, The title compound was synthesized according to general procedure B. Yellow liquid; Yield = 90%;  $^1\text{H}$  NMR (500 MHz,  $\text{CDCl}_3$ )  $\delta$  11.88 (s, 1H), 2.22 (d,  $J$  = 6.8 Hz, 2H), 1.84–1.61 (m, 6H), 1.34–1.22 (m, 2H), 1.14 (ddt,  $J$  = 12.7, 7.0, 3.1 Hz, 1H), 1.06–0.90 (m, 2H);  $^{13}\text{C}$  NMR (126 MHz,  $\text{CDCl}_3$ )  $\delta$  180.0, 42.1, 34.8, 33.1, 26.2, 26.1 ppm. These data were consistent with those reported in the literature.<sup>26</sup>

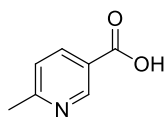

**3r 6-Methylnicotinic acid (3r)**, The title compound was synthesized according to general procedure B. Yellow solid; Yield = 99%;  $^1\text{H}$  NMR (500 MHz,  $\text{DMSO}-d_6$ )  $\delta$  8.97 (d,  $J$  = 1.5 Hz, 1H), 8.61 (d,  $J$  = 8.2 Hz, 1H), 7.84 (d,  $J$  = 8.2 Hz, 1H), 2.75 (s, 3H);  $^{13}\text{C}$  NMR (126 MHz,  $\text{DMSO}-d_6$ )  $\delta$  164.1, 158.5, 143.5, 143.3, 127.0, 126.8, 20.5 ppm. These data were consistent with those reported in the

literature.<sup>27</sup>

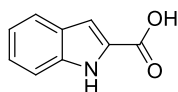

**3s**

**1H-Indole-2-carboxylic acid (3s)**, The title compound was synthesized according to general procedure B. Brown solid; Yield = 50%; <sup>1</sup>H NMR (500 MHz, DMSO-*d*<sub>6</sub>)  $\delta$  12.92 (s, 1H), 11.74 (s, 1H), 7.64 (d, *J* = 8.0 Hz, 1H), 7.44 (d, *J* = 8.3 Hz, 1H), 7.29–7.18 (m, 1H), 7.14–7.01 (m, 2H); <sup>13</sup>C NMR (126 MHz, DMSO-*d*<sub>6</sub>)  $\delta$  162.8, 137.2, 128.4, 126.9, 124.3, 121.9, 120.0, 112.5, 107.3 ppm. These data were consistent with those reported in the literature.<sup>28</sup>

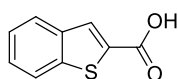

**3t**

**Benzo[*b*]thiophene-2-carboxylic acid (3t)**, The title compound was synthesized according to general procedure B. Pale yellow solid; Yield = 71%; <sup>1</sup>H NMR (500 MHz, DMSO-*d*<sub>6</sub>)  $\delta$  13.48 (s, 1H), 8.11 (s, 1H), 8.07–7.93 (m, 2H), 7.59–7.36 (m, 2H); <sup>13</sup>C NMR (126 MHz, DMSO-*d*<sub>6</sub>)  $\delta$  163.6, 141.4, 138.8, 134.8, 130.3, 127.0, 125.7, 125.1, 123.0 ppm. These data were consistent with those reported in the literature.<sup>29</sup>

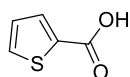

**3u**

**Thiophene-2-carboxylic acid (3u)**, The title compound was synthesized according to general procedure B. White solid; Yield = 56%; <sup>1</sup>H NMR (500 MHz, CDCl<sub>3</sub>)  $\delta$  11.78 (s, 1H), 7.91 (dd, *J* = 3.8, 1.2 Hz, 1H), 7.66 (dd, *J* = 5.0, 1.2 Hz, 1H), 7.15 (dd, *J* = 4.9, 3.8 Hz, 1H); <sup>13</sup>C NMR (126 MHz, CDCl<sub>3</sub>)  $\delta$  167.7, 135.2, 134.2, 133.0, 128.2 ppm. These data were consistent with those reported in the literature.<sup>17</sup>

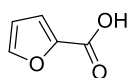

**3v**

**Furan-2-carboxylic acid (3v)**, The title compound was synthesized according to general procedure B. Beige solid; Yield = 62%; <sup>1</sup>H NMR (500 MHz, CDCl<sub>3</sub>)  $\delta$  11.60 (s, 1H), 7.65 (d, *J* = 0.6 Hz, 1H), 7.35 (d, *J* = 3.5 Hz, 1H), 6.57 (dd, *J* = 3.5, 1.6 Hz, 1H); <sup>13</sup>C NMR (126 MHz, CDCl<sub>3</sub>)  $\delta$  163.7, 147.6, 143.9, 120.4, 112.5 ppm. These data were consistent with those reported in the literature.<sup>29</sup>

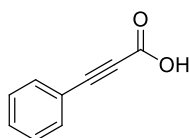

**3w**

**3-Phenylpropionic acid (3w)**, The title compound was synthesized according to general procedure B. Beige solid; Yield = 24%; <sup>1</sup>H NMR (500 MHz, CDCl<sub>3</sub>)  $\delta$  13.81 (s, 1H), 7.63 (d, *J* = 7.9 Hz, 2H), 7.55 (dd, *J* = 11.0, 3.9 Hz, 1H), 7.48 (t, *J* = 7.7 Hz, 2H); <sup>13</sup>C NMR (126 MHz, CDCl<sub>3</sub>)  $\delta$  154.3, 132.6, 130.9, 129.0, 119.0, 84.4, 81.7 ppm. These data were consistent with those reported in the literature.<sup>30</sup>

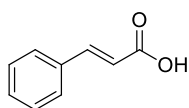

**3x**

***trans*-Cinnamic acid (3x)**, The title compound was synthesized according to general procedure B. White solid; Yield = 54%; <sup>1</sup>H NMR (500 MHz, CDCl<sub>3</sub>)  $\delta$  12.22 (s, 1H), 7.81 (d, *J* = 16.0 Hz, 1H), 7.57 (dd, *J* = 6.8, 2.8 Hz, 2H), 7.48–7.36 (m, 3H), 6.47 (d, *J* = 16.0 Hz, 1H); <sup>13</sup>C NMR (126 MHz, CDCl<sub>3</sub>)  $\delta$  172.7, 147.3, 134.2, 130.9, 129.1, 128.5, 117.5 ppm. These data were consistent with

those reported in the literature.<sup>31</sup>

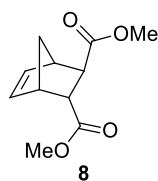

**(1R,2R,3R,4S)-Dimethyl bicyclo[2.2.1]hept-5-ene-2,3-dicarboxylate (8)**, The title compound was synthesized according to reference. Colorless liquid; Yield = 99%; <sup>1</sup>H NMR (500 MHz, CDCl<sub>3</sub>)  $\delta$  6.27 (dd,  $J$  = 5.5, 3.2 Hz, 1H), 6.07 (dd,  $J$  = 5.6, 2.8 Hz, 1H), 3.71 (s, 3H), 3.64 (s, 3H), 3.37 (t,  $J$  = 4.1 Hz, 1H), 3.26 (s, 1H), 3.12 (s, 1H), 2.68 (dd,  $J$  = 4.5, 1.5 Hz, 1H), 1.61 (d,  $J$  = 8.9 Hz, 1H), 1.46 (dd,  $J$  = 8.8, 1.6 Hz, 1H); <sup>13</sup>C NMR (126 MHz, CDCl<sub>3</sub>)  $\delta$  175.0, 173.9, 137.7, 135.3, 52.2, 52.0, 48.0, 47.8, 47.5, 47.2, 45.8 ppm. These data were consistent with those reported in the literature.<sup>32</sup>

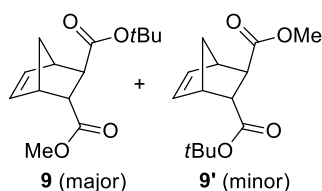

**(1S,2R,3R,4R)-2-tert-Butyl 3-methyl bicyclo[2.2.1]hept-5-ene-2,3-dicarboxylate (9)**, The title compound was synthesized according to general procedure A. Colorless liquid; Yield = 60%; No attempt was made to separate the isomer mixture; <sup>1</sup>H NMR (500 MHz, CDCl<sub>3</sub>)  $\delta$  6.26 (dd,  $J$  = 5.5, 3.1 Hz, 1H both isomers), 6.07–6.01 (m, 1H both isomers), 3.21 (s, 1H both isomers), 1.57 (d,  $J$  = 8.8 Hz, 1H both isomers); **Major**  $\delta$  3.62 (s, 3H), 3.33 (t,  $J$  = 4.1 Hz, 1H), 3.06 (m, 1H), 2.57 (dd,  $J$  = 4.4, 1.6 Hz, 1H), 1.44 (s, 9H), 1.42 (d,  $J$  = 1.7 Hz, 1H); **Minor**  $\delta$  3.69 (s, 3H), 3.27 (t,  $J$  = 4.1 Hz, 1H), 3.08 (m, 1H), 2.63 (dd,  $J$  = 4.4, 1.6 Hz, 1H), 1.41–1.40 (m, 1H), 1.40 (s, 9H); <sup>13</sup>C NMR (126 MHz, CDCl<sub>3</sub>) **Major**  $\delta$  174.1, 173.7, 137.8, 135.2, 80.7, 51.8, 48.4, 47.9, 47.7, 47.3, 45.8, 28.2; **Minor**  $\delta$  175.3, 172.5, 137.6, 135.0, 80.5, 52.1, 49.0, 47.8, 47.5, 46.8, 46.0, 28.2 ppm. These data were consistent with those reported in the literature.<sup>33</sup>

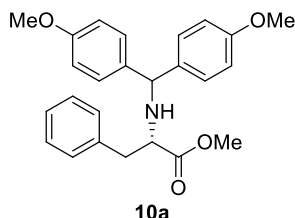

**(S)-Methyl 2-((bis(4-methoxyphenyl)methyl)amino)-3-phenylpropanoate (10a)**, The title compound was synthesized according to general procedure C. White solid;  $[\alpha]_D^{20}$  = -15.2 ( $c$  0.1, MeOH); Yield = 89%; m.p. = 71–72 °C; <sup>1</sup>H NMR (500 MHz, CDCl<sub>3</sub>)  $\delta$  7.30–7.17 (m, 5H), 7.17–7.12 (m, 2H), 7.07 (d,  $J$  = 8.6 Hz, 2H), 6.78 (d,  $J$  = 8.7 Hz, 2H), 6.72 (d,  $J$  = 8.7 Hz, 2H), 4.68 (s, 1H), 3.72 (d,  $J$  = 5.0 Hz, 6H), 3.64 (s, 3H), 3.43 (dd,  $J$  = 7.7, 5.9 Hz, 1H), 2.96 (dd,  $J$  = 13.4, 5.9 Hz, 1H), 2.88 (dd,  $J$  = 13.4, 7.8 Hz, 1H), 2.06 (s, 1H); <sup>13</sup>C NMR (126 MHz, CDCl<sub>3</sub>)  $\delta$  175.5, 158.7, 158.6, 137.7, 137.0, 135.1, 129.6, 128.5, 128.3, 128.3, 126.6, 113.9, 113.8, 64.2, 60.7, 55.3, 55.3, 51.7, 40.2 ppm; HRMS (EI)  $m/z$  [M]<sup>+</sup> calcd. for C<sub>25</sub>H<sub>27</sub>NO<sub>4</sub> 405.1940, found 405.1962

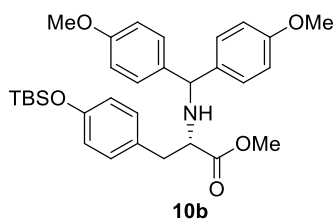

**(S)-Methyl 2-((bis(4-methoxyphenyl)methyl)amino)-3-(4-((tert-butyldimethylsilyl)oxy)phenyl)propanoate (10b)**, The title compound was synthesized according to general procedure C. Colorless oil;  $[\alpha]_D^{20}$  = -0.2 ( $c$  0.1, MeOH); Yield = 83%; <sup>1</sup>H NMR (500 MHz,

CDCl<sub>3</sub>)  $\delta$  7.22 (d,  $J$  = 8.6 Hz, 2H), 7.11 (d,  $J$  = 8.6 Hz, 2H), 7.03 (d,  $J$  = 8.4 Hz, 2H), 6.81–6.76 (m, 6H), 4.69 (s, 1H), 3.76 (d,  $J$  = 4.7 Hz, 6H), 3.65 (s, 3H), 3.41 (dd,  $J$  = 7.6, 6.2 Hz, 1H), 2.87 (ddd,  $J$  = 21.3, 13.5, 6.9 Hz, 2H), 2.06 (s, 1H), 1.01 (s, 9H), 0.22 (s, 6H); <sup>13</sup>C NMR (126 MHz, CDCl<sub>3</sub>)  $\delta$  175.6, 158.7, 158.7, 154.5, 137.0, 135.1, 130.5, 130.5, 128.5, 128.4, 120.0, 113.9, 113.9, 64.2, 60.8, 55.3, 55.3, 51.7, 39.5, 25.8, 18.4, -4.3 ppm; HRMS (EI)  $m/z$  [M]<sup>+</sup> calcd. for C<sub>31</sub>H<sub>41</sub>NO<sub>5</sub>Si 535.2754, found 535.2775

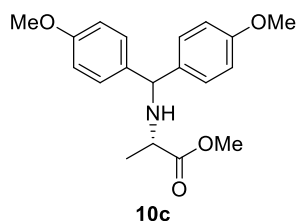

**(S)-Methyl 2-((bis(4-methoxyphenyl)methyl)amino)propanoate (10c),**

The title compound was synthesized according to general procedure C. Colorless oil;  $[\alpha]_D^{20}$  = -32.8 (*c* 0.1, MeOH); Yield = 97%; <sup>1</sup>H NMR (500 MHz, CDCl<sub>3</sub>)  $\delta$  7.35–7.33 (m, 2H) 7.28–7.26 (m, 2H), 6.87–6.82 (m, 4H), 4.76 (s, 1H), 3.77 (d,  $J$  = 10.7 Hz, 6H), 3.72 (s, 3H), 3.31 (q,  $J$  = 7.1 Hz, 1H), 2.10 (s, 1H), 1.32 (d,  $J$  = 7.1 Hz, 3H); <sup>13</sup>C NMR (126 MHz, CDCl<sub>3</sub>)  $\delta$  176.7, 158.7, 158.7, 136.9, 135.3, 128.5, 128.4, 113.9, 113.9, 64.1, 55.3, 55.3, 54.4, 51.8, 19.6 ppm; HRMS (EI)  $m/z$  [M]<sup>+</sup> calcd. for C<sub>19</sub>H<sub>23</sub>NO<sub>4</sub> 329.1627, found 329.1630

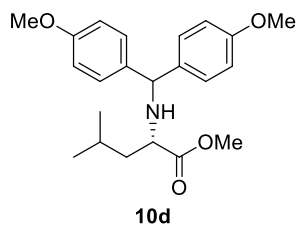

**(S)-Methyl 2-((bis(4-methoxyphenyl)methyl)amino)-4-methylpentanoate (10d),**

The title compound was synthesized according to general procedure C. Colorless oil;  $[\alpha]_D^{20}$  = -46.6 (*c* 0.1, MeOH); Yield = 90%; <sup>1</sup>H NMR (500 MHz, CDCl<sub>3</sub>)  $\delta$  7.37 (d,  $J$  = 8.7 Hz, 2H), 7.31 (d,  $J$  = 8.7 Hz, 2H), 6.86 (dd,  $J$  = 18.9, 8.7 Hz, 4H), 4.73 (s, 1H), 3.78–3.73 (m, 9H), 3.26 (dd,  $J$  = 8.9, 5.5 Hz, 1H), 2.00–1.93 (m, 2H), 1.57–1.43 (m, 2H), 0.94 (d,  $J$  = 6.7 Hz, 3H), 0.85 (d,  $J$  = 6.6 Hz, 3H); <sup>13</sup>C NMR (126 MHz, CDCl<sub>3</sub>)  $\delta$  176.8, 158.7, 158.6, 137.2, 135.2, 128.6, 128.2, 113.8, 64.3, 57.6, 55.2, 55.2, 51.6, 43.4, 24.8, 23.2, 22.02 ppm; HRMS (EI)  $m/z$  [M]<sup>+</sup> calcd. for C<sub>22</sub>H<sub>29</sub>NO<sub>4</sub> 371.2097, found 371.2092

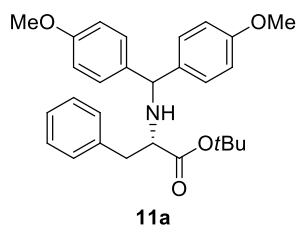

**(S)-tert-Butyl 2-((bis(4-methoxyphenyl)methyl)amino)-3-phenylpropanoate (11a),**

The title compound was synthesized according to general procedure D. Colorless oil;  $[\alpha]_D^{20}$  = -12.9 (*c* 0.1, MeOH); Yield = 86%; <sup>1</sup>H NMR (500 MHz, CDCl<sub>3</sub>)  $\delta$  7.27–7.16 (m, 7H), 7.12–7.09 (m, 2H), 6.79–6.73 (m, 4H), 4.70 (s, 1H), 3.73 (d,  $J$  = 10.0 Hz, 6H), 3.29 (t,  $J$  = 7.0 Hz, 1H), 2.92–2.84 (m, 2H), 2.05 (s, 1H), 1.38 (s, 9H); <sup>13</sup>C NMR (126 MHz, CDCl<sub>3</sub>)  $\delta$  174.3, 158.6, 158.6, 138.0, 137.2, 135.2, 129.7, 128.5, 128.4, 128.2, 126.5, 113.9, 113.8, 81.1, 64.2, 61.2, 55.3, 55.3, 40.3, 28.2 ppm; HRMS (EI)  $m/z$  [M]<sup>+</sup> calcd. for C<sub>28</sub>H<sub>33</sub>NO<sub>4</sub> 447.2410, found 447.2407; HPLC analysis: Chiralpak OD-H (hexane/isopropyl = 99:1, wavelength = 210 nm, flow rate = 0.7 mL/min), *t*<sub>R</sub> = 10.6 min (major), 12.5 min (minor)

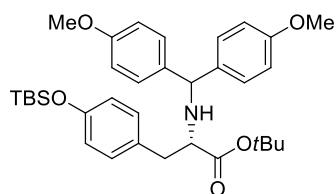

**11b**

**(S)-tert-Butyl 2-((bis(4-methoxyphenyl)methyl)amino)-3-(4-((tert-butyldimethylsilyl)oxy)phenyl) propanoate (11b)**, The title compound was synthesized according to general procedure D. Colorless oil;  $[\alpha]_D^{20} = -2.4$  (*c* 0.1, MeOH); Yield = 56%;  $^1\text{H}$  NMR (500 MHz,  $\text{CDCl}_3$ )  $\delta$  7.24 (d, *J* = 8.6 Hz, 2H), 7.17 (d, *J* = 8.6 Hz, 2H), 7.07 (d, *J* = 8.4 Hz, 2H), 6.80 (dd, *J* = 18.2, 8.8 Hz, 6H), 4.74 (s, 1H), 3.78 (d, *J* = 10.5 Hz, 6H), 3.29 (t, *J* = 7.0 Hz, 1H), 2.90–2.82 (m, 2H), 2.06 (s, 1H), 1.42 (s, 9H), 1.02 (s, 9H), 0.23 (s, 6H);  $^{13}\text{C}$  NMR (126 MHz,  $\text{CDCl}_3$ )  $\delta$  174.4, 158.6, 158.6, 154.3, 137.3, 135.3, 130.8, 130.7, 128.6, 128.4, 119.8, 113.9, 113.8, 81.0, 64.2, 61.3, 55.3, 55.3, 39.5, 28.2, 25.9, 18.4, -4.3 ppm; HRMS (EI) *m/z* [*M*]<sup>+</sup> calcd. for  $\text{C}_{34}\text{H}_{47}\text{NO}_5\text{Si}$  577.3224, found 577.3224; HPLC analysis: Chiralpak AD-H (hexane/isopropyl = 99:1, wavelength = 254 nm, flow rate = 0.4 mL/min), *t<sub>R</sub>* = 10.9 min (major), 12.7 min (minor)

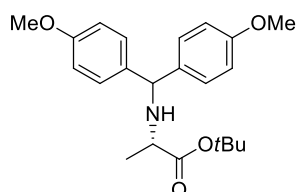

**11c**

**(S)-tert-Butyl 2-((bis(4-methoxyphenyl)methyl)amino)propanoate (11c)**, The title compound was synthesized according to general procedure D. Colorless oil;  $[\alpha]_D^{20} = -21.9$  (*c* 0.1, MeOH); Yield = 82%;  $^1\text{H}$  NMR (500 MHz,  $\text{CDCl}_3$ )  $\delta$  7.32 (d, *J* = 8.6 Hz, 2H), 7.24 (d, *J* = 8.7 Hz, 2H), 6.84 (d, *J* = 8.7 Hz, 2H), 6.80 (d, *J* = 8.7 Hz, 2H), 4.75 (s, 1H), 3.76 (d, *J* = 14.0 Hz, 6H), 3.14 (q, *J* = 7.0 Hz, 1H), 2.04 (s, 1H), 1.47 (s, 9H), 1.25 (d, *J* = 7.0 Hz, 3H);  $^{13}\text{C}$  NMR (126 MHz,  $\text{CDCl}_3$ )  $\delta$  175.6, 158.7, 158.7, 137.2, 135.4, 128.6, 128.4, 113.9, 113.9, 80.9, 64.1, 55.3, 55.2, 28.3, 19.7 ppm; HRMS (EI) *m/z* [*M*]<sup>+</sup> calcd. for  $\text{C}_{22}\text{H}_{29}\text{NO}_4$  371.2097, found 371.2071; HPLC analysis: Chiralpak AD-H (hexane/isopropyl = 99:1, wavelength = 210 nm, flow rate = 0.7 mL/min), *t<sub>R</sub>* = 11.7 min (major), 16.3 min (minor)

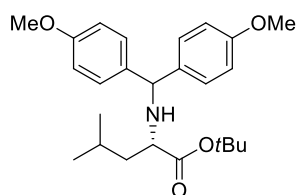

**11d**

**(S)-tert-Butyl 2-((bis(4-methoxyphenyl)methyl)amino)-4-methylpentanoate (11d)**, The title compound was synthesized according to general procedure D. Colorless oil;  $[\alpha]_D^{20} = -39.1$  (*c* 0.1, MeOH); Yield = 71%;  $^1\text{H}$  NMR (500 MHz,  $\text{CDCl}_3$ )  $\delta$  7.33 (d, *J* = 8.6 Hz, 2H), 7.25 (d, *J* = 8.7 Hz, 2H), 6.82 (dd, *J* = 23.9, 8.7 Hz, 4H), 4.71 (s, 1H), 3.74 (d, *J* = 17.0 Hz, 6H), 3.05 (dd, *J* = 8.5, 5.9 Hz, 1H), 1.95–1.87 (m, 2H), 1.47 (s, 9H), 1.45–1.34 (m, 2H), 0.89 (d, *J* = 6.7 Hz, 3H), 0.81 (d, *J* = 6.6 Hz, 3H);  $^{13}\text{C}$  NMR (126 MHz,  $\text{CDCl}_3$ )  $\delta$  175.8, 158.7, 158.6, 137.5, 135.4, 128.7, 128.3, 113.9, 113.8, 80.7, 64.2, 58.3, 55.3, 55.3, 43.4, 28.3, 24.9, 23.2, 22.3 ppm; HRMS (EI) *m/z* [*M*]<sup>+</sup> calcd. for  $\text{C}_{25}\text{H}_{35}\text{NO}_4$  413.2566, found 413.2570; HPLC analysis: Chiralpak IA (hexane/isopropyl = 97:3, wavelength = 260 nm, flow rate = 0.6 mL/min), *t<sub>R</sub>* = 8.4 min (major), 13.5 min (minor)

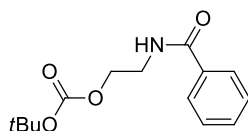

**13a**

**2-Benzamidoethyl *tert*-butyl carbonate (13a)**, The title compound was synthesized according to general procedure A. White solid; Yield = 78%; m.p. = 92-93 °C;  $^1\text{H}$  NMR (500 MHz,  $\text{CDCl}_3$ )  $\delta$  7.76 (d,  $J$  = 7.5 Hz, 2H), 7.48 (t,  $J$  = 7.4 Hz, 1H), 7.40 (t,  $J$  = 7.6 Hz, 2H), 6.71 (s, 1H), 4.26–4.24 (m, 2H), 3.72 (dd,  $J$  = 10.4, 5.4 Hz, 2H), 1.47 (s, 9H);  $^{13}\text{C}$  NMR (126 MHz,  $\text{CDCl}_3$ )  $\delta$  167.7, 153.7, 134.3, 131.7, 128.6, 127.1, 82.8, 65.9, 39.5, 27.8 ppm; HRMS (EI)  $m/z$   $[\text{M}]^+$  calcd. for  $\text{C}_{14}\text{H}_{19}\text{NO}_4$  265.1314, found 265.1327

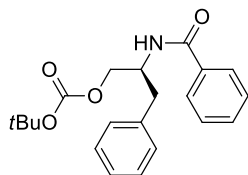

**13b**

**(*S*)-2-Benzamido-3-phenylpropyl *tert*-butyl carbonate (13b)**, The title compound was synthesized according to general procedure A. White solid;  $[\alpha]_{\text{D}}^{20}$  = -46.9 ( $c$  0.1, MeOH); Yield = 88%; m.p. = 95-96 °C;  $^1\text{H}$  NMR (500 MHz,  $\text{CDCl}_3$ )  $\delta$  7.72 (d,  $J$  = 7.4 Hz, 2H), 7.49 (t,  $J$  = 7.4 Hz, 1H), 7.42 (t,  $J$  = 7.6 Hz, 2H), 7.35–7.28 (m, 2H), 7.28–7.20 (m, 3H), 6.46 (d,  $J$  = 8.0 Hz, 1H), 4.70–4.52 (m, 1H), 4.17 (ddd,  $J$  = 15.2, 11.3, 4.4 Hz, 2H), 3.07 (dd,  $J$  = 13.7, 6.2 Hz, 1H), 2.95 (dd,  $J$  = 13.7, 8.0 Hz, 1H), 1.48 (s, 9H);  $^{13}\text{C}$  NMR (126 MHz,  $\text{CDCl}_3$ )  $\delta$  167.1, 153.9, 137.2, 134.5, 131.7, 129.5, 128.8, 128.7, 127.1, 127.0, 82.9, 67.1, 50.6, 37.4, 27.9 ppm; HRMS (FAB)  $m/z$   $[\text{M}+\text{H}]^+$  calcd. for  $\text{C}_{21}\text{H}_{26}\text{NO}_4$  356.1862, found 356.1868

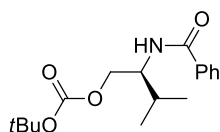

**13c**

**(*S*)-2-Benzamido-3-methylbutyl *tert*-butyl carbonate (13c)**, The title compound was synthesized according to general procedure A. White solid;  $[\alpha]_{\text{D}}^{20}$  = -5.6 ( $c$  0.1, MeOH); Yield = 72%; m.p. = 92-93 °C;  $^1\text{H}$  NMR (500 MHz,  $\text{CDCl}_3$ )  $\delta$  7.78 (d,  $J$  = 7.3 Hz, 2H), 7.50 (t,  $J$  = 7.3 Hz, 1H), 7.44 (t,  $J$  = 7.5 Hz, 2H), 6.32 (d,  $J$  = 8.9 Hz, 1H), 4.37 (dd,  $J$  = 11.3, 5.4 Hz, 1H), 4.23–4.10 (m, 2H), 2.04–1.95 (m, 1H), 1.45 (s, 9H), 1.02 (t,  $J$  = 6.5 Hz, 6H);  $^{13}\text{C}$  NMR (126 MHz,  $\text{CDCl}_3$ )  $\delta$  167.3, 154.0, 134.7, 131.6, 128.6, 127.1, 82.6, 66.9, 54.3, 29.6, 27.8, 19.5, 19.0 ppm; HRMS (EI)  $m/z$   $[\text{M}]^+$  calcd. for  $\text{C}_{17}\text{H}_{25}\text{NO}_4$  307.1784, found 307.1770

## References

- 1 C.-P. Yu, Y. Tang, L. Cha, S. Milikisiyants, T. I. Smirnova, A. I. Smirnov, Y. Guo and W.-c. Chang, *J. Am. Chem. Soc.*, 2018, **140**, 15190-15193.
- 2 K. Tóth, G. Höfner and K. T. Wanner, *Bioorg. Med. Chem.*, 2018, **26**, 3668-3687.
- 3 R. W. Hanson and H. D. Law, *J. Chem. Soc.*, 1965, 7285-7296.
- 4 M. T. La and H.-K. Kim, *Tetrahedron*, 2018, **74**, 3748-3754.
- 5 K. Ghosh, R. A. Molla, M. A. Iqbal and S. M. Islam, *Green Chem.*, 2015, **17**, 3540-3551.
- 6 Z. Xin, T. M. Gøgsig, A. T. Lindhardt and T. Skrydstrup, *Org. Lett.*, 2012, **14**, 284-287.
- 7 W. C. Drewe, R. Nanjunda, M. Gunaratnam, M. Beltran, G. N. Parkinson, A. P. Reszka, W. D. Wilson and S. Neidle, *J. Med. Chem.*, 2008, **51**, 7751-7767.
- 8 Y. Nishimoto, S. A. Babu, M. Yasuda and A. Baba, *J. Org. Chem.*, 2008, **73**, 9465-9468.
- 9 I. Abdiaj, L. Huck, J. M. Mateo, A. de la Hoz, M. V. Gomez, A. Díaz-Ortiz and J. Alcázar, *Angew. Chem., Int. Ed.*, 2018, **57**, 13231-13236.
- 10 Y. Iuchi, Y. Obora and Y. Ishii, *J. Am. Chem. Soc.*, 2010, **132**, 2536-2537.
- 11 D. H. Kim, C. J. Guinasso, G. C. Buzby, Jr., D. R. Herbst, R. J. McCaully, T. C. Wicks and R. L. Wendt, *J. Med. Chem.*, 1983, **26**, 394-403.
- 12 B. Anxionnat, D. Gomez Pardo, G. Ricci, K. Rossen and J. Cossy, *Org. Lett.*, 2013, **15**, 3876-3879.
- 13 B. Teng, J. Shi and C. Yao, *Green Chem.*, 2018, **20**, 2465-2471.
- 14 C. C. D. Wybon, C. Mensch, K. Hollanders, C. Gadais, W. A. Herrebout, S. Ballet and B. U. W. Maes, *ACS Catal.*, 2018, **8**, 203-218.
- 15 X. Sang, X. Hu, R. Tao, Y. Zhang, H. Zhu and D. Wang, *ChemPlusChem*, 2020, **85**, 123-129.
- 16 T. Zweifel, J.-V. Naubron and H. Grützmacher, *Angew. Chem., Int. Ed.*, 2009, **48**, 559-563.
- 17 D. Yang, H. Yang and H. Fu, *Chem. Commun.*, 2011, **47**, 2348-2350.
- 18 S. Luliński and K. Zajac, *J. Org. Chem.*, 2008, **73**, 7785-7788.
- 19 T. Ohishi, M. Nishiura and Z. Hou, *Angew. Chem., Int. Ed.*, 2008, **47**, 5792-5795.
- 20 A. Chacko and B. Mathew, *J. Appl. Polym. Sci.*, 2003, **90**, 3708-3717.
- 21 C. Mukhopadhyay and A. Datta, *Catal. Commun.*, 2008, **9**, 2588-2592.
- 22 F. C. Lopez, A. Shankar, M. Thompson, B. Shealy, D. Locklear, T. Rawalpally, T. Cleary and C. Gagliardi, *Org. Process Res. Dev.*, 2005, **9**, 1003-1008.
- 23 W. Ren, J. Chu, F. Sun and Y. Shi, *Org. Lett.*, 2019, **21**, 5967-5970.
- 24 L. Shen, X. Yang, B. Yang, Q. He and Y. Hu, *Eur. J. Med. Chem.*, 2010, **45**, 11-18.
- 25 M. Liu and C.-J. Li, *Angew. Chem., Int. Ed.*, 2016, **55**, 10806-10810.
- 26 T. Nakashima, *Yakugaku Zasshi*, 1955, **75**, 1012-1013.
- 27 M. Sechi, L. Sannia, F. Carta, M. Palomba, R. Dallochio, A. Dessì, M. Derudas, Z. Zawahir and N. Neamati, *Antivir. Chem. Chemother.*, 2005, **16**, 41-61.
- 28 T. Higa and A. J. Krubsack, *J. Org. Chem.*, 1976, **41**, 3399-3403.
- 29 E. Dalcanale and F. Montanari, *J. Org. Chem.*, 1986, **51**, 567-569.
- 30 L. J. Gooßen, N. Rodríguez, F. Manjolinho and P. P. Lange, *Adv. Synth. Catal.*, 2010, **352**, 2913-2917.
- 31 T. Fukuyama, M. Arai, H. Matsubara and I. Ryu, *J. Org. Chem.*, 2004, **69**, 8105-8107.
- 32 A. B. Chang, T.-P. Lin, N. B. Thompson, S.-X. Luo, A. L. Liberman-Martin, H.-Y. Chen, B. Lee and R. H. Grubbs, *J. Am. Chem. Soc.*, 2017, **139**, 17683-17693.
- 33 D. E. Rajsfus, P. Gilinsky-Sharon and A. A. Frimer, *J. Fluorine Chem.*, 2013, **148**, 59-66.

# <sup>1</sup>H NMR and <sup>13</sup>C NMR spectra of the products

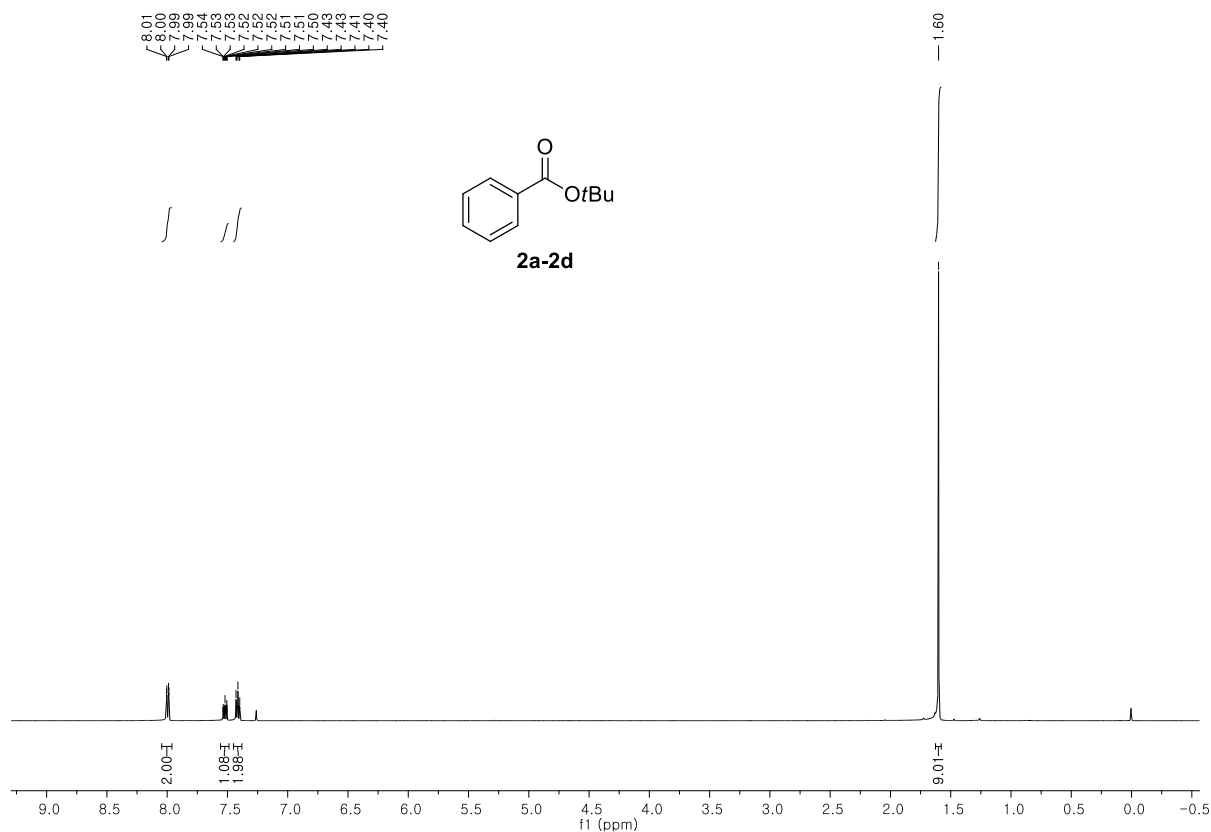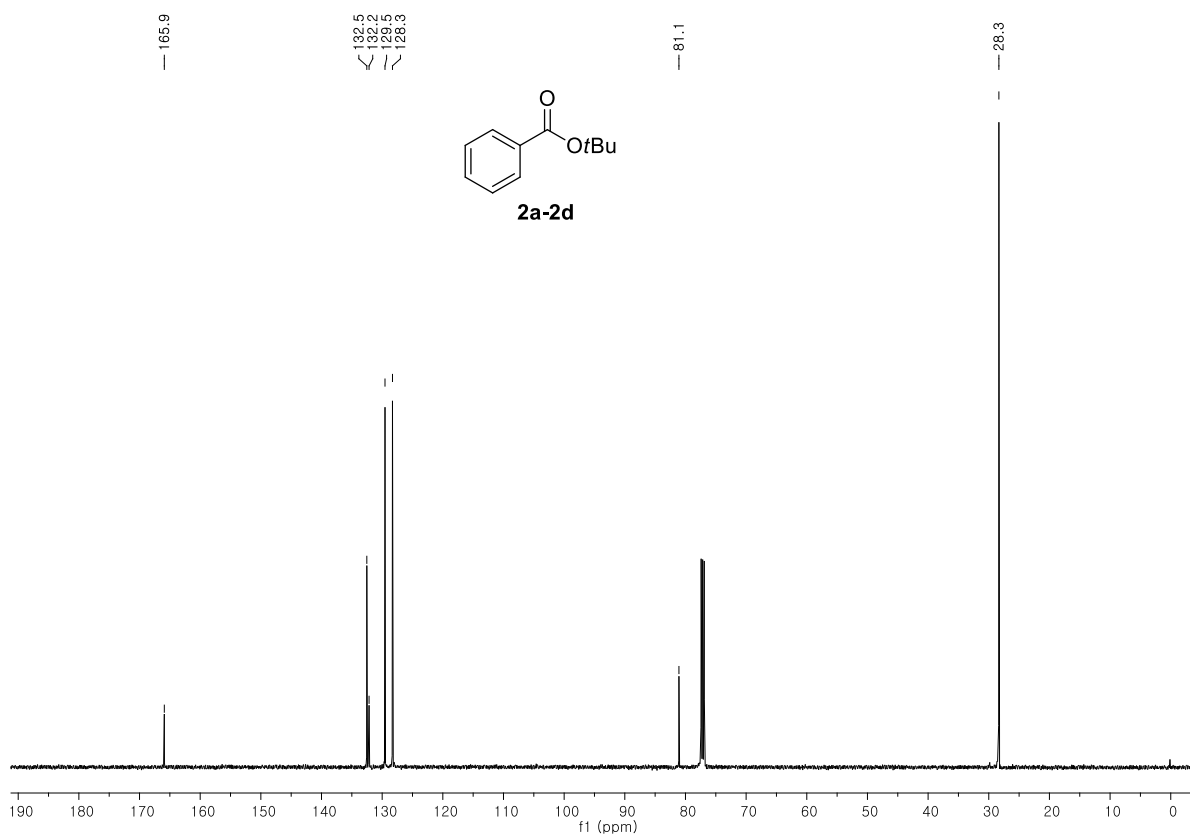

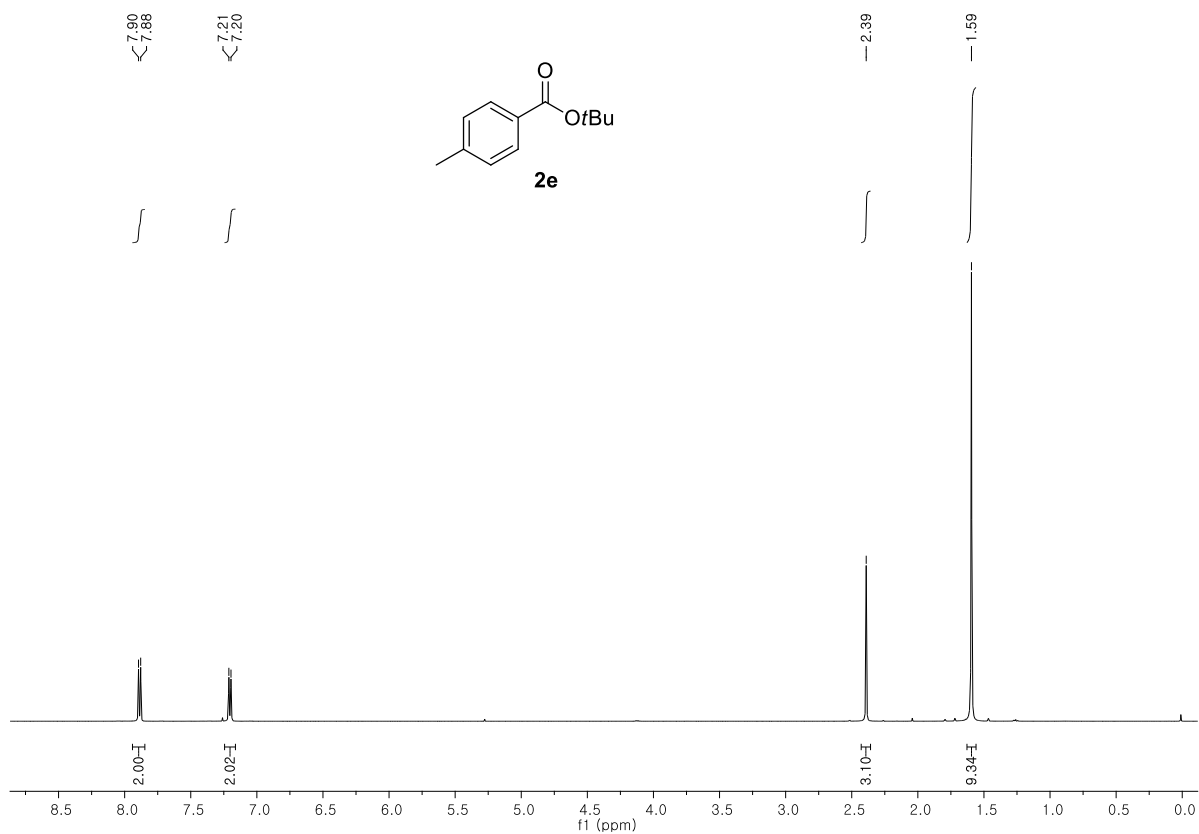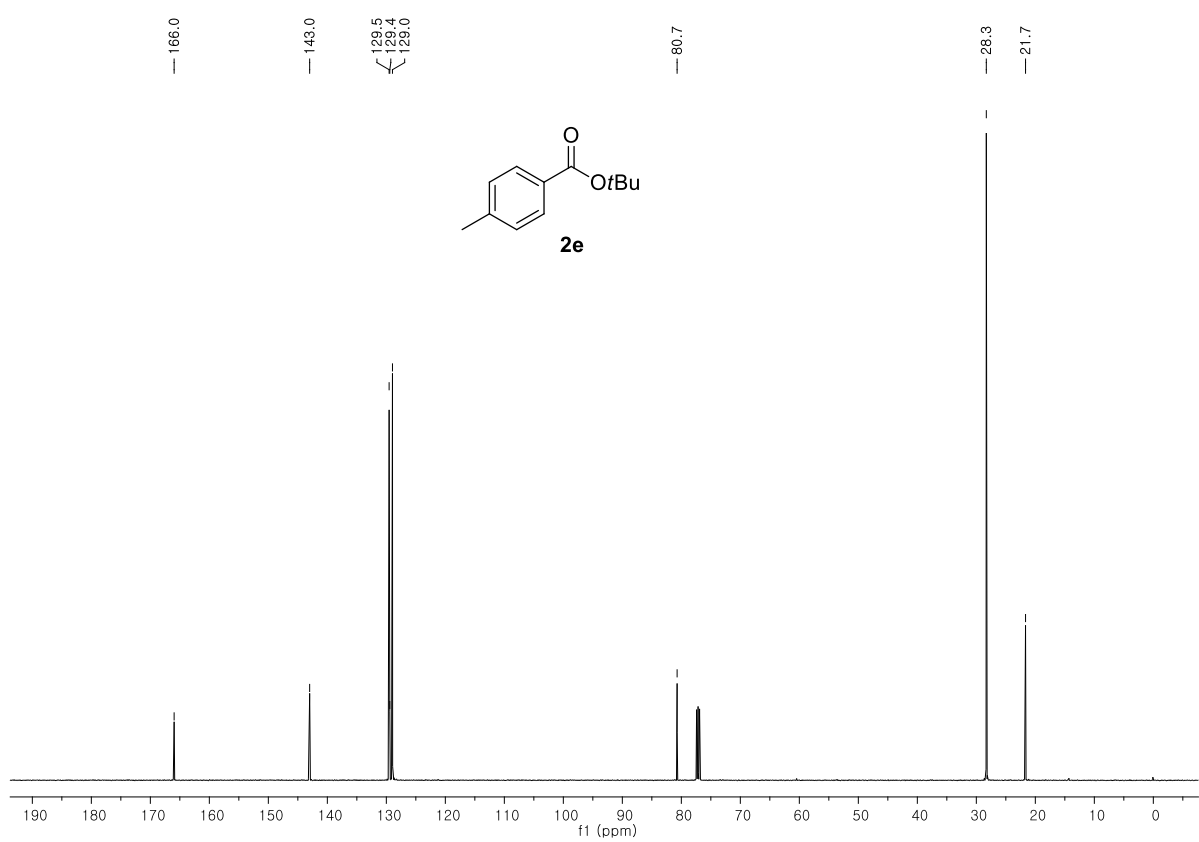

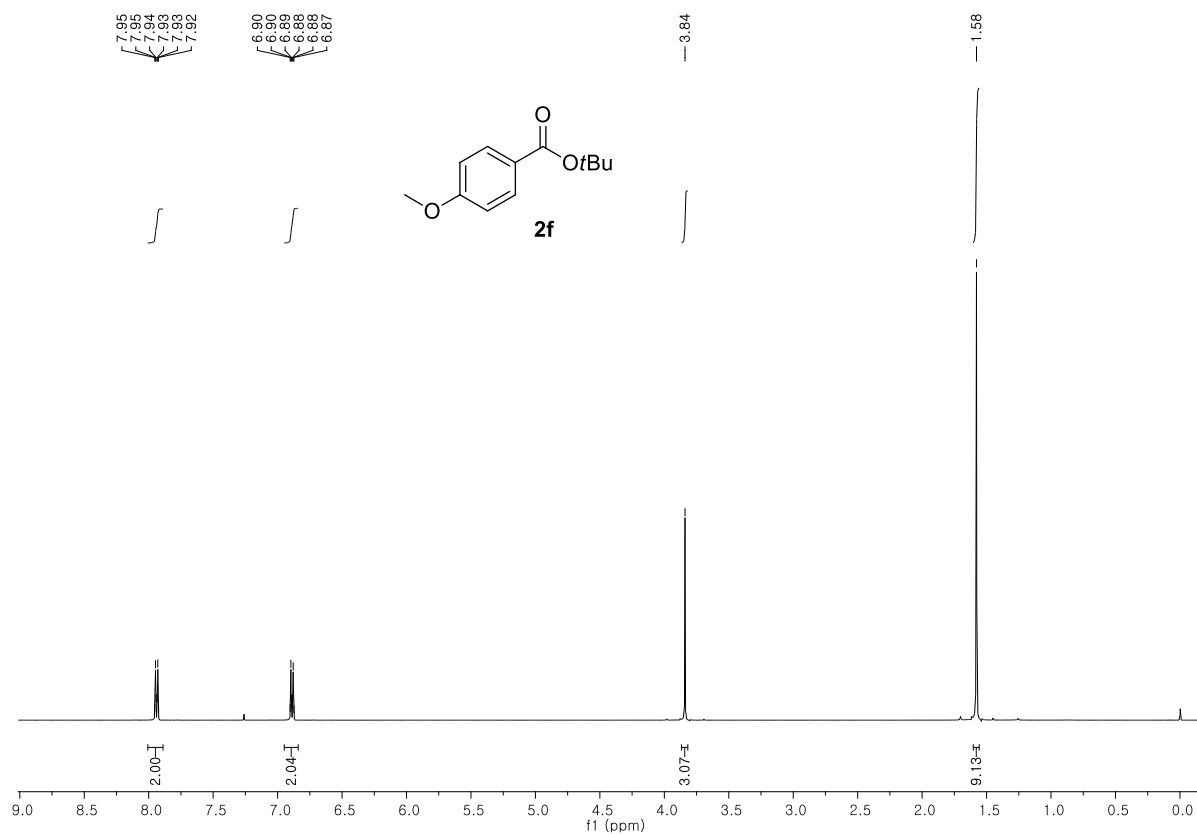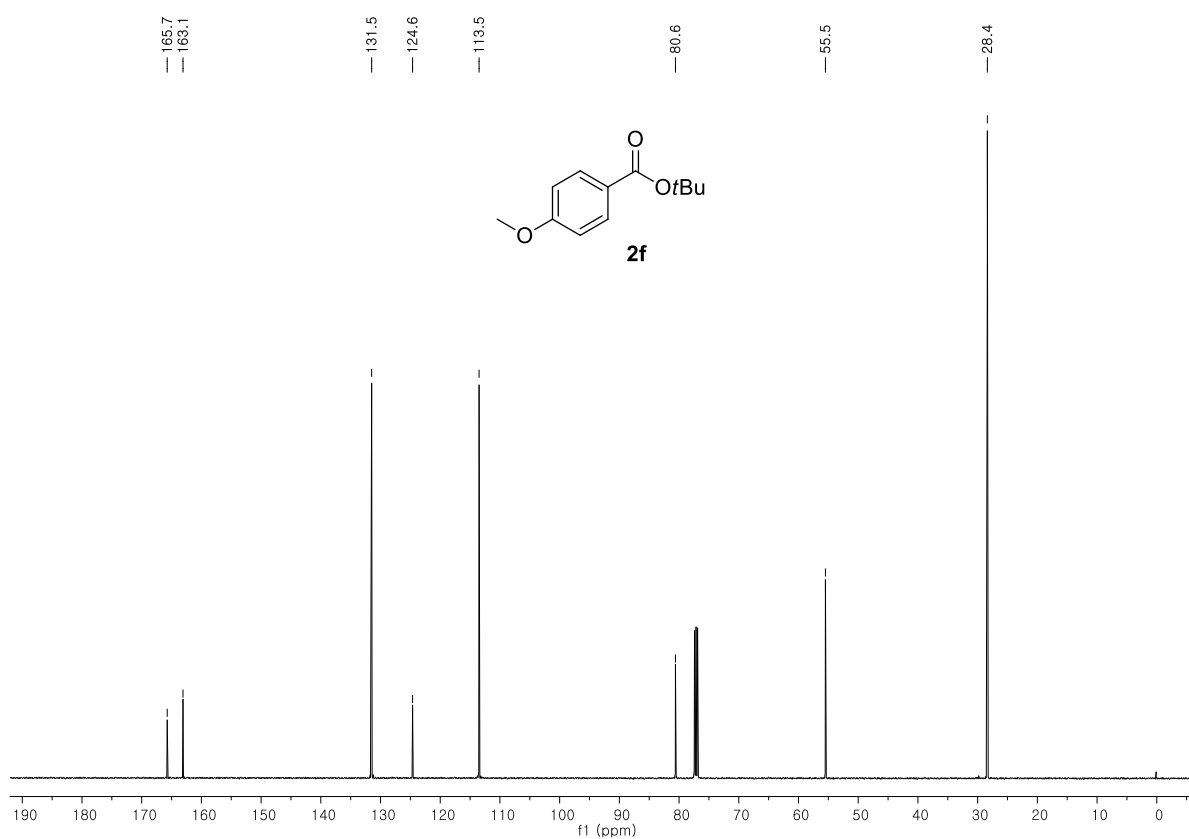

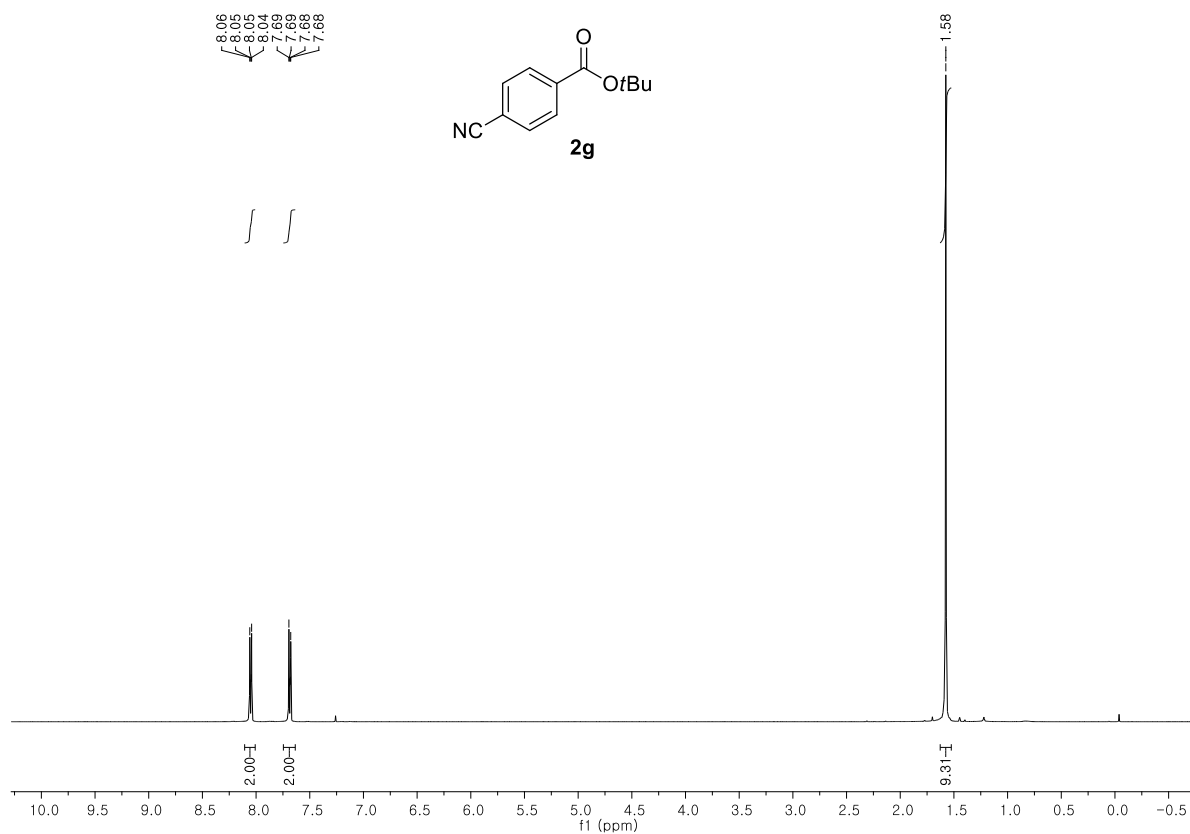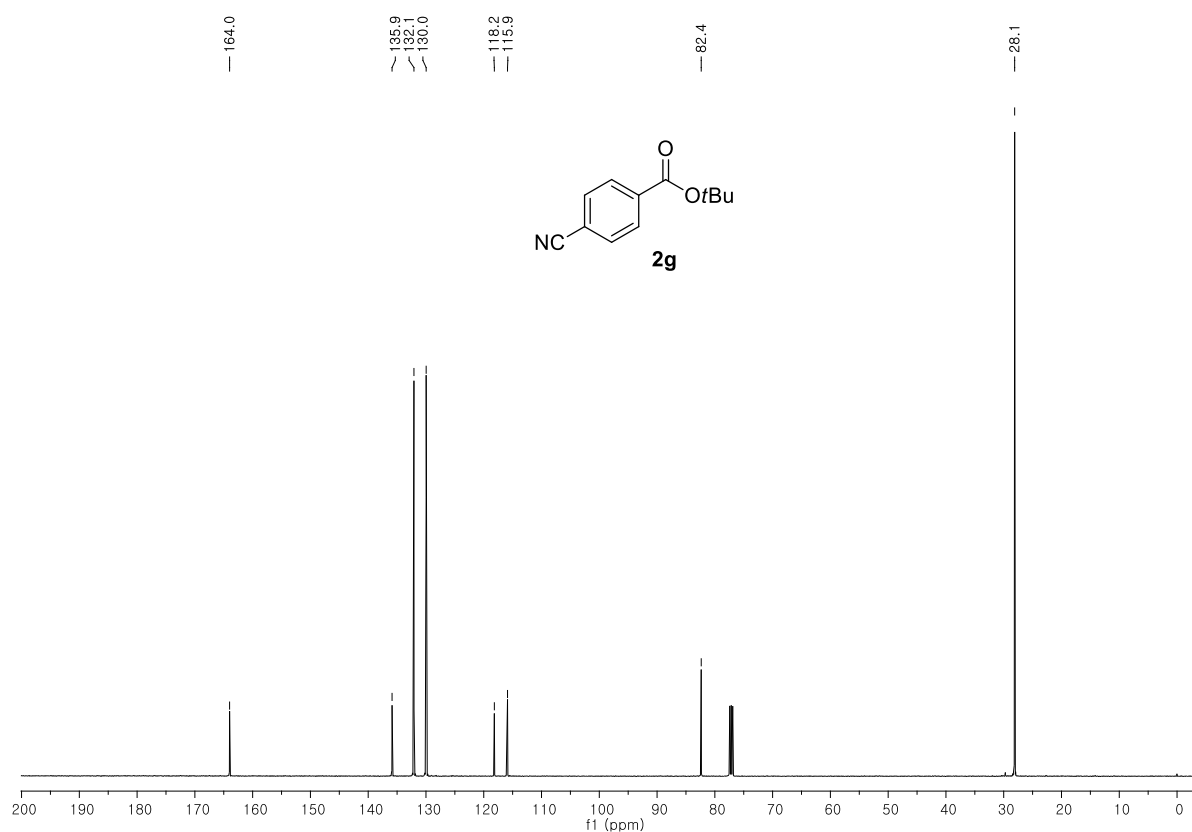

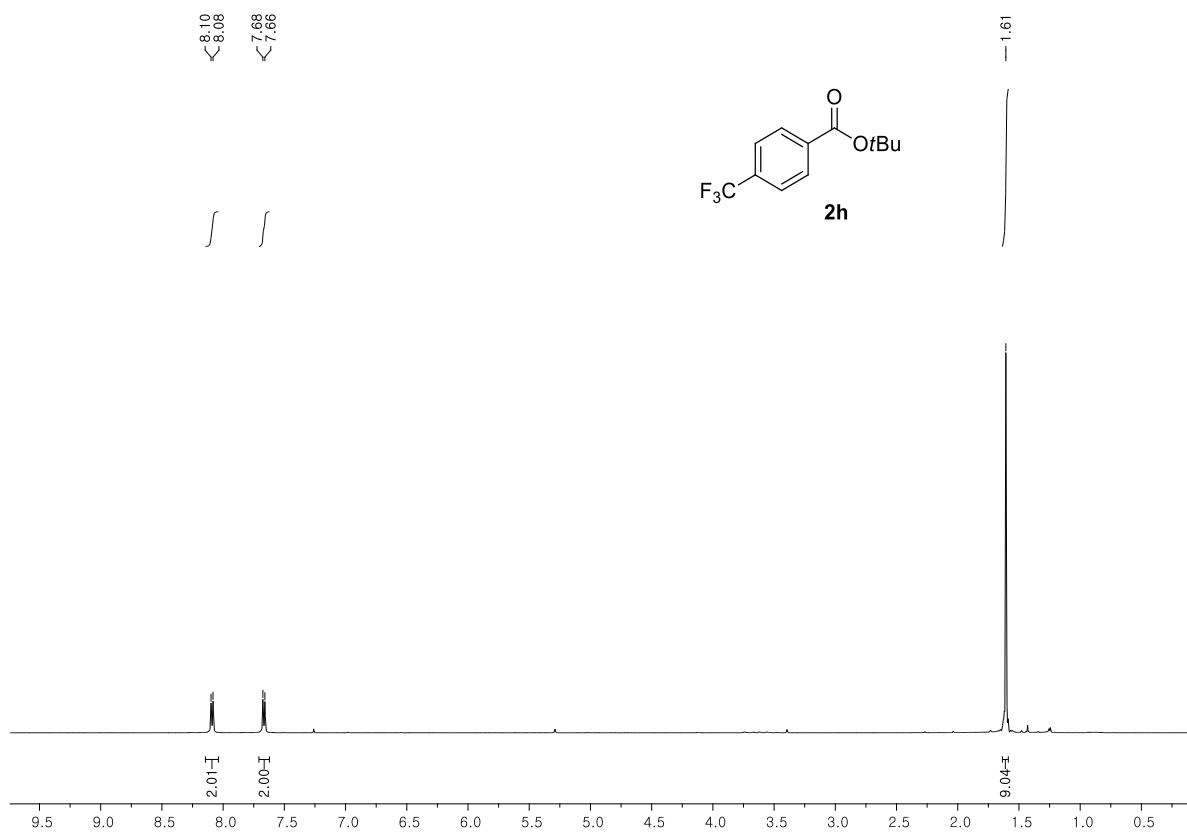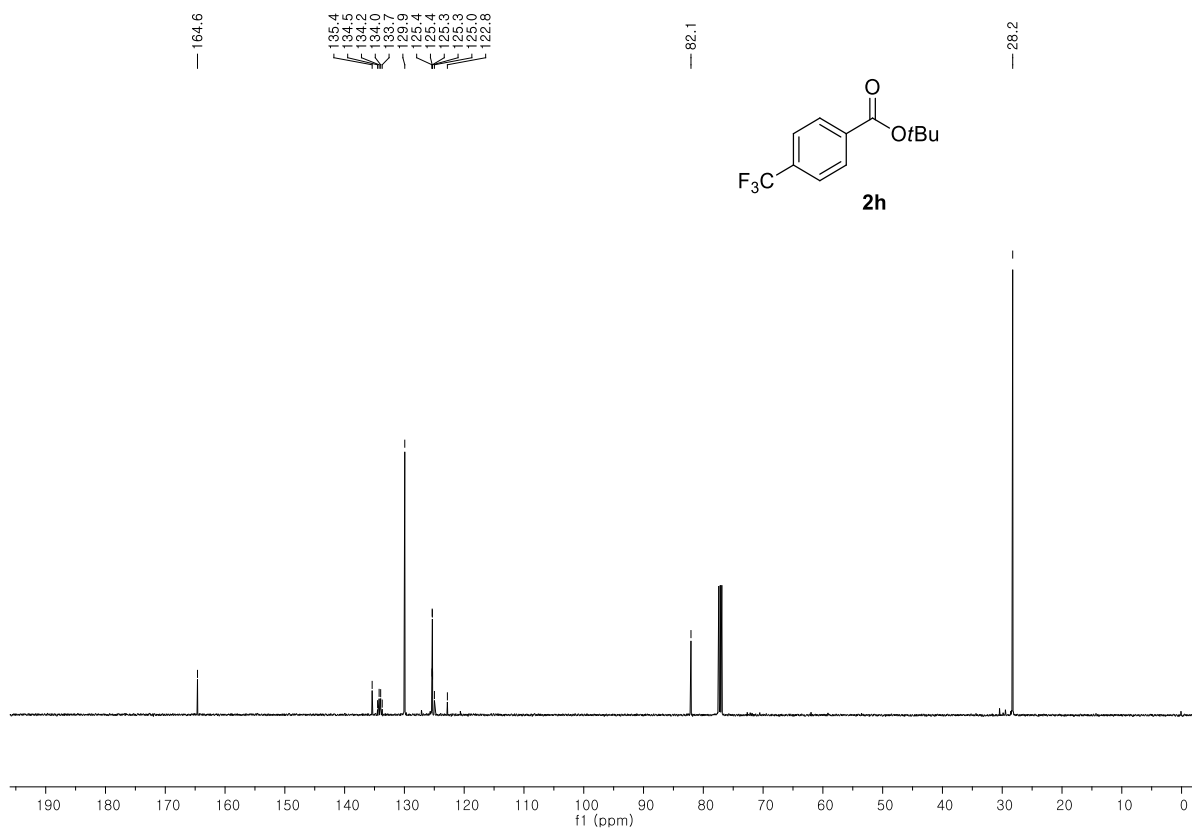

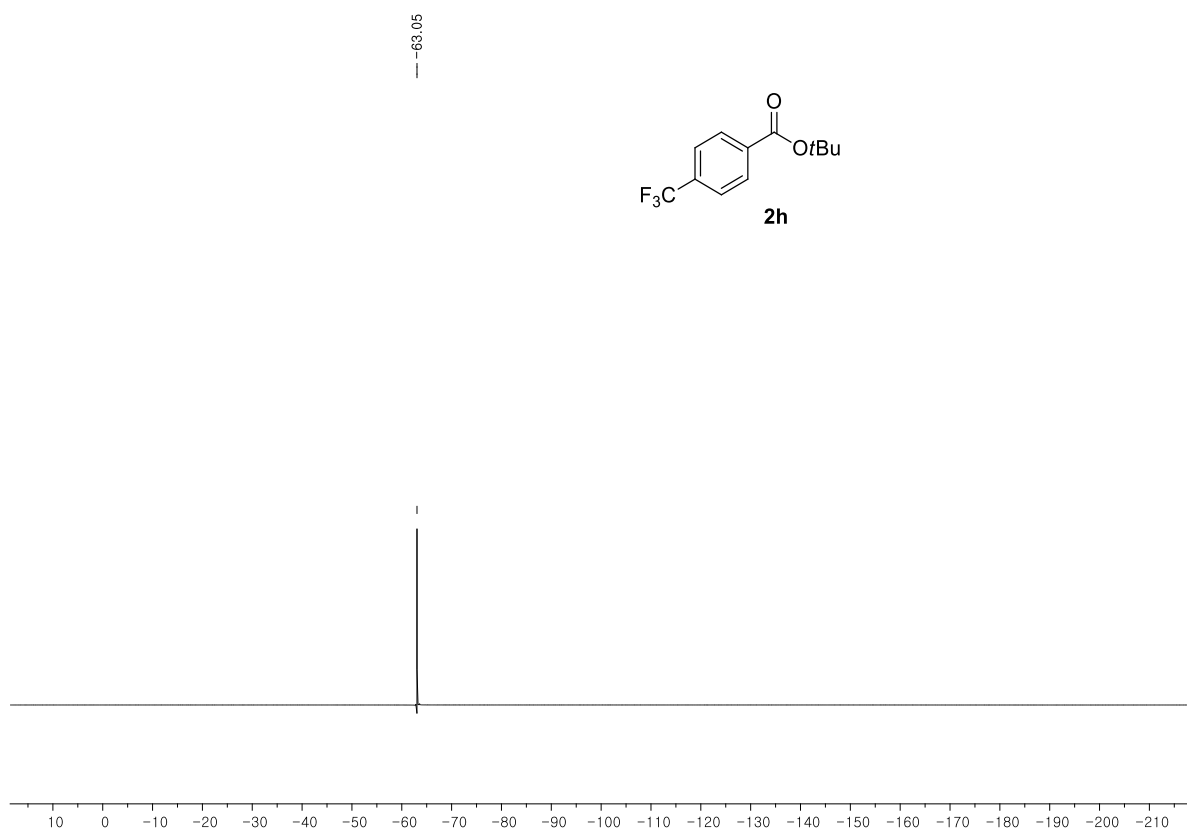

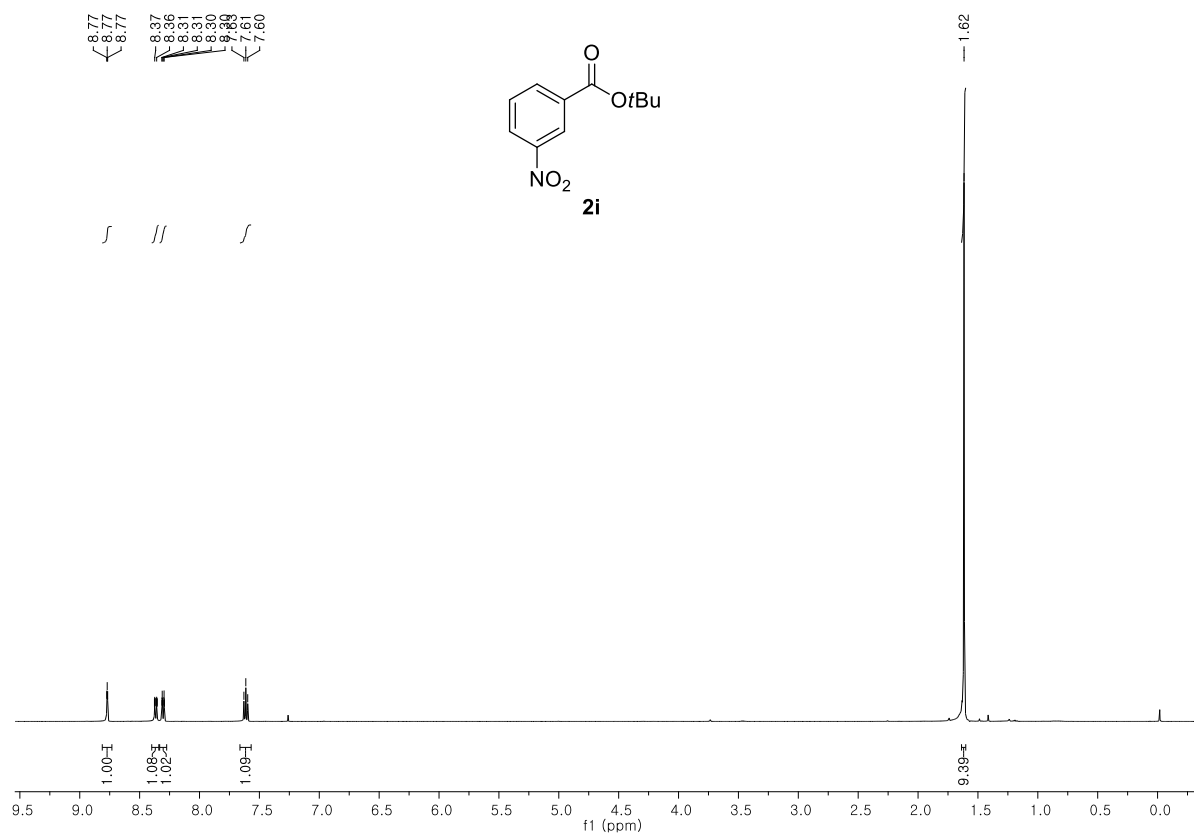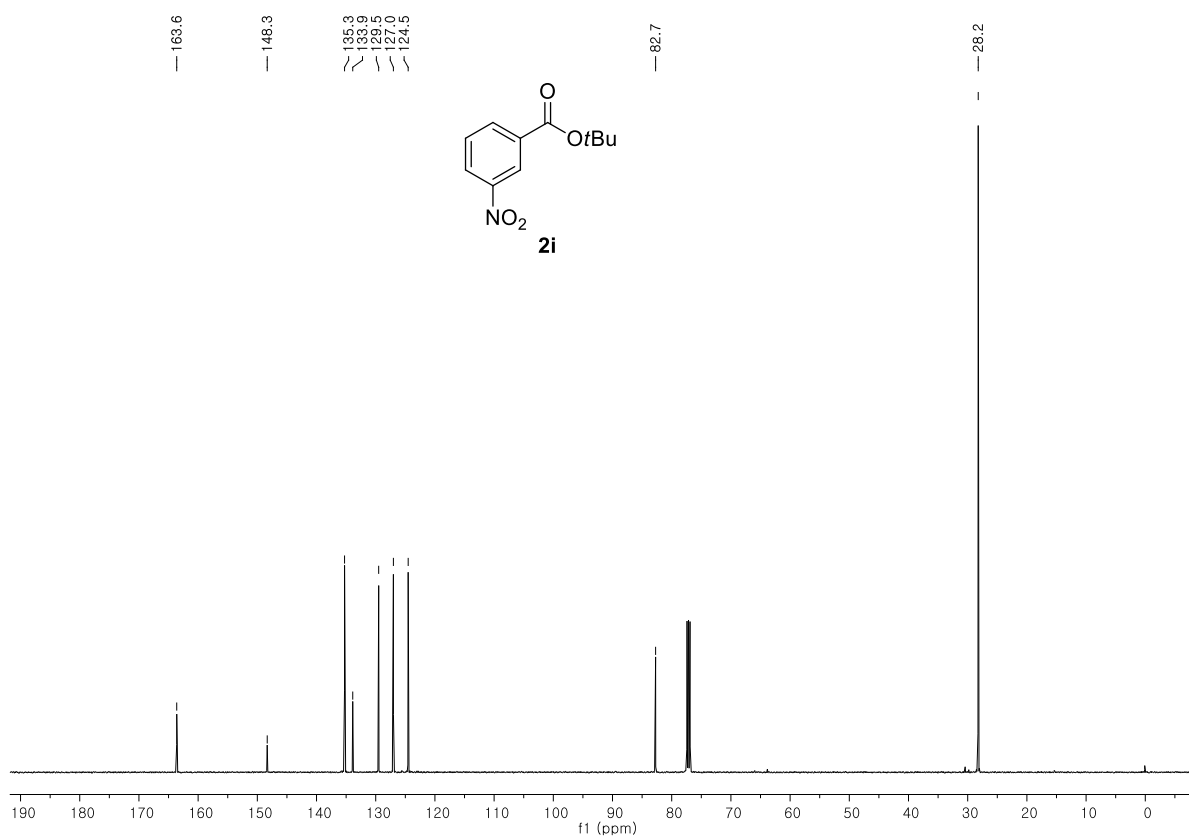

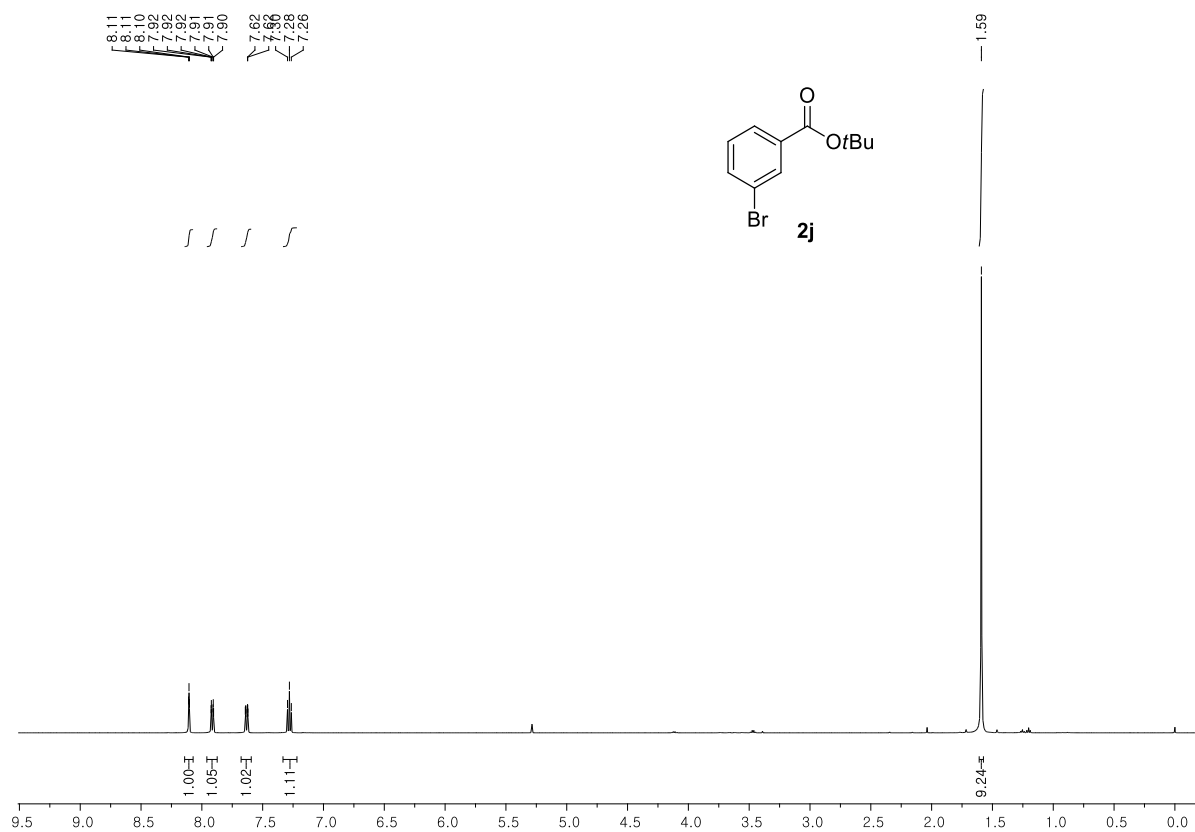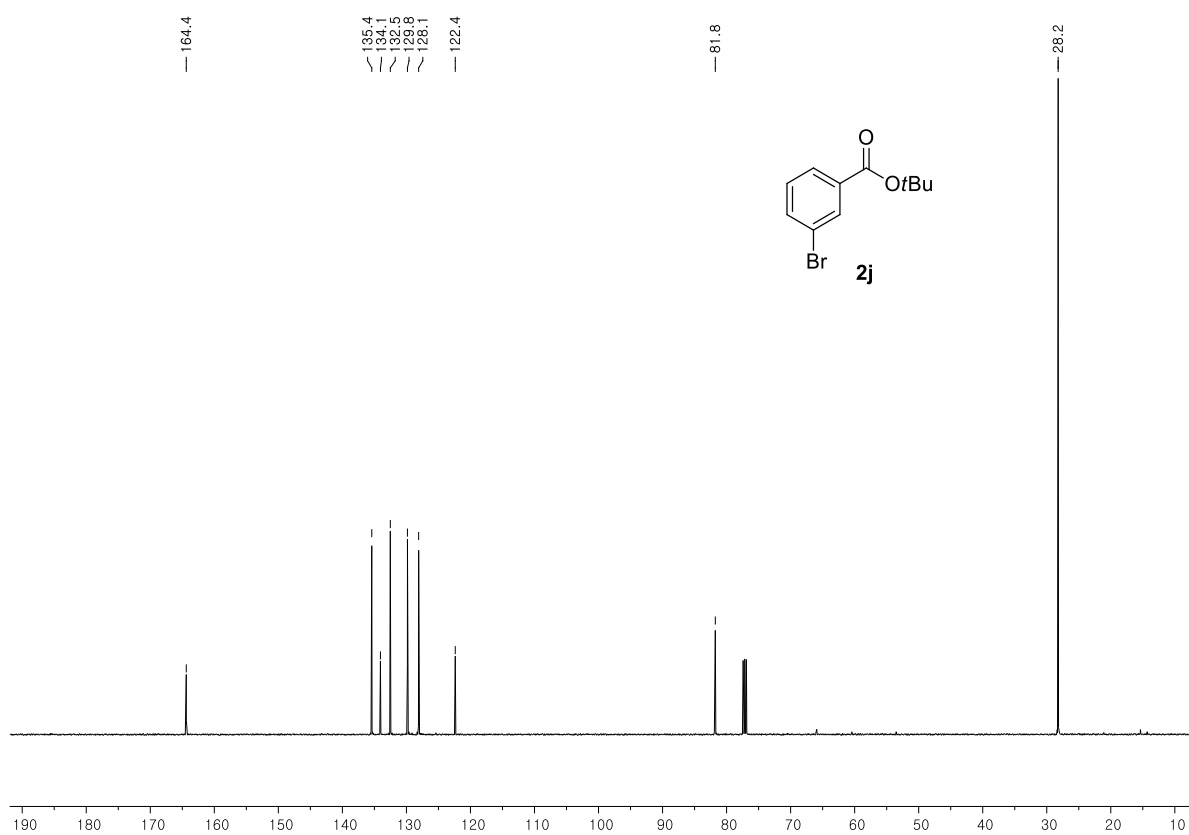

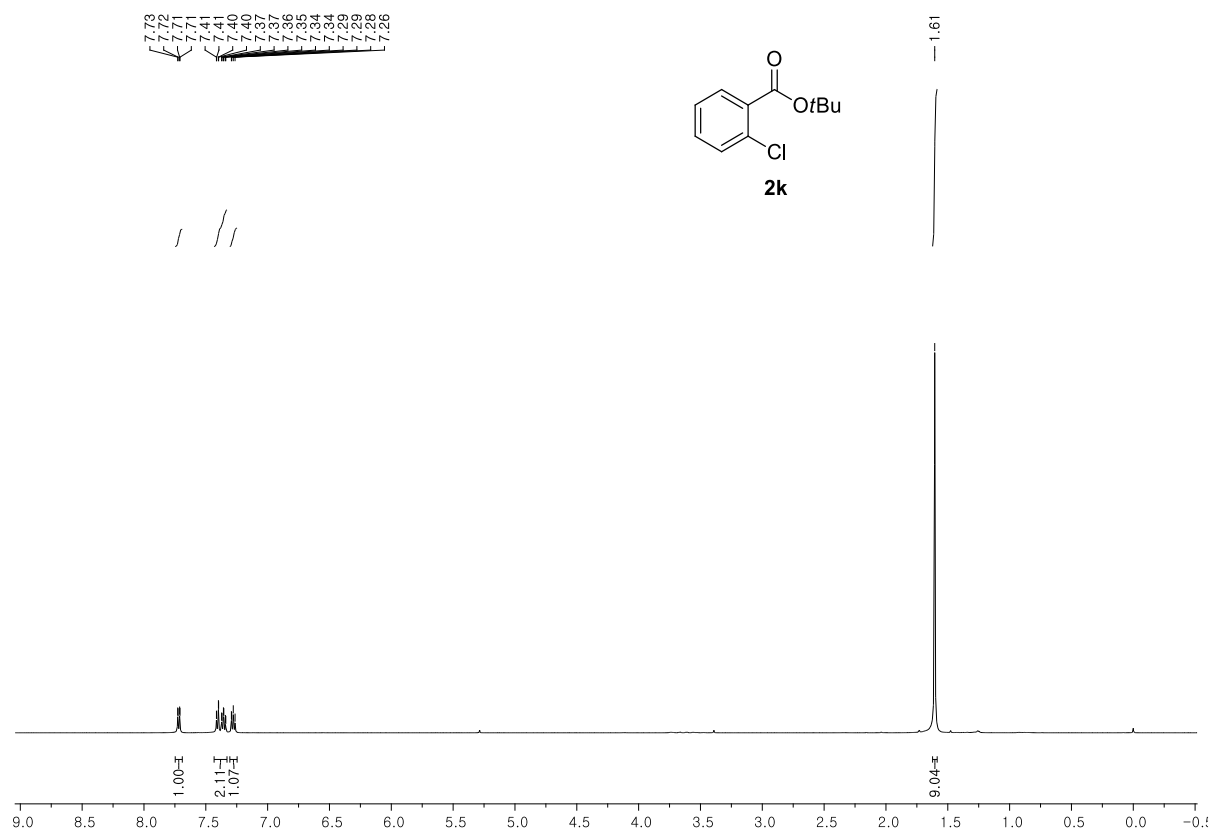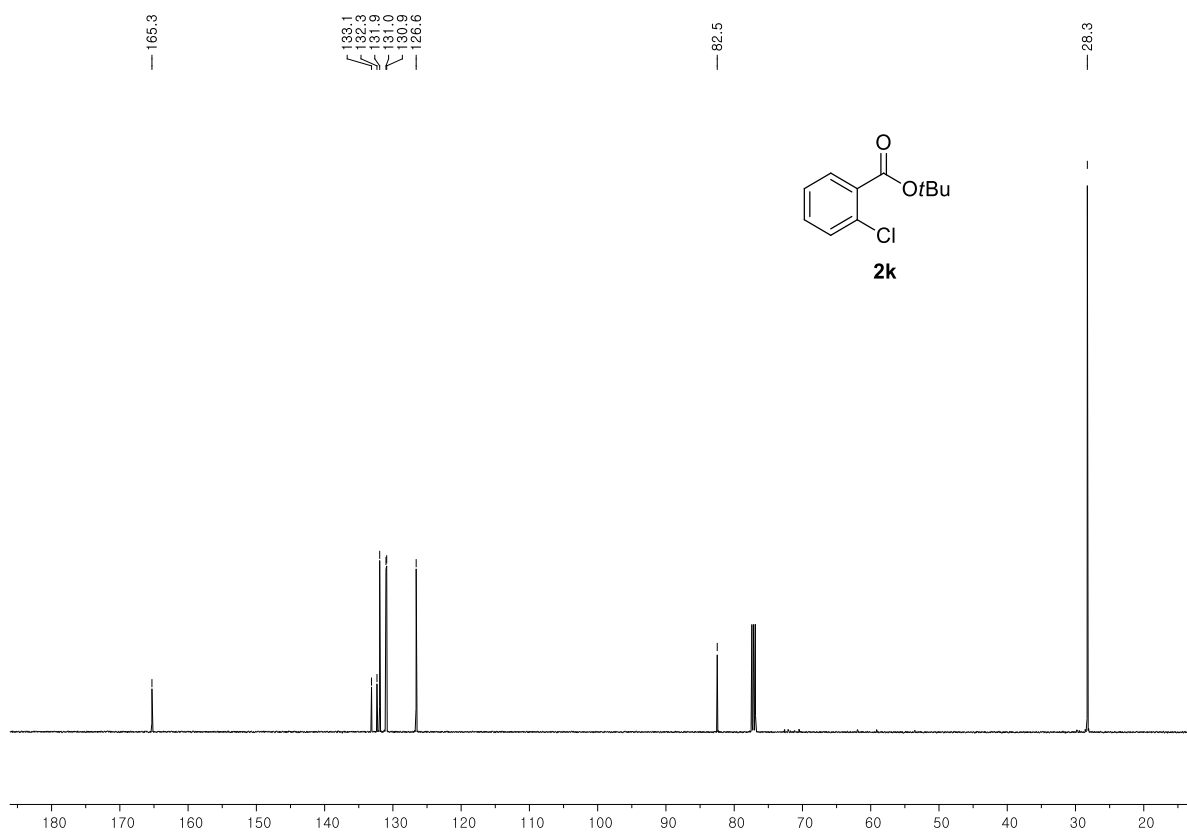

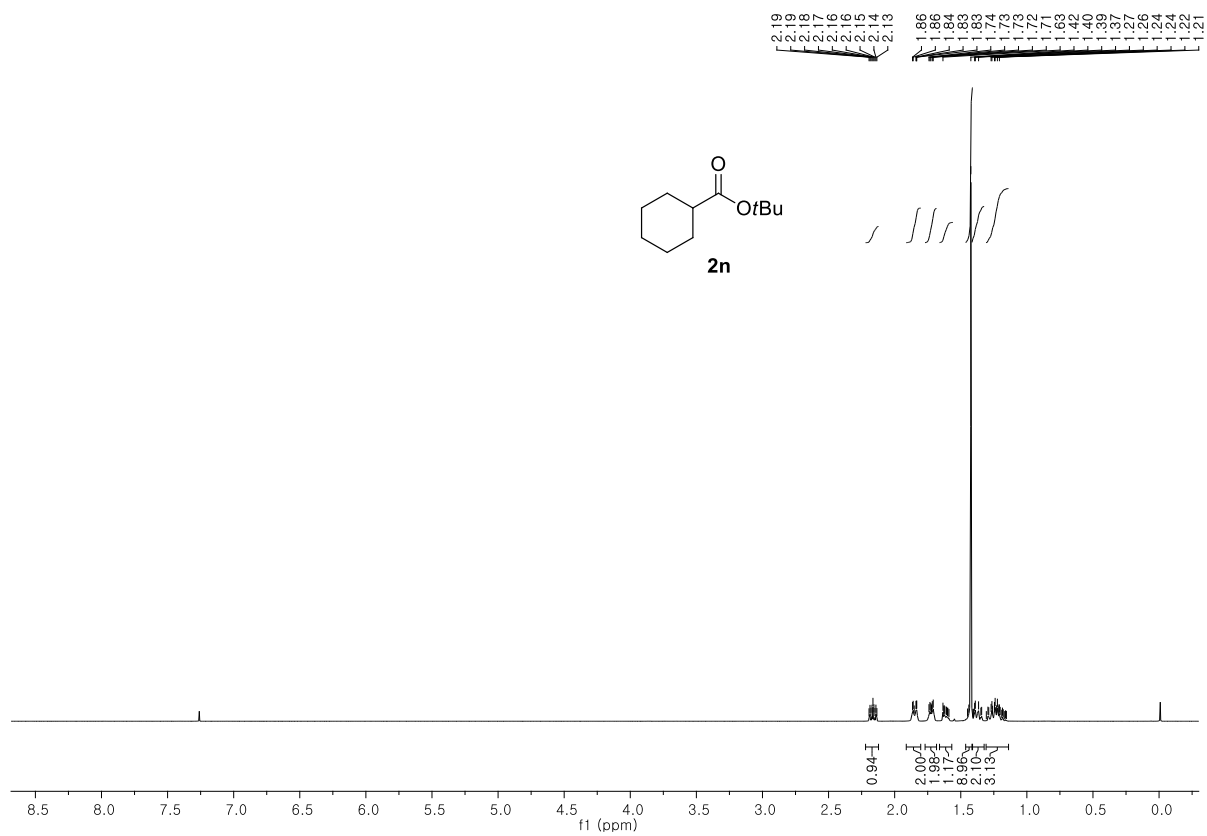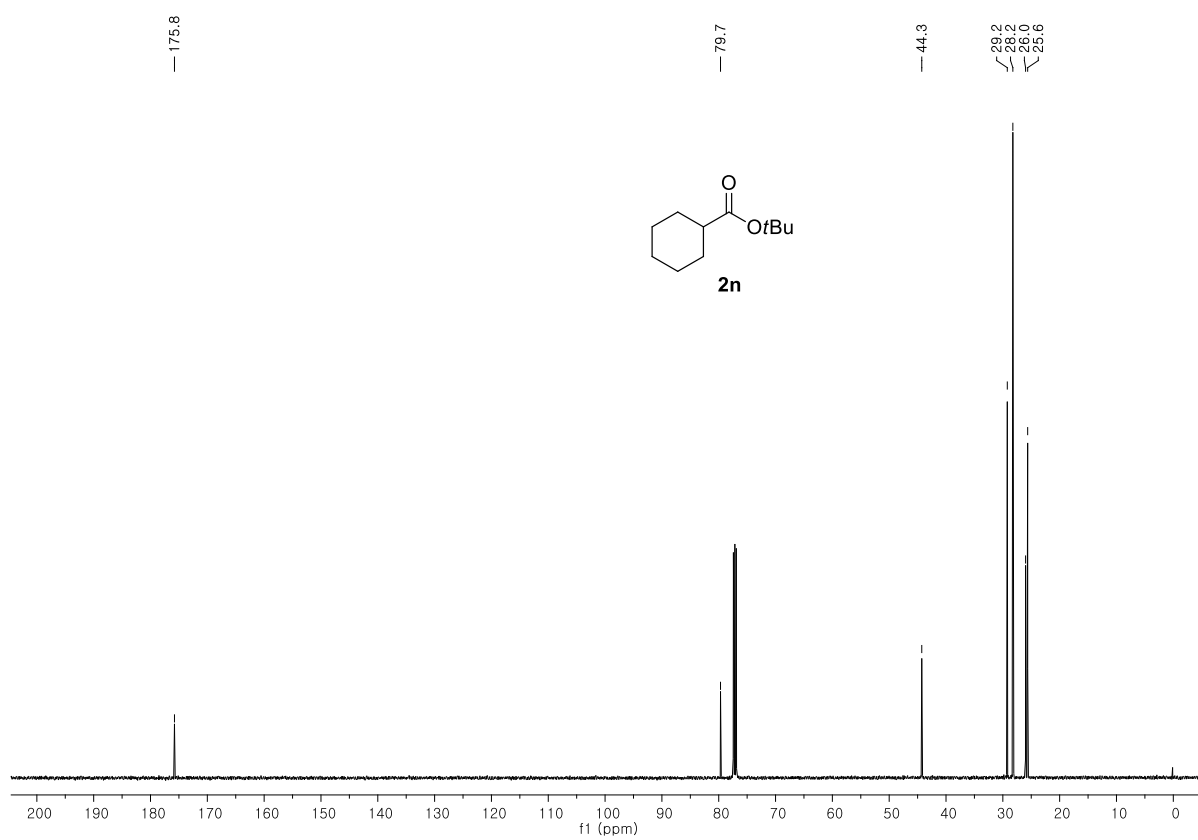

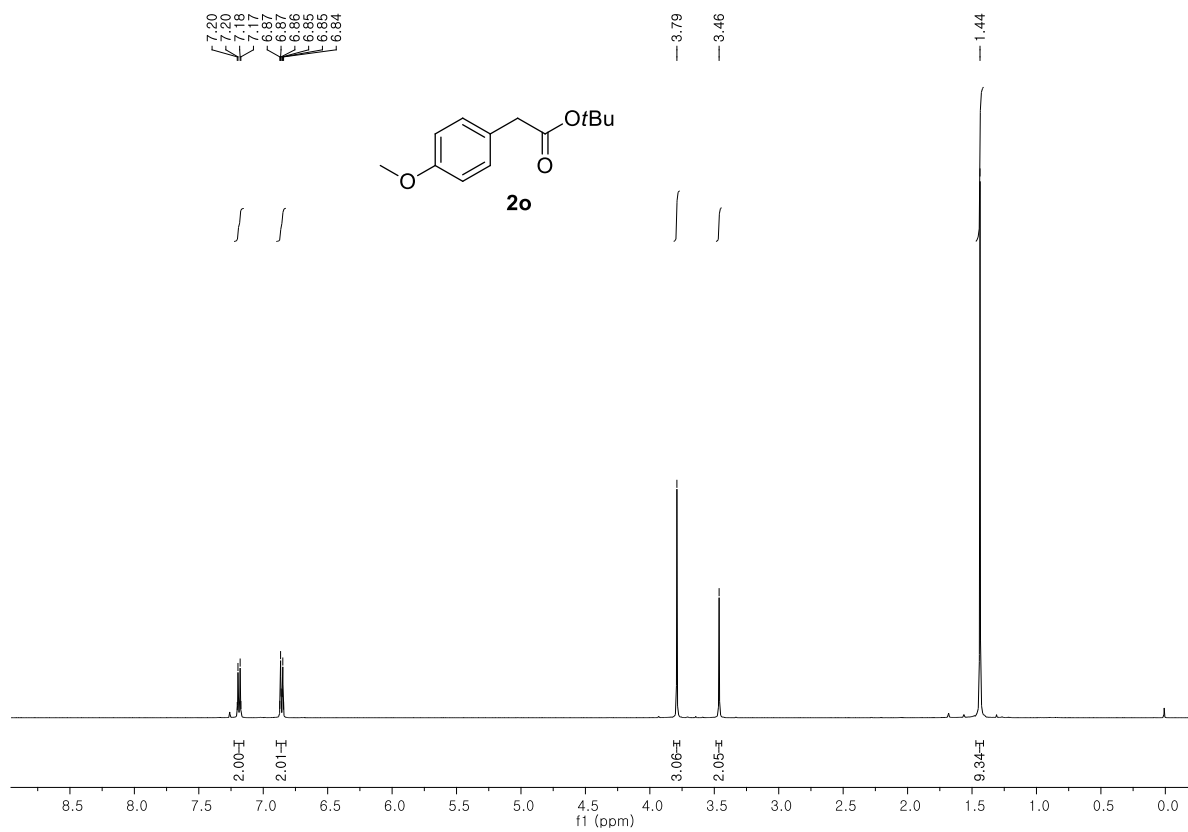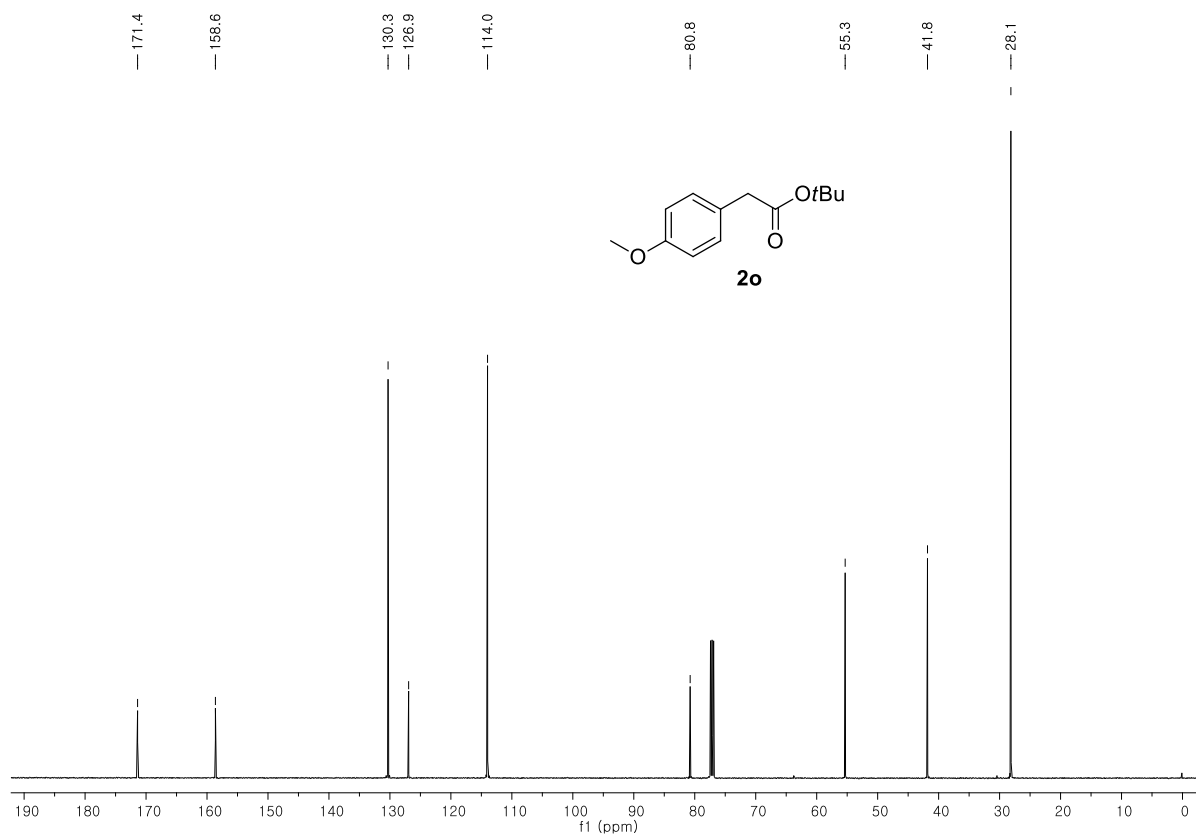

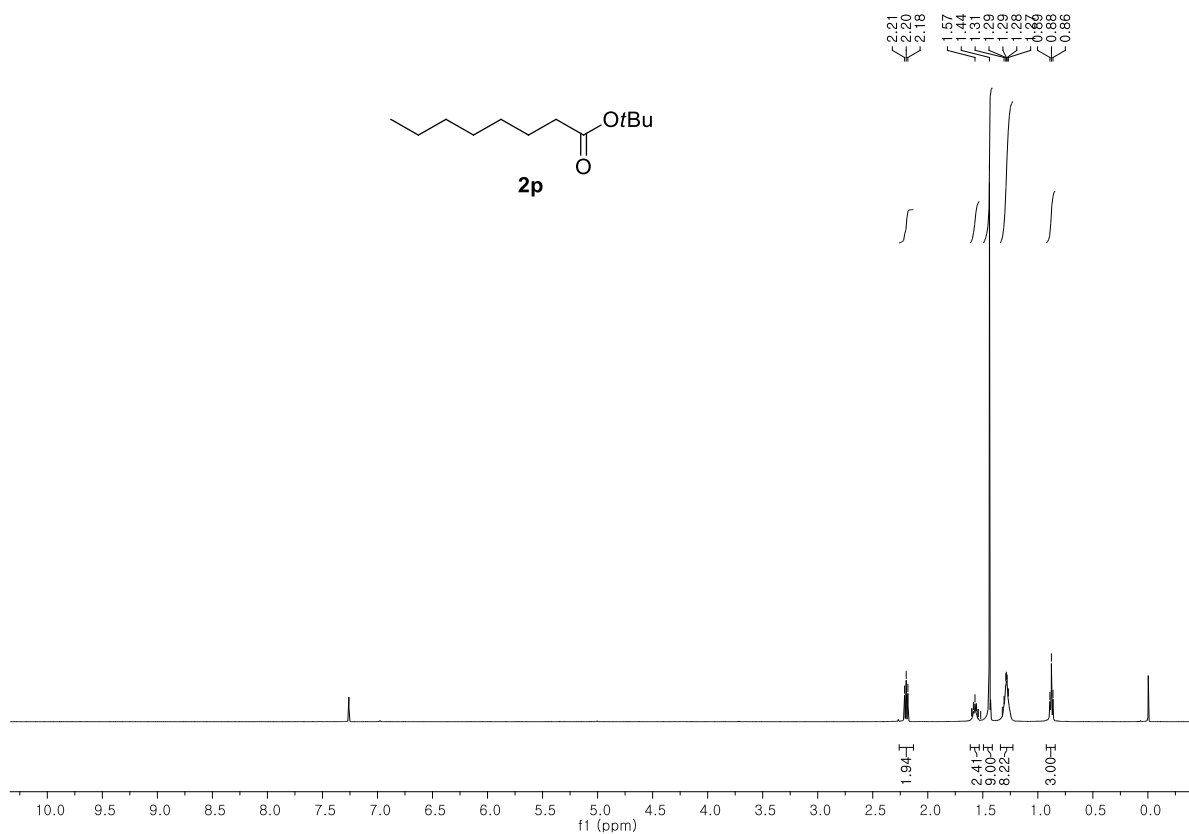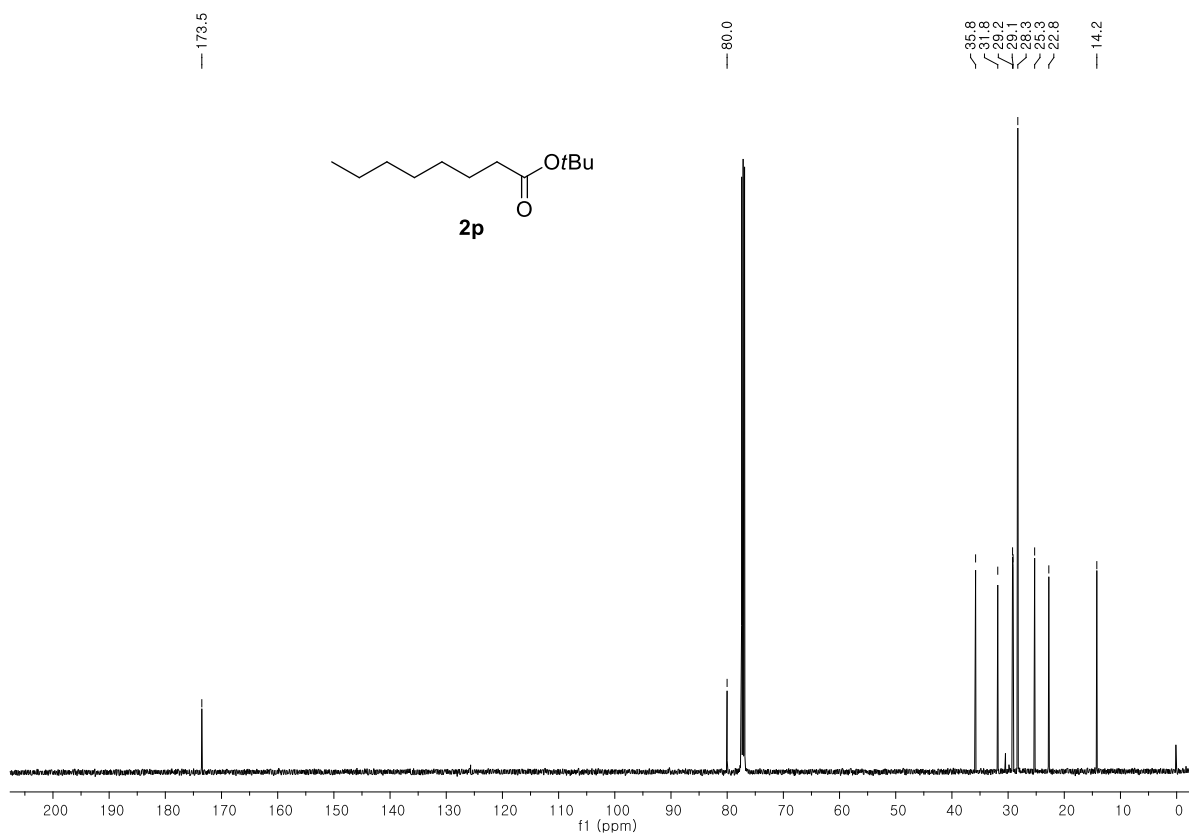

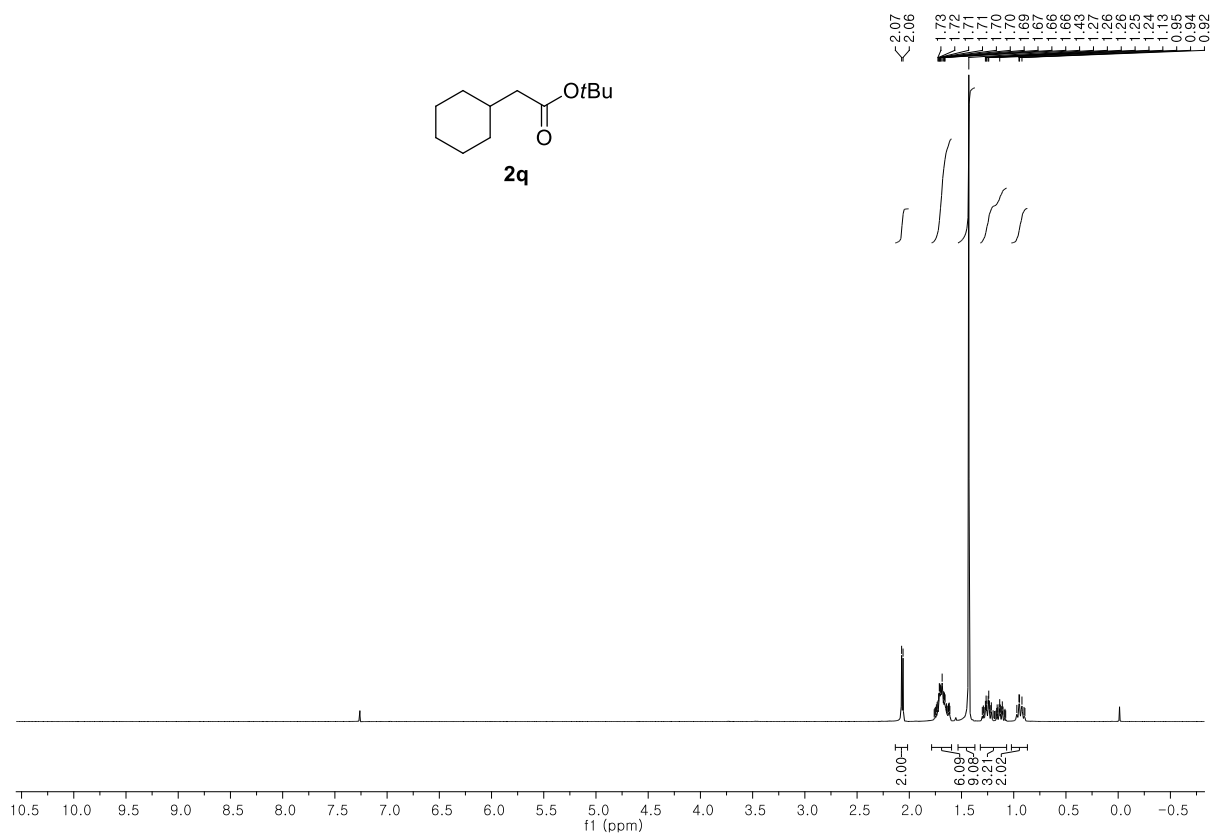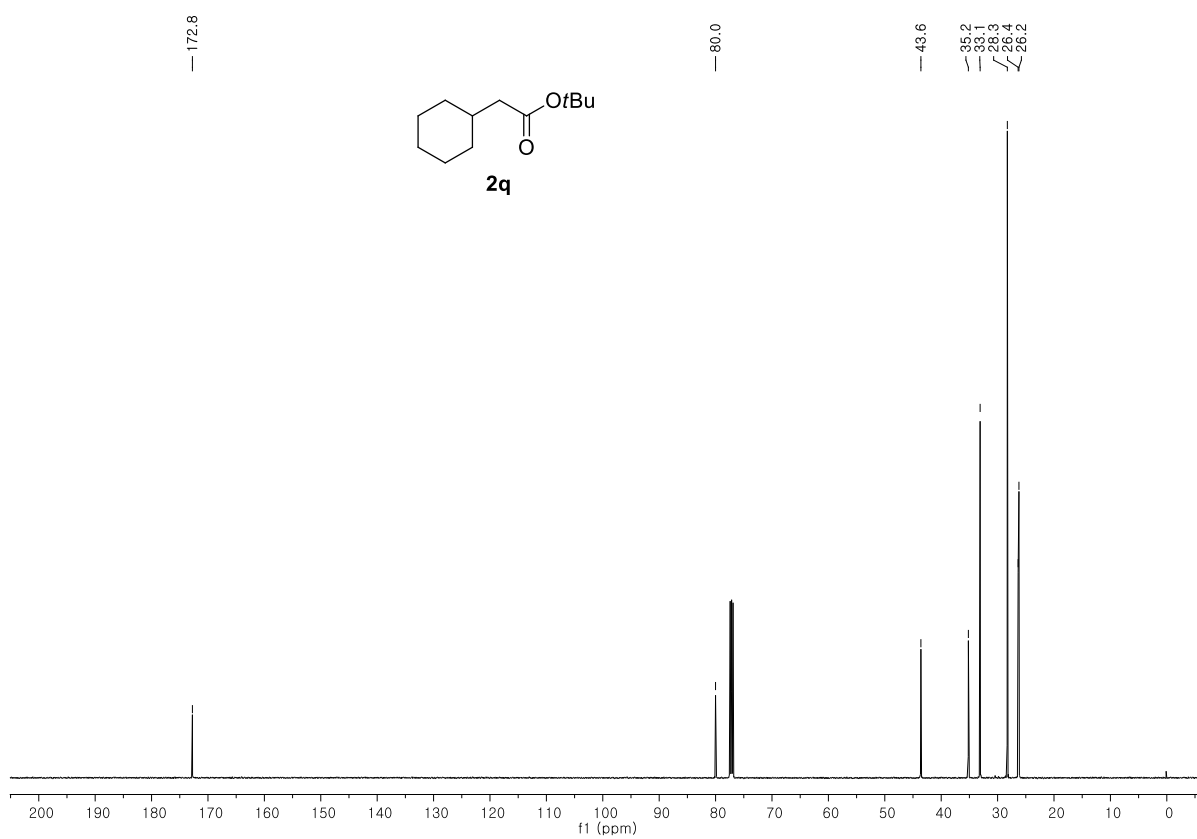

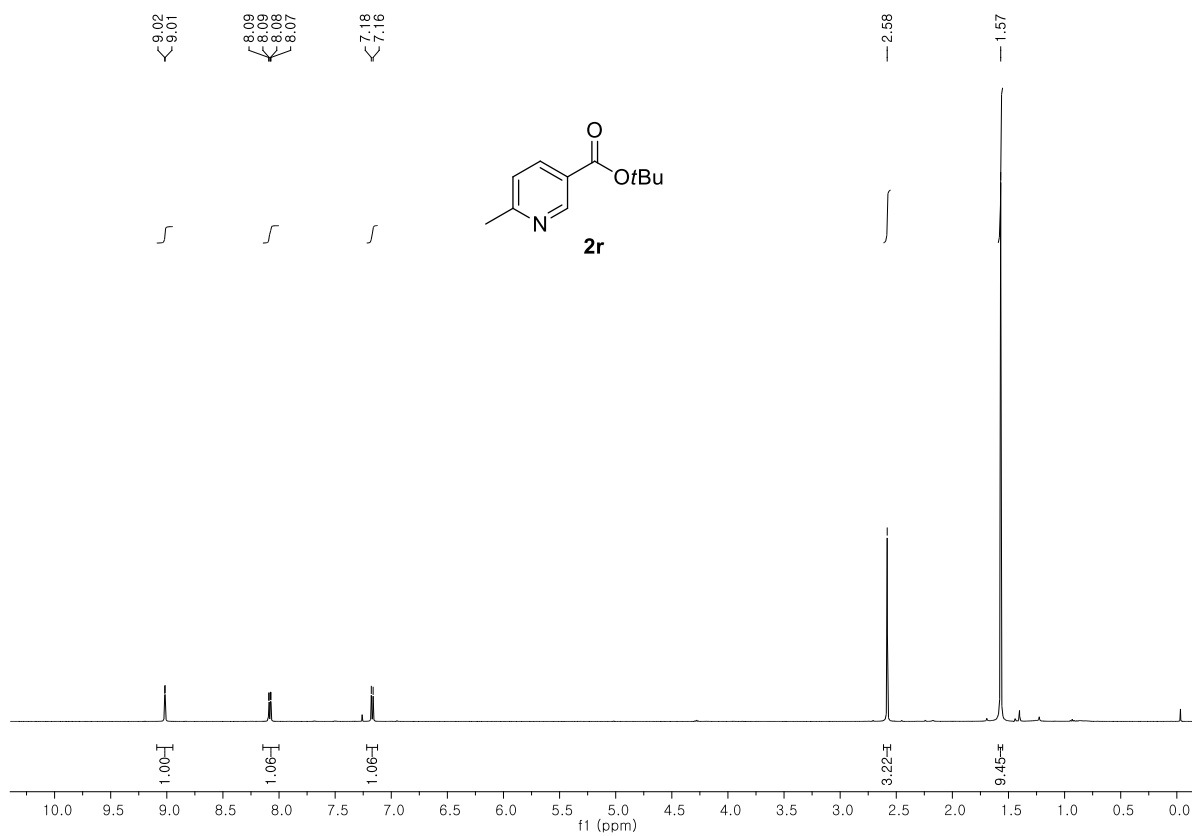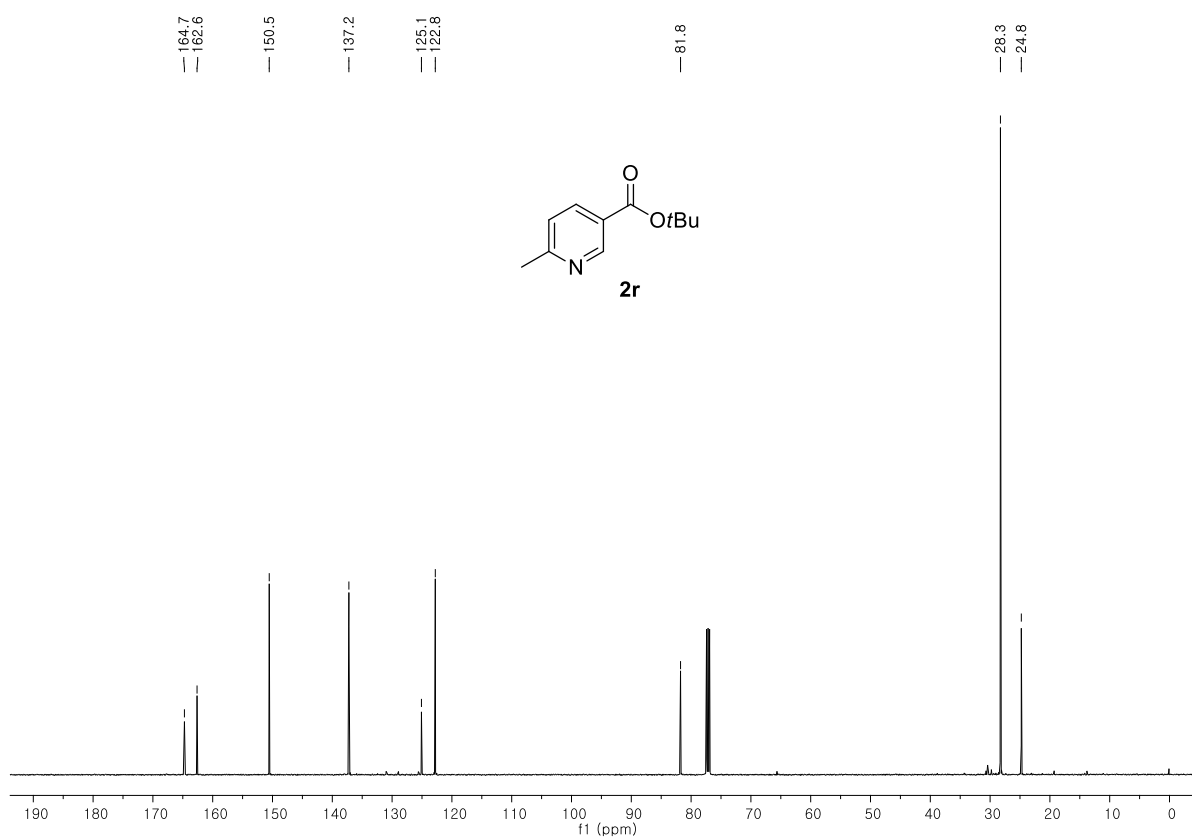

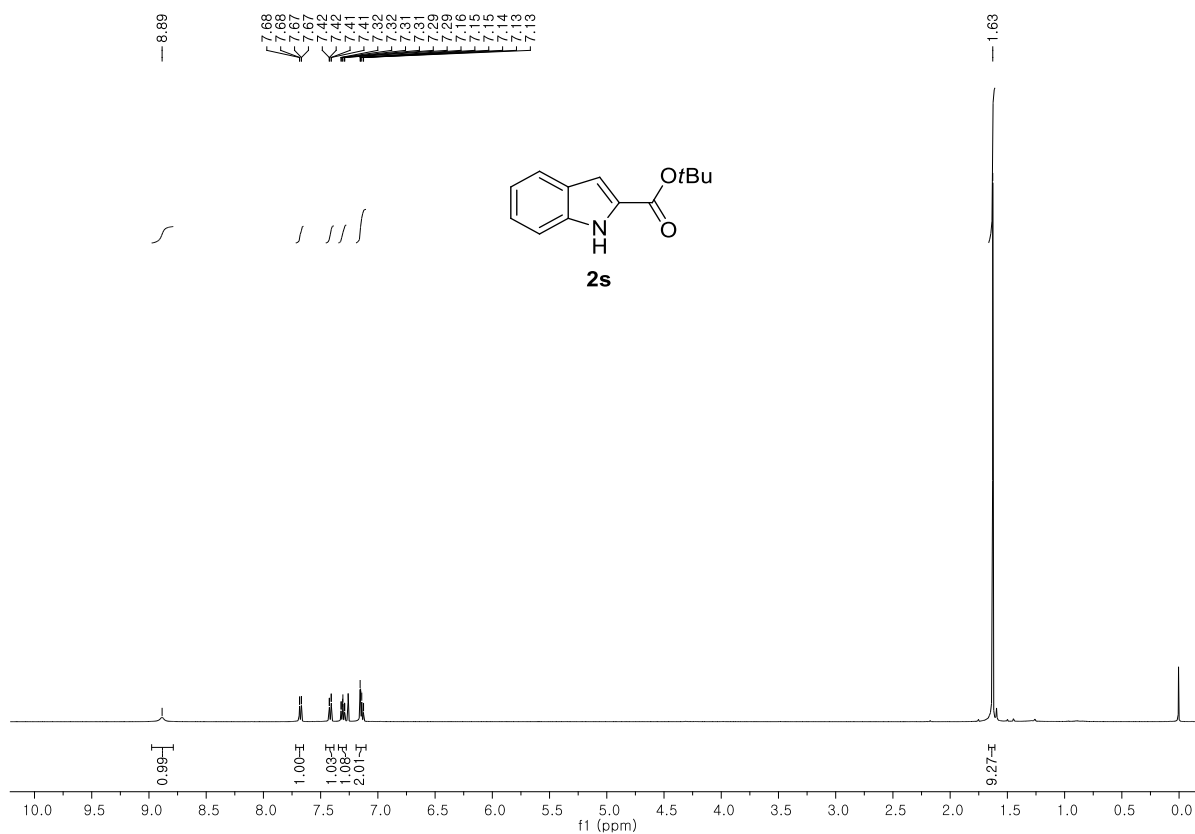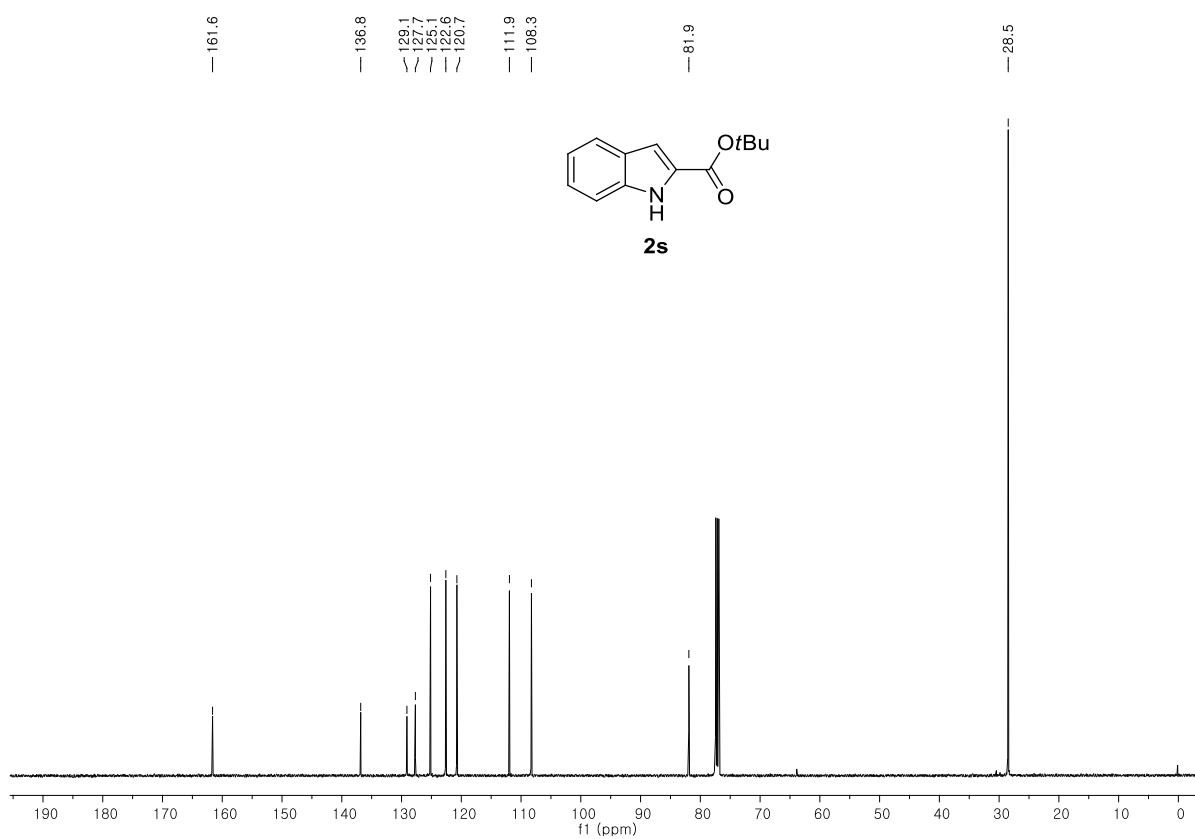

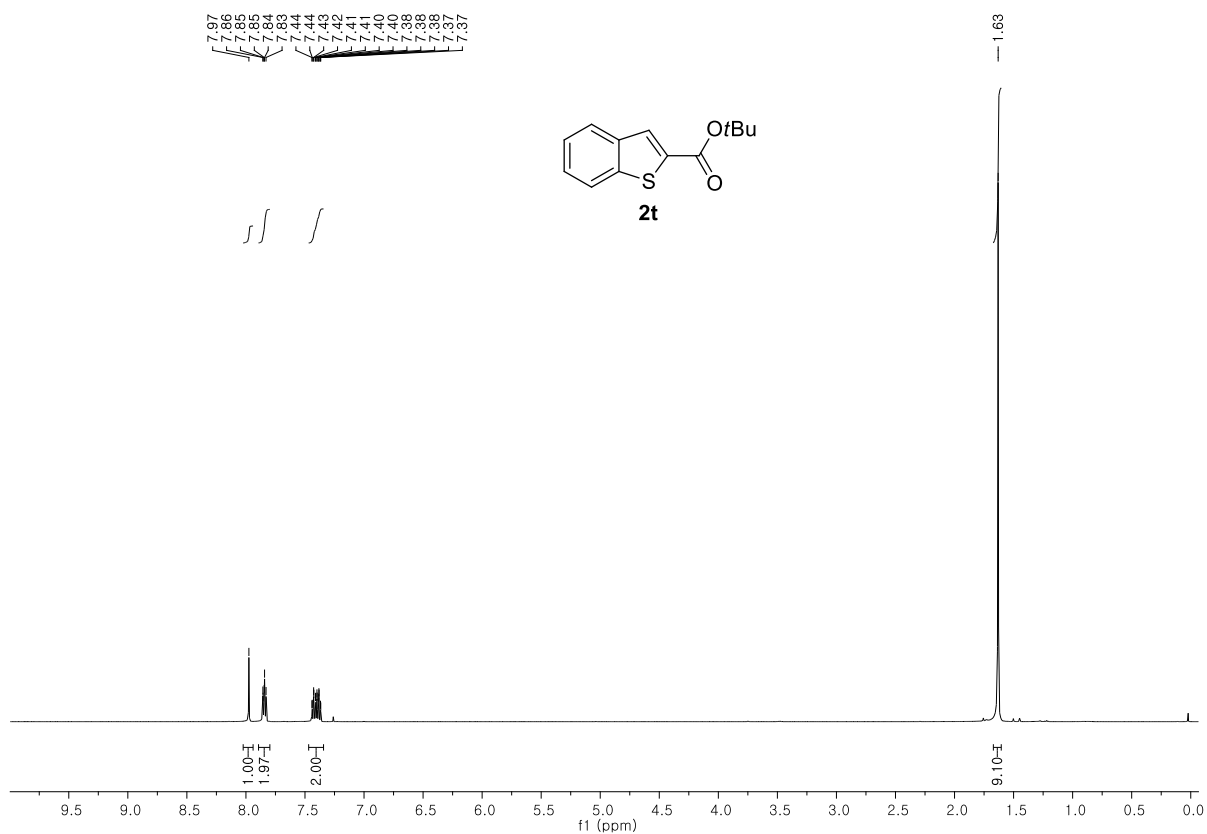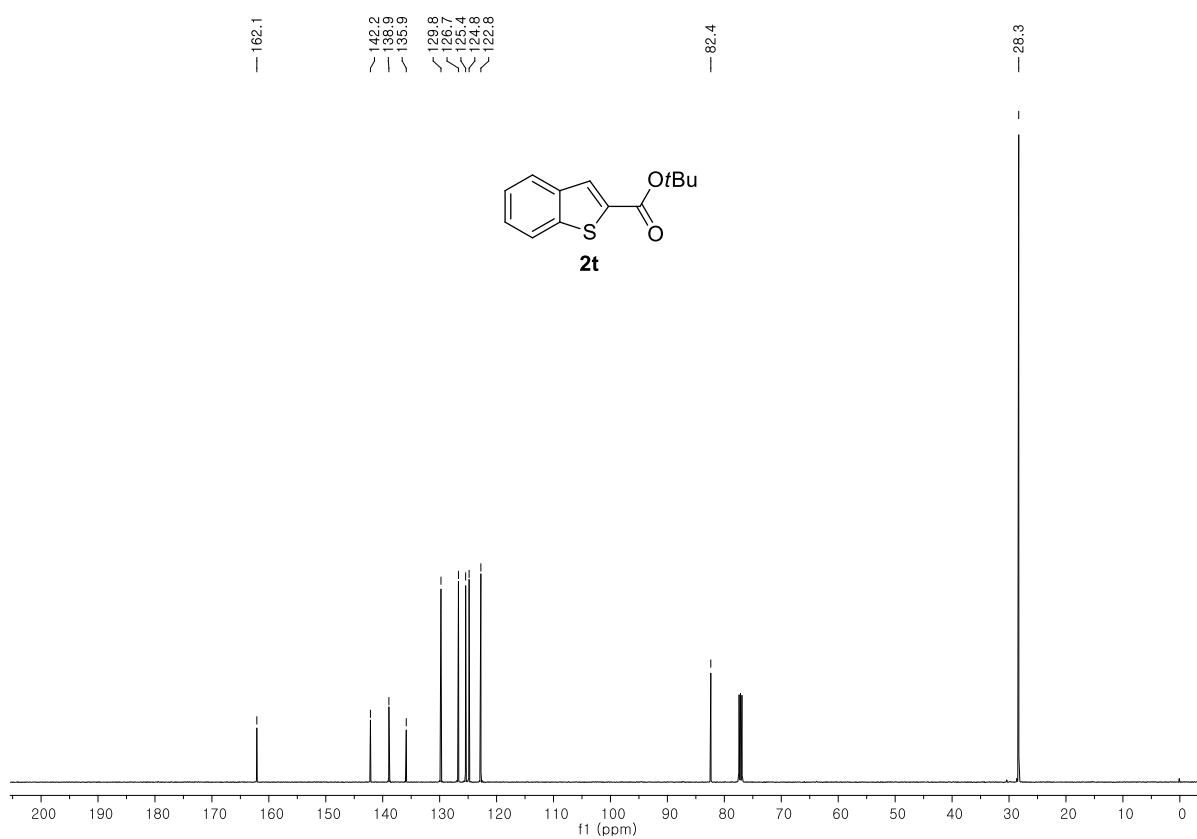

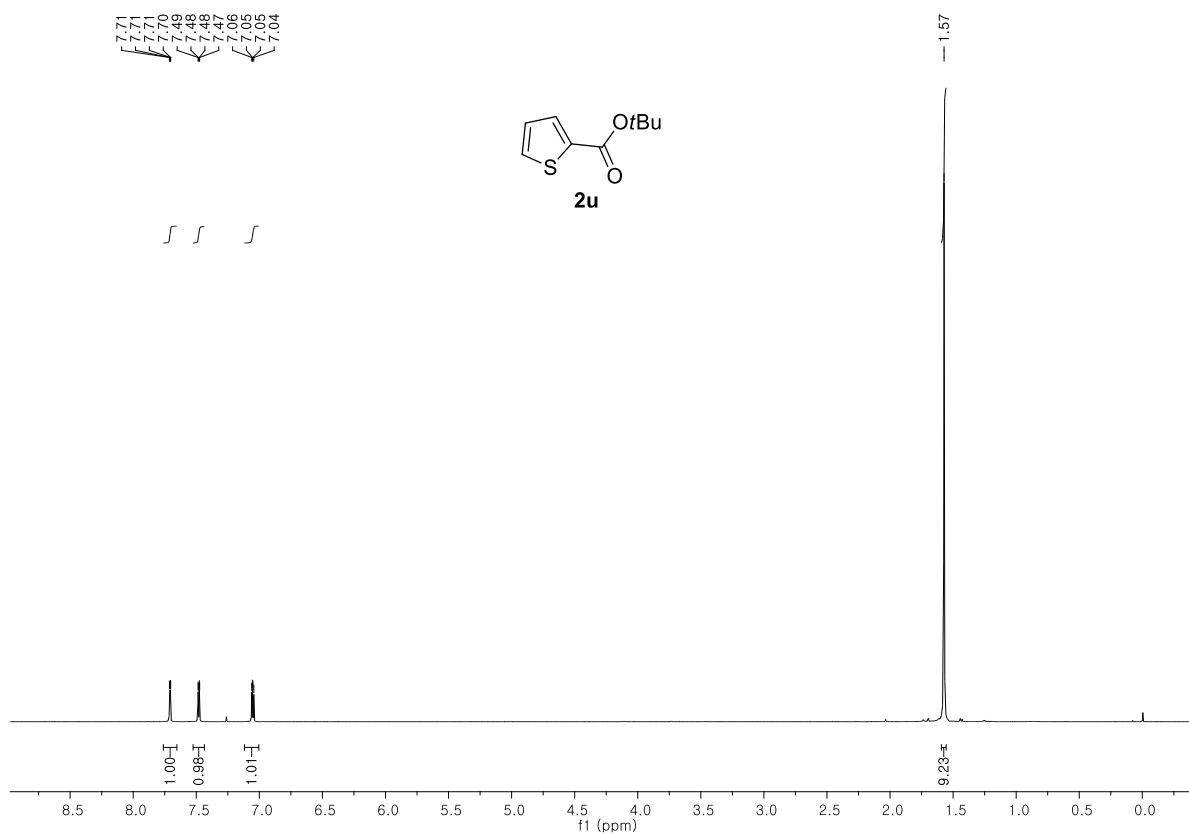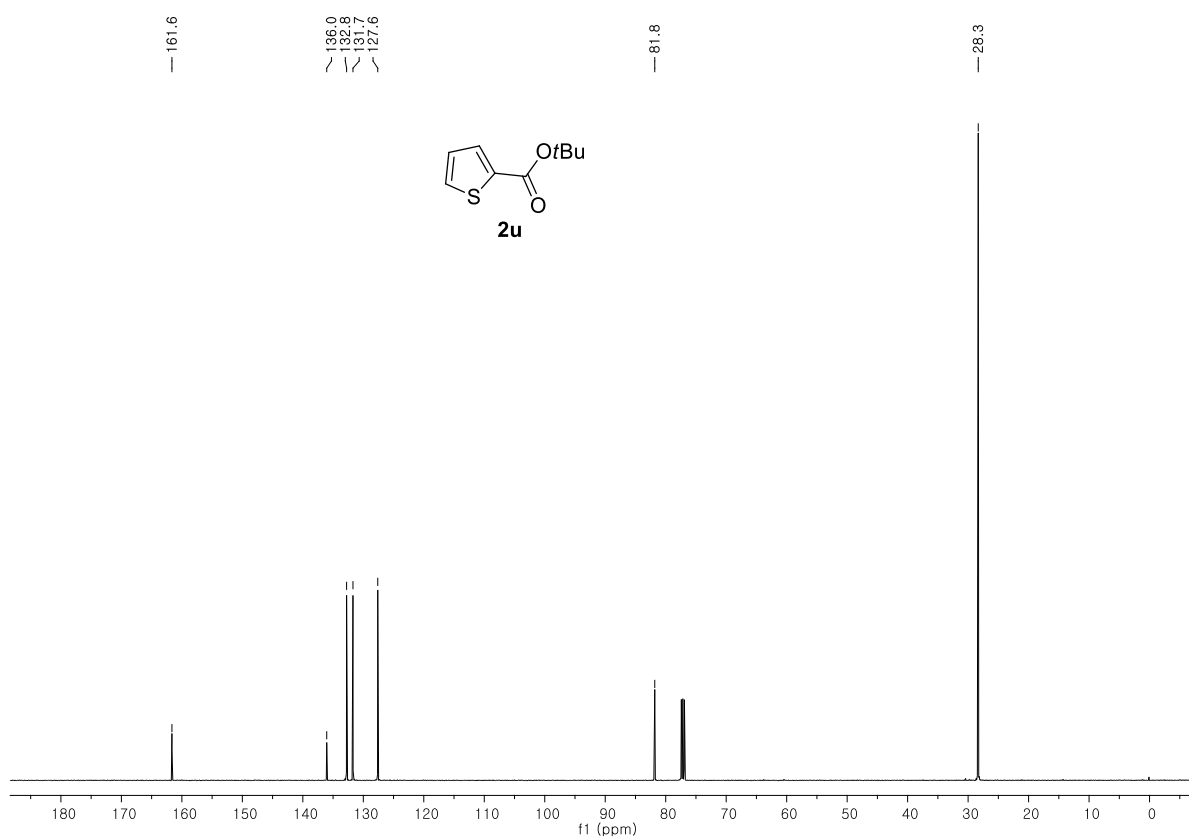

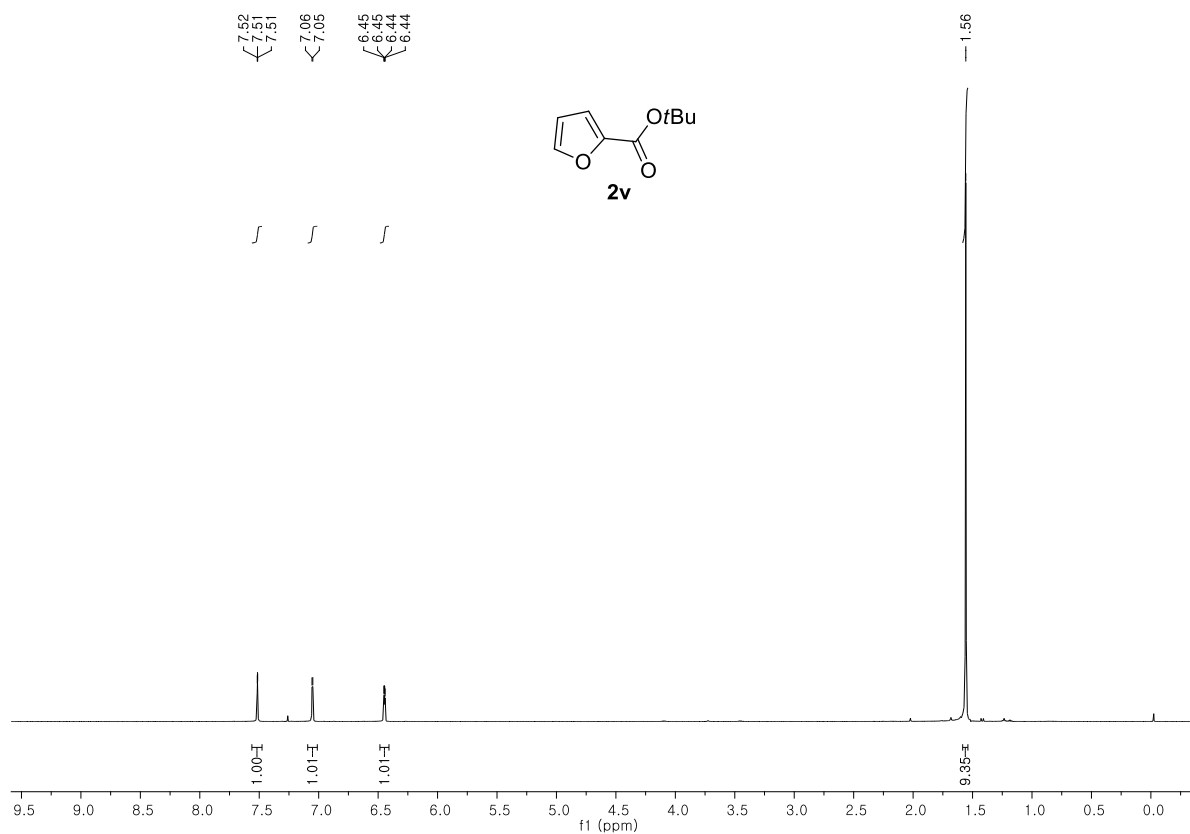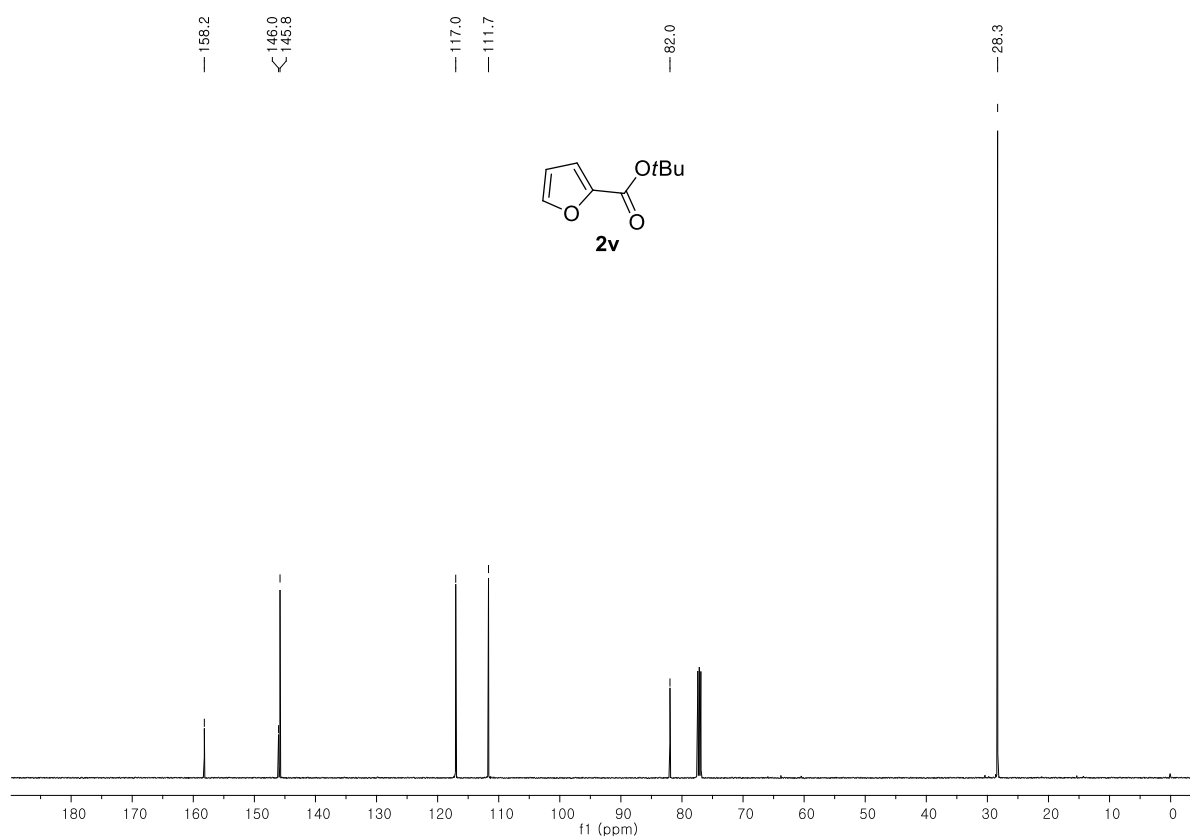

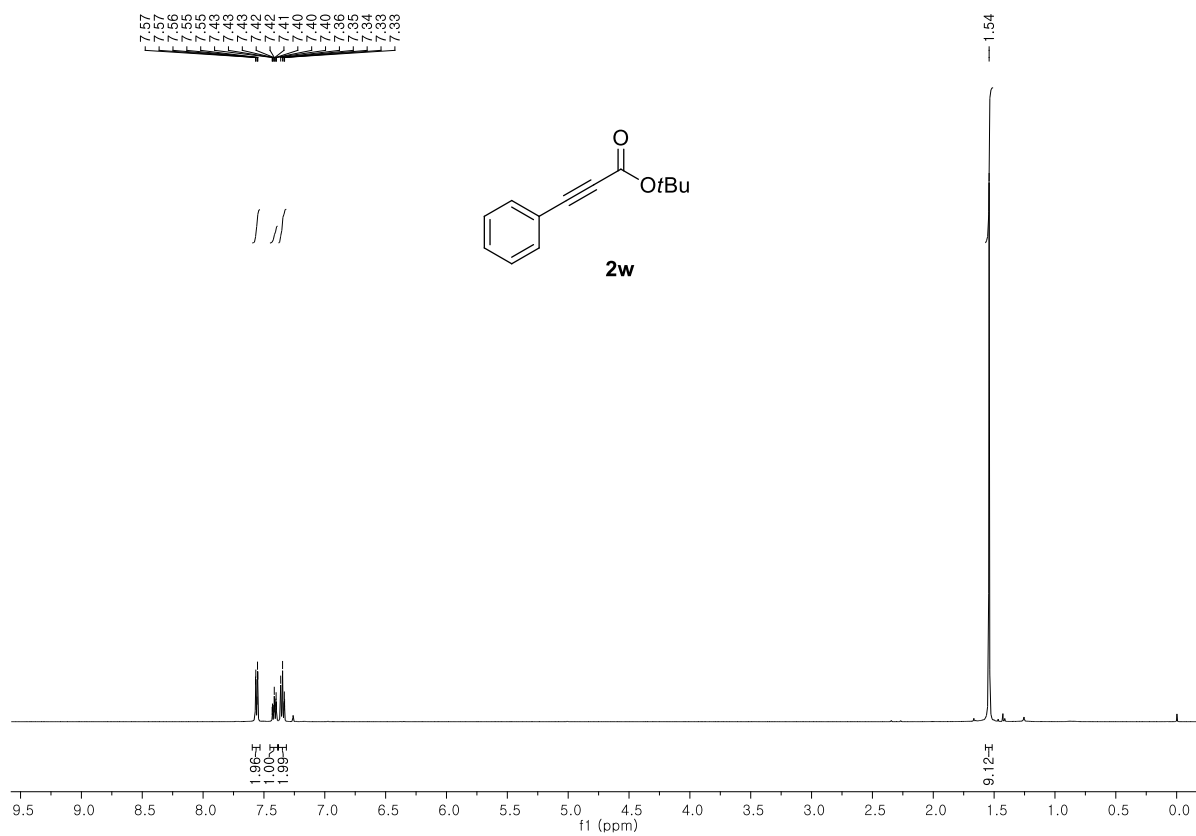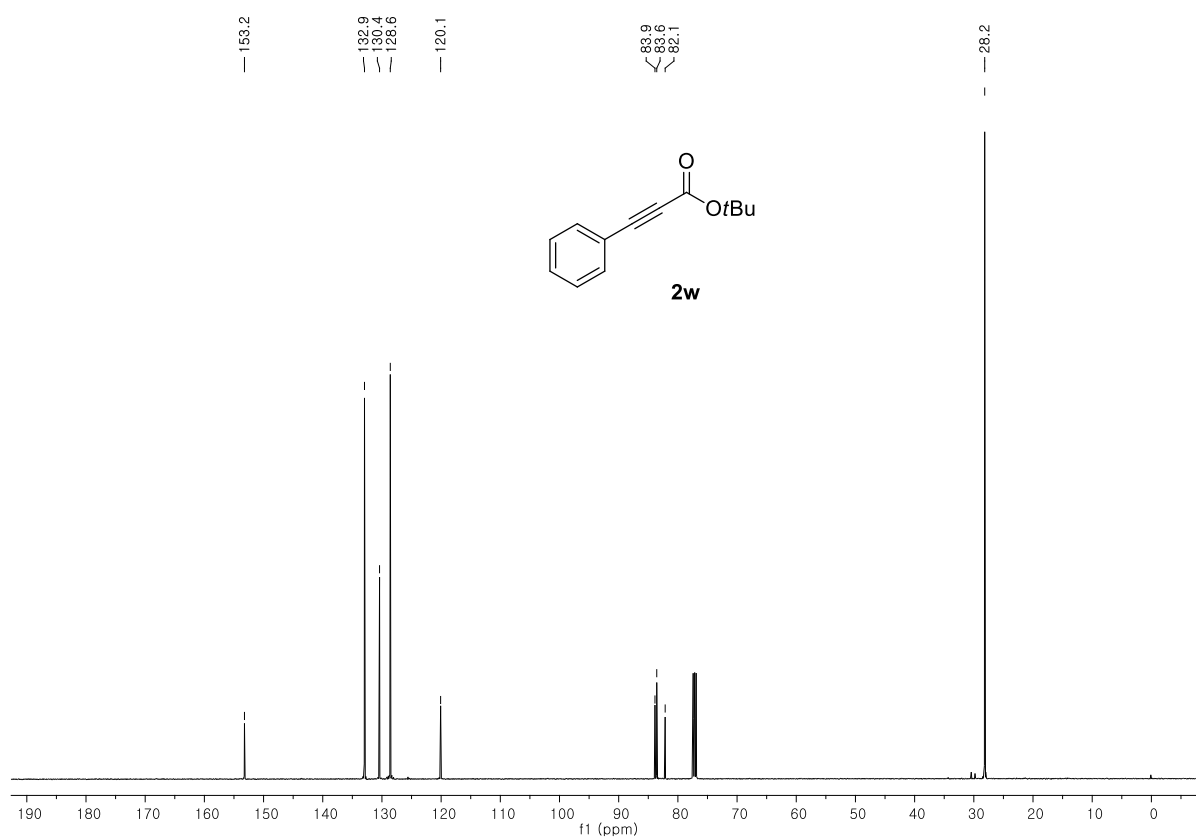

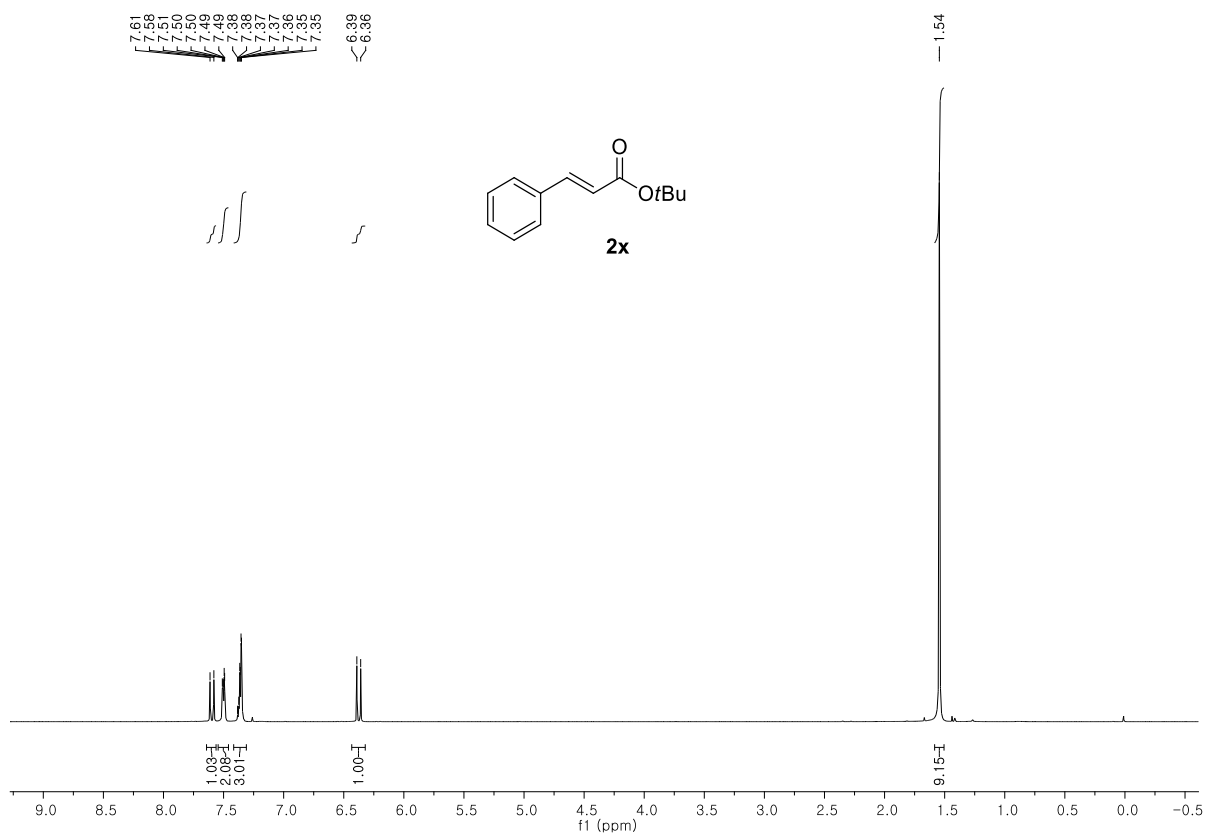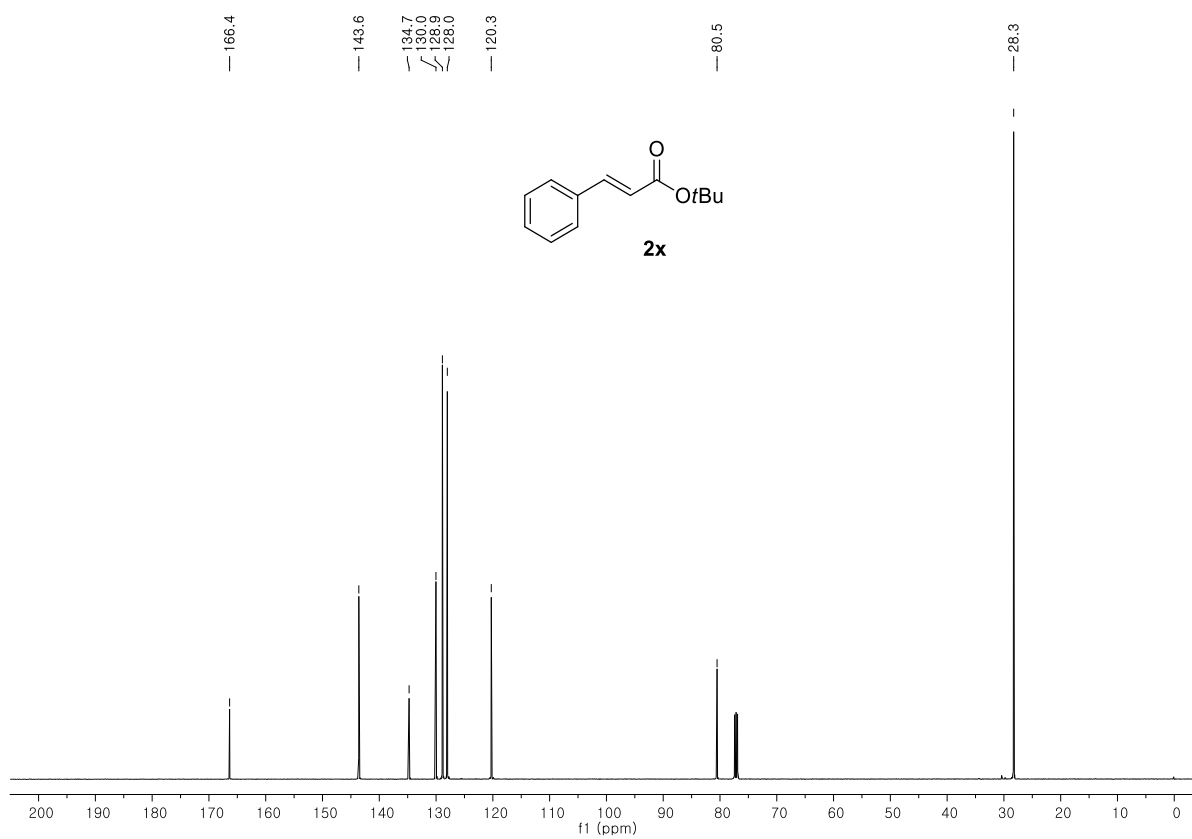

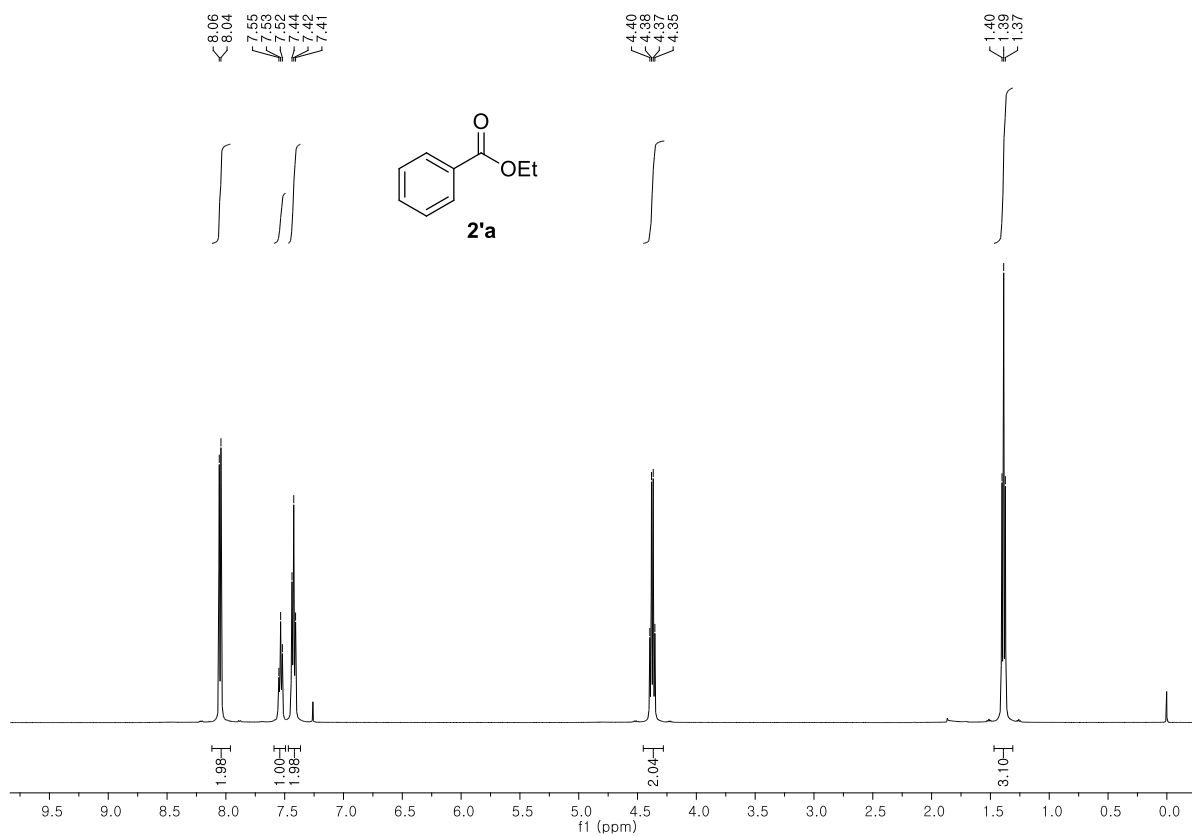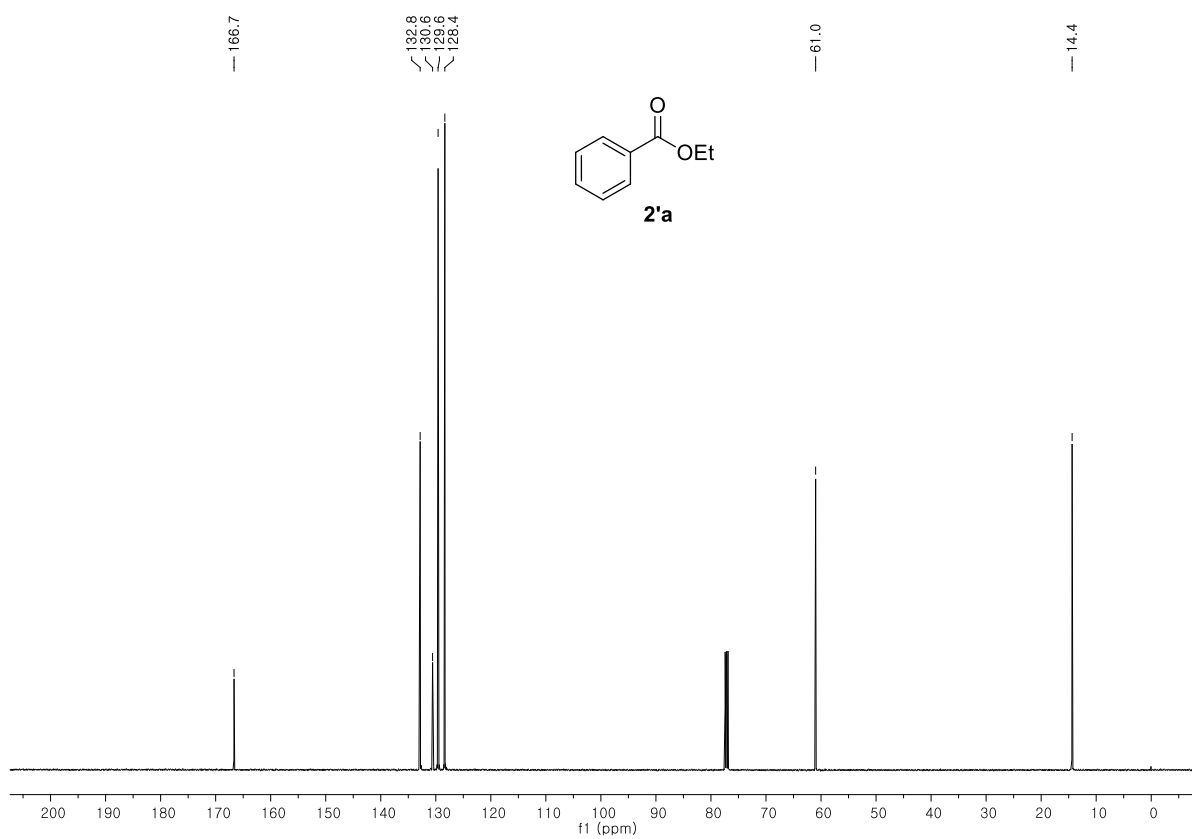

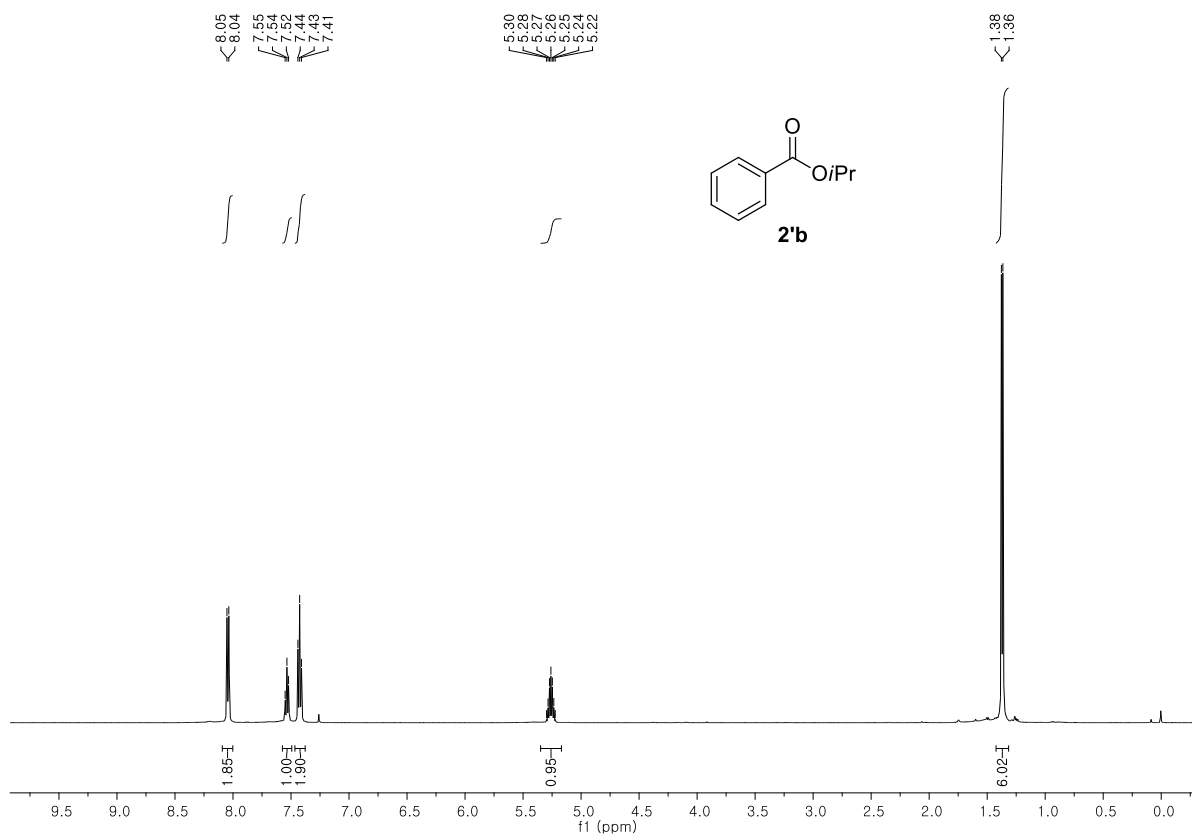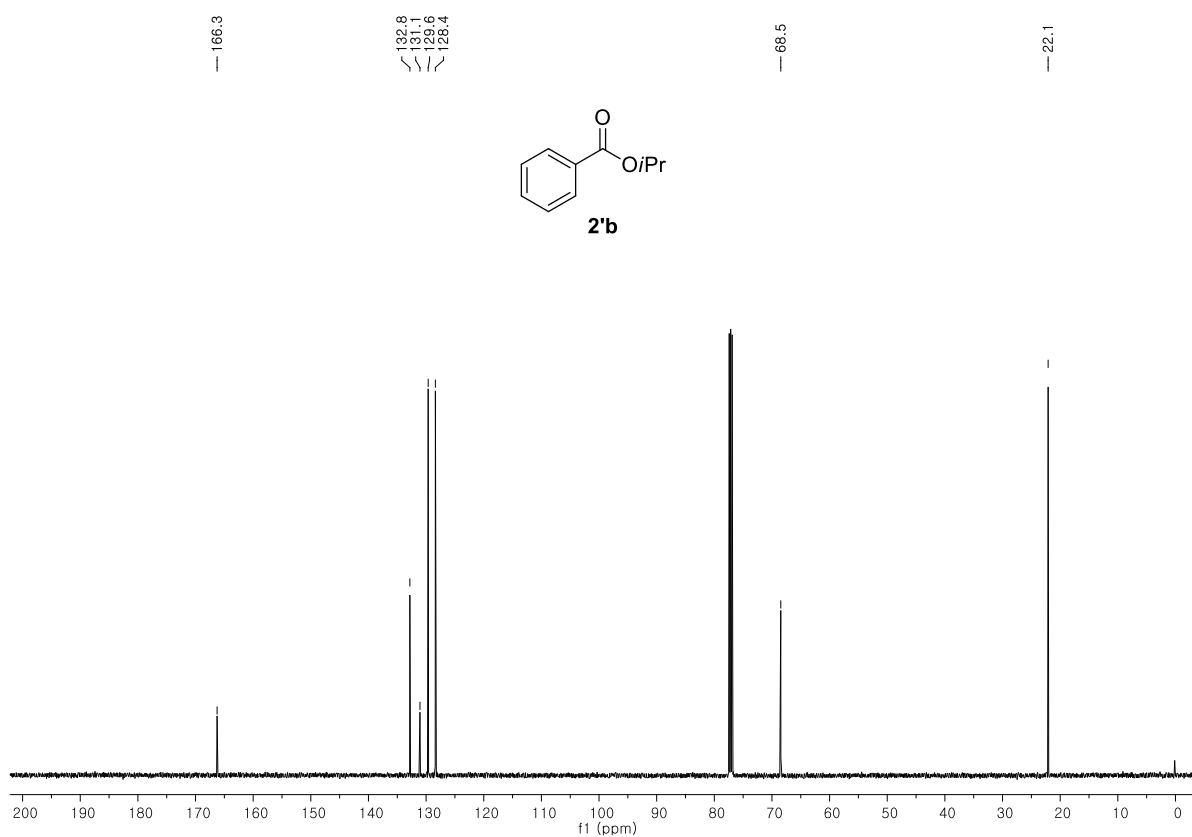

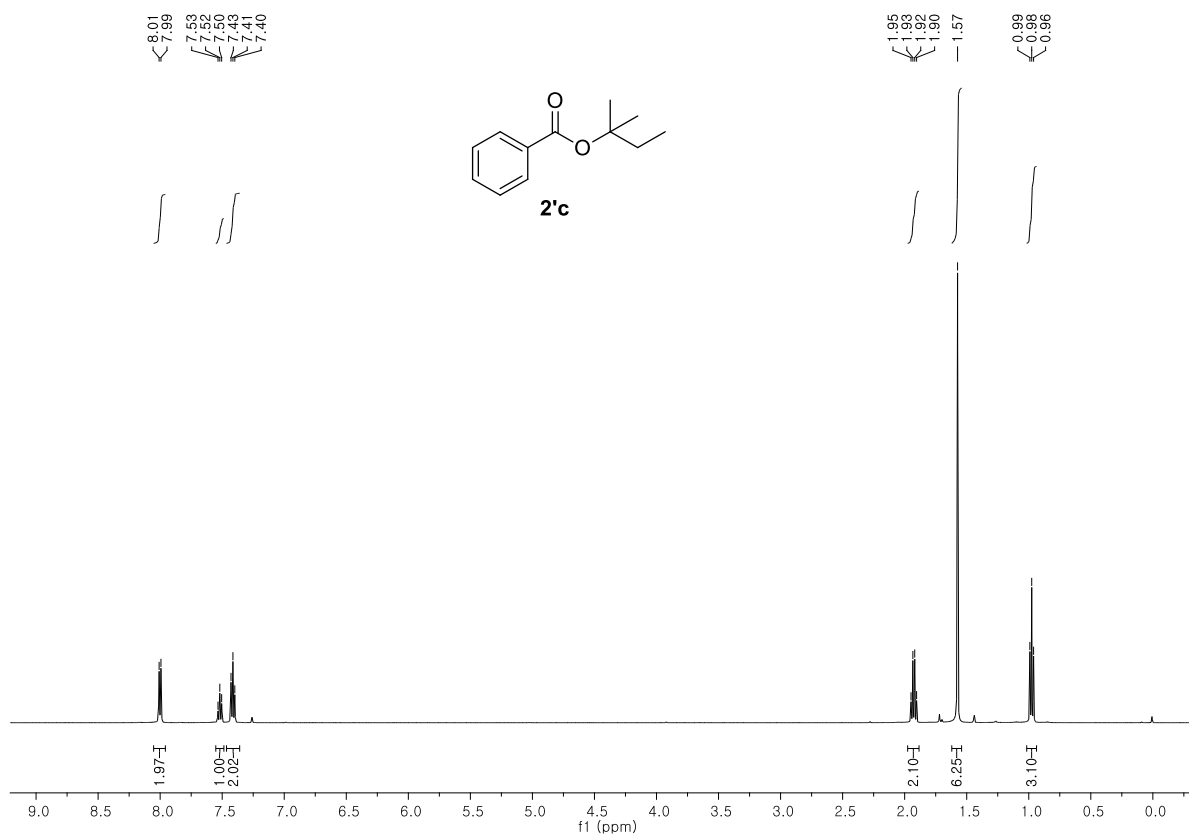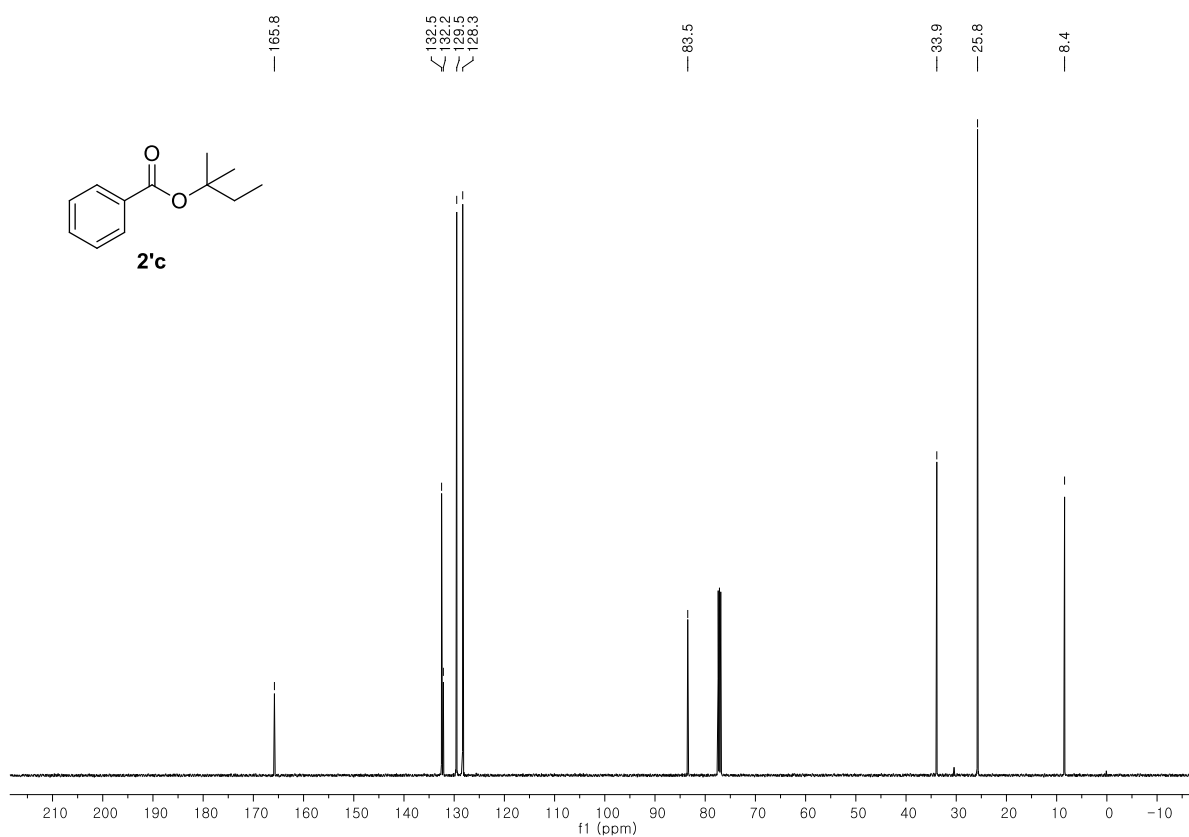

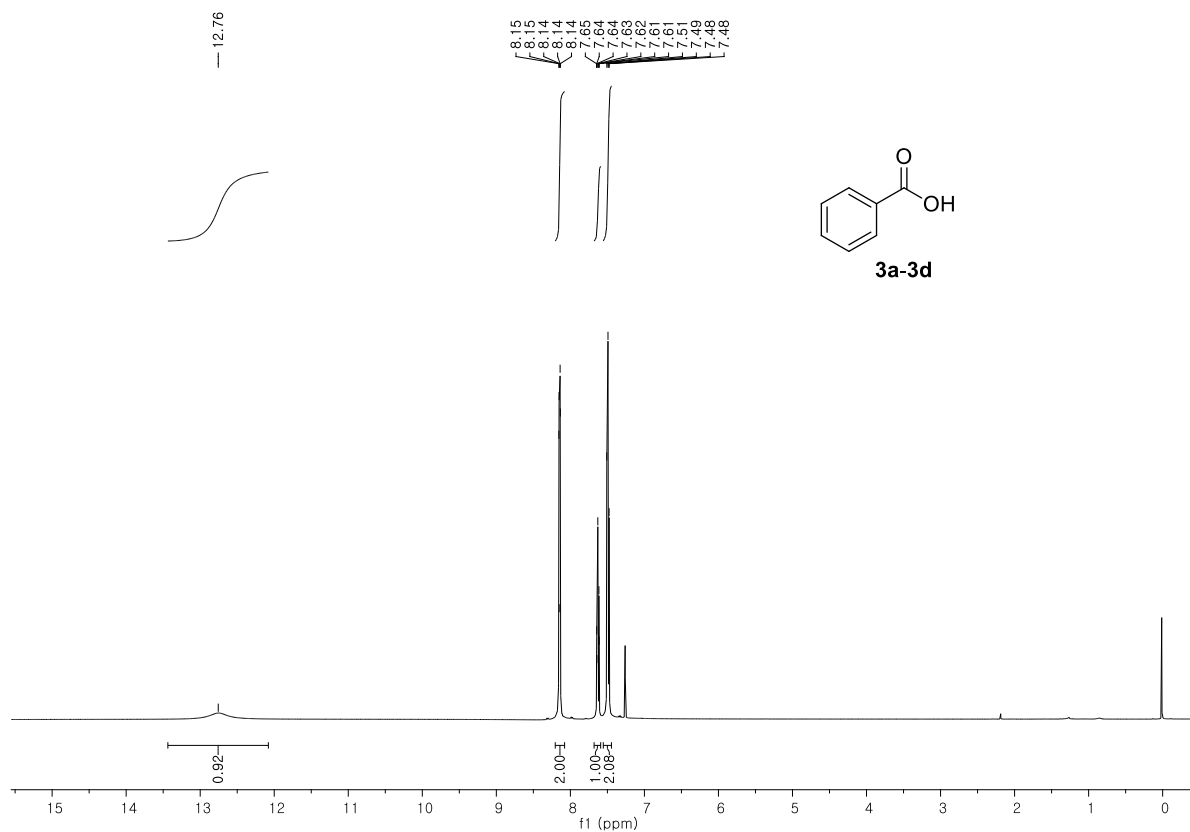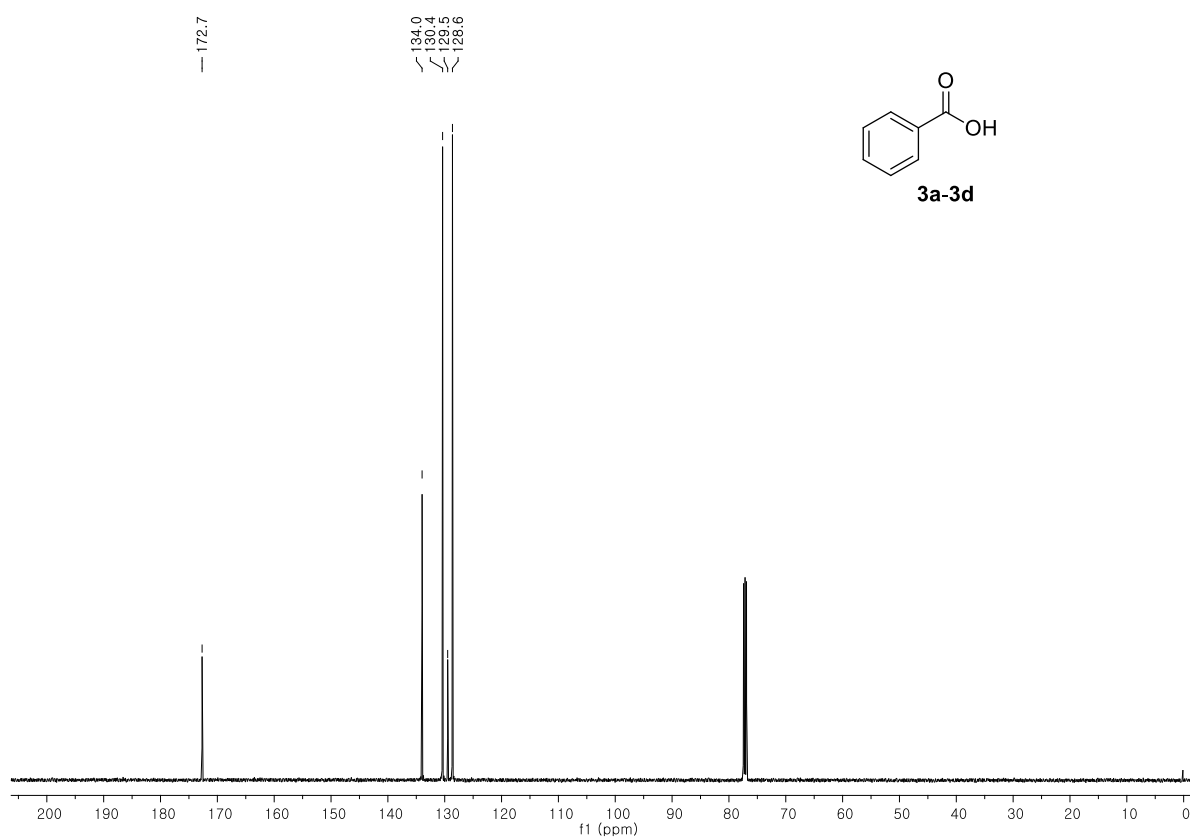

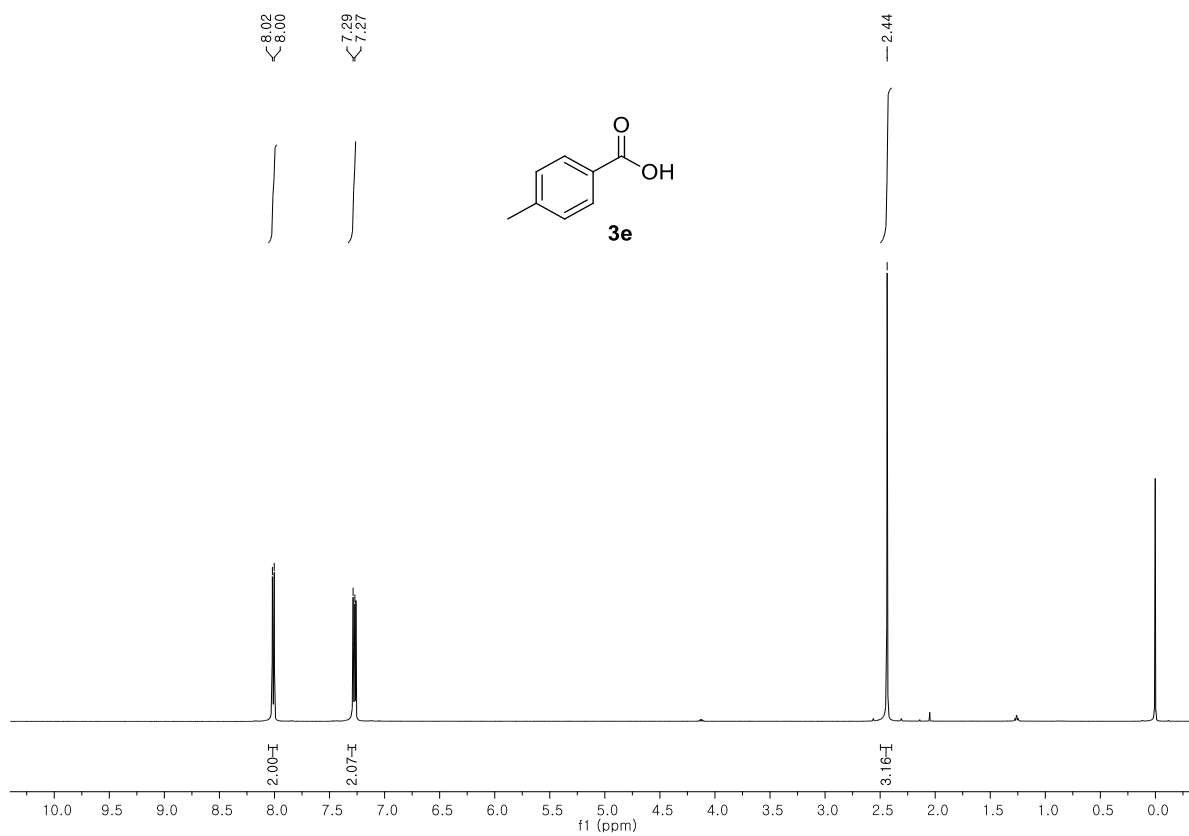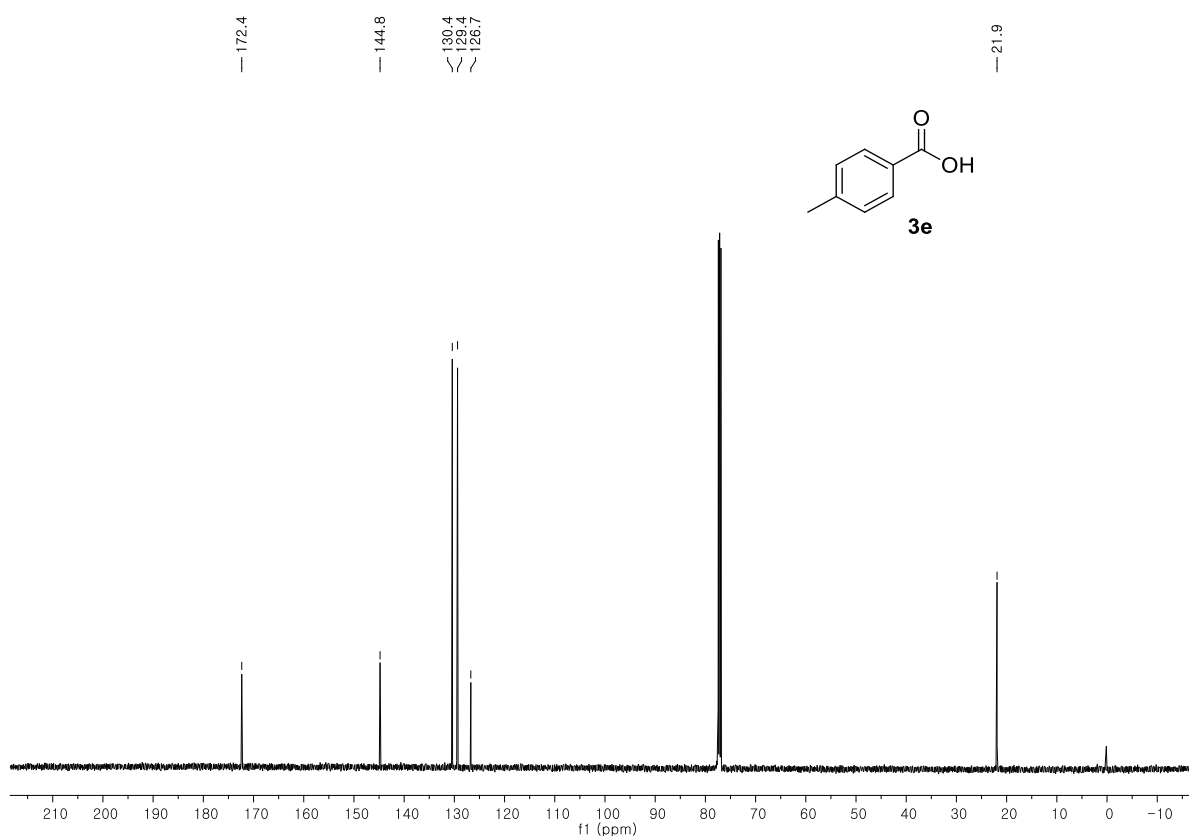

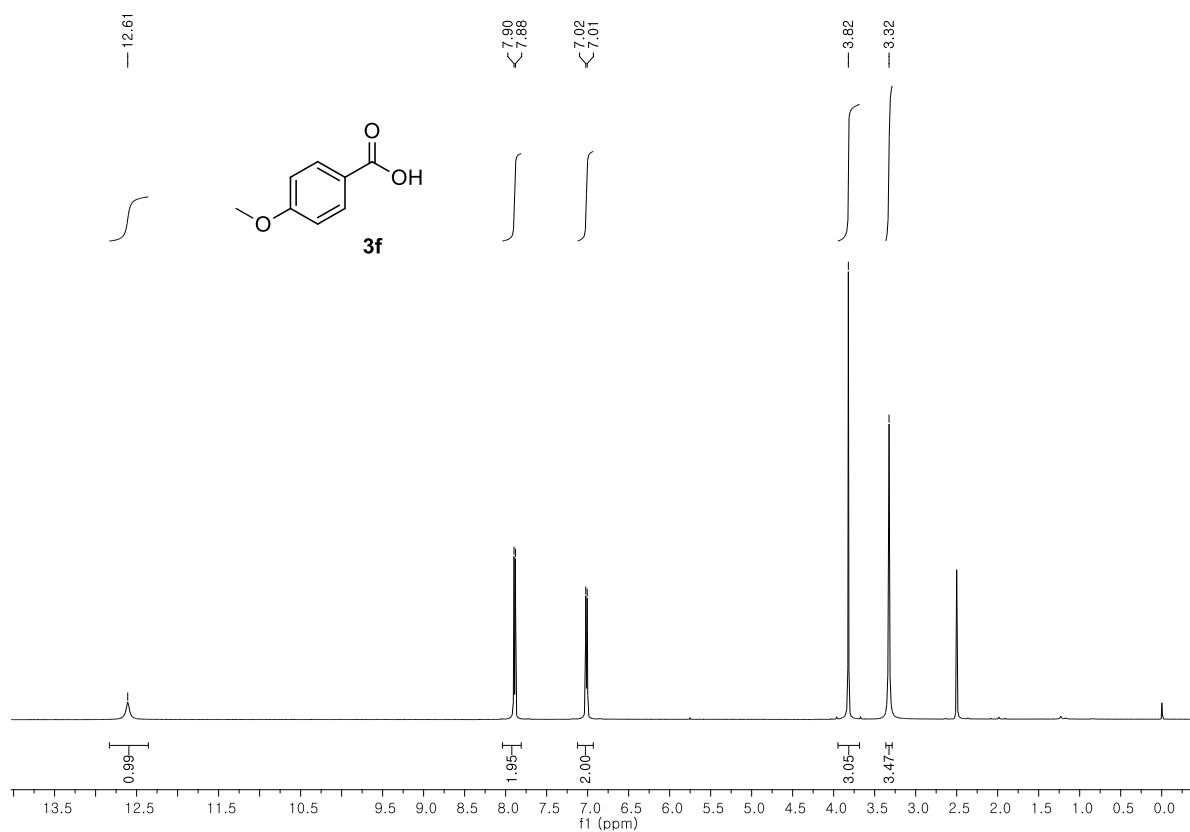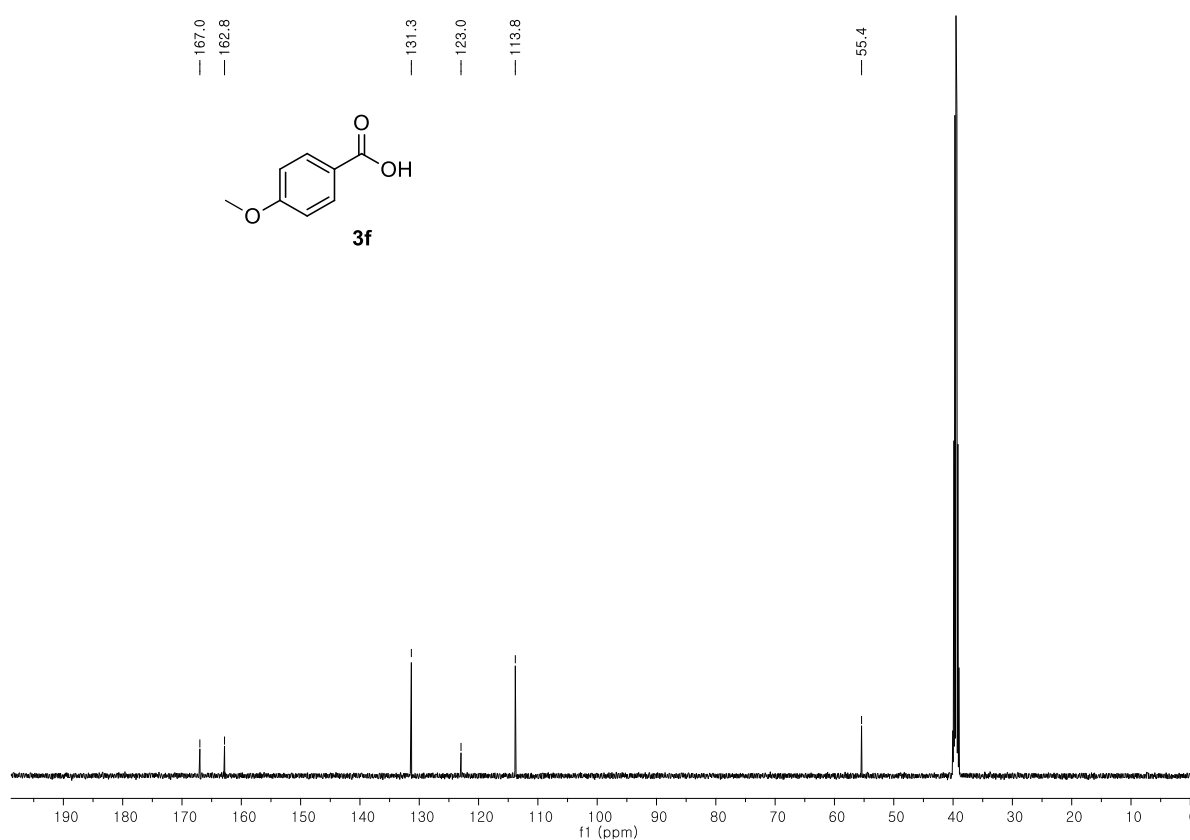

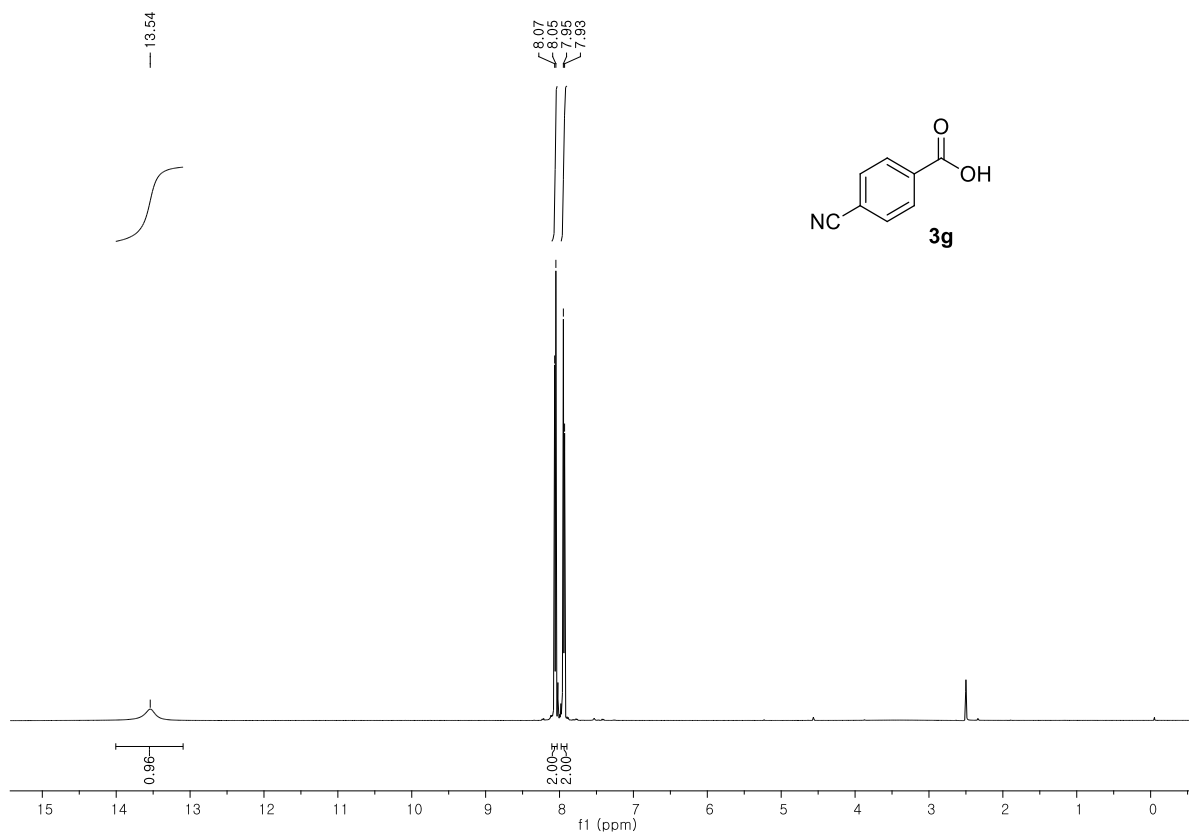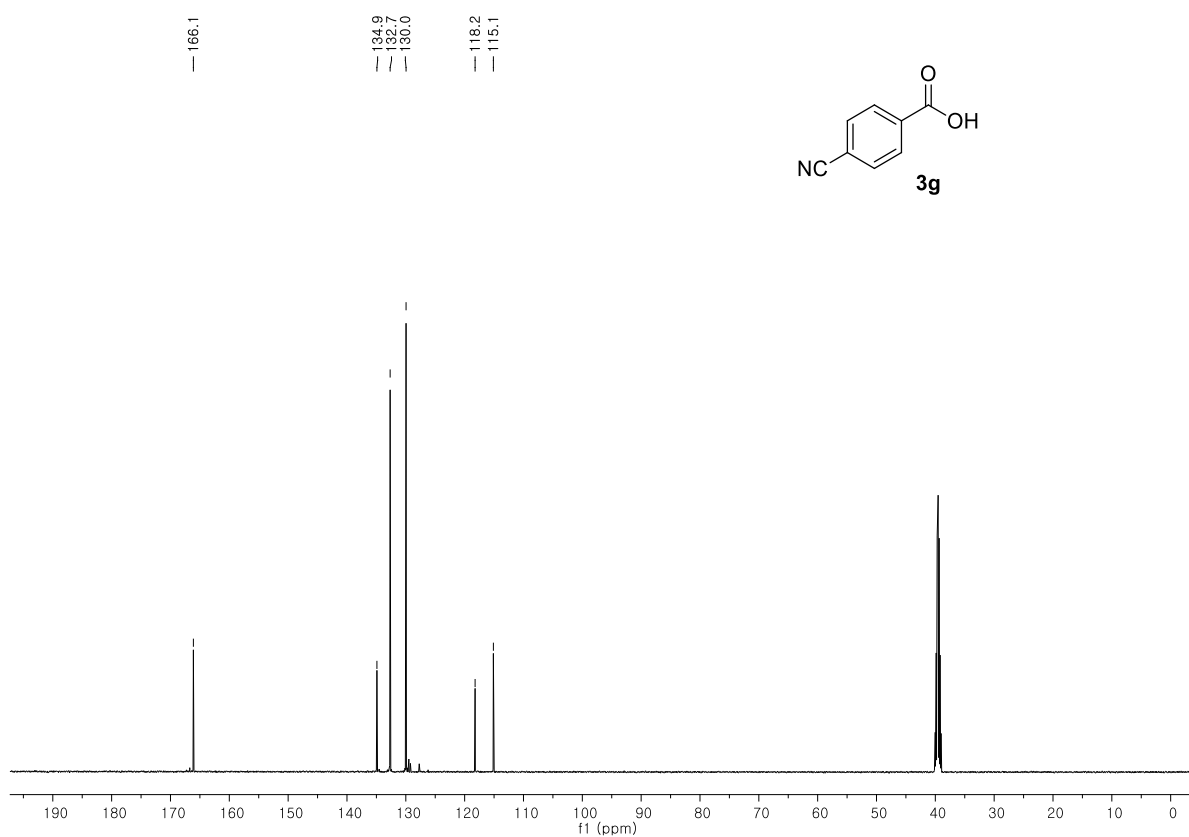

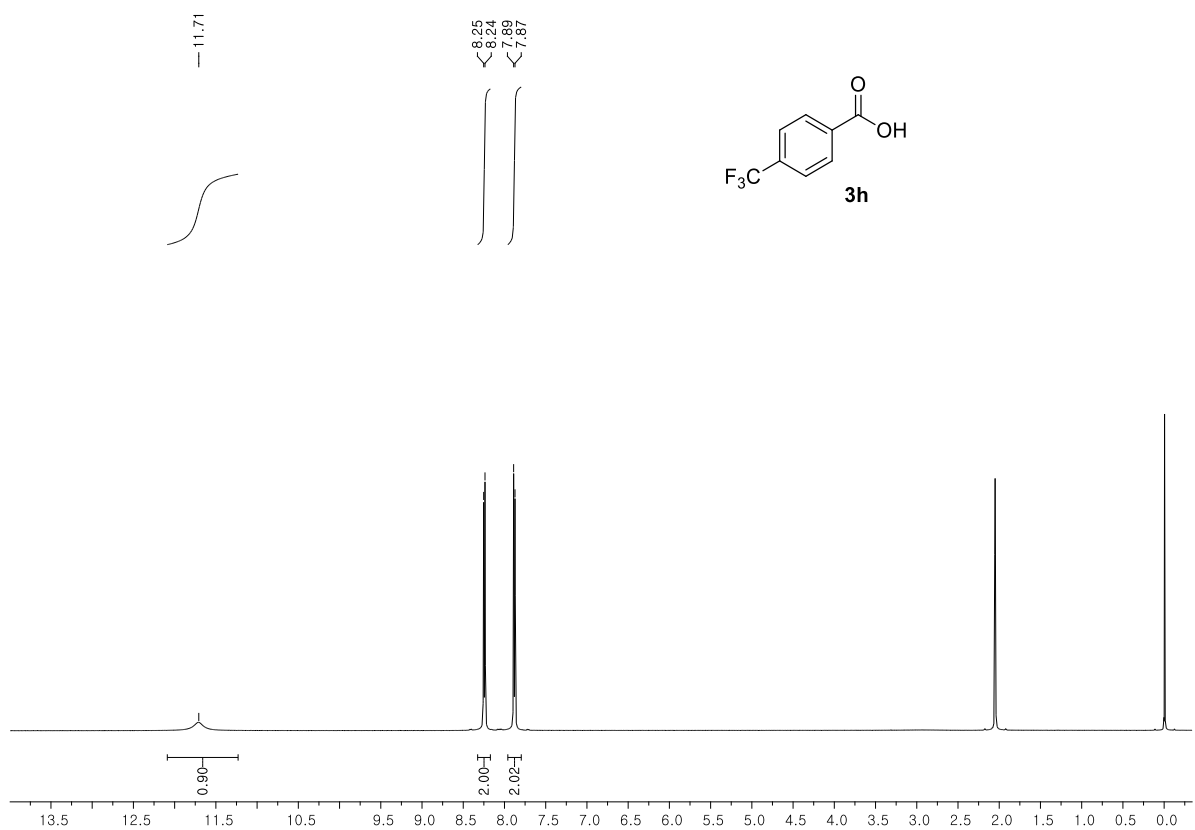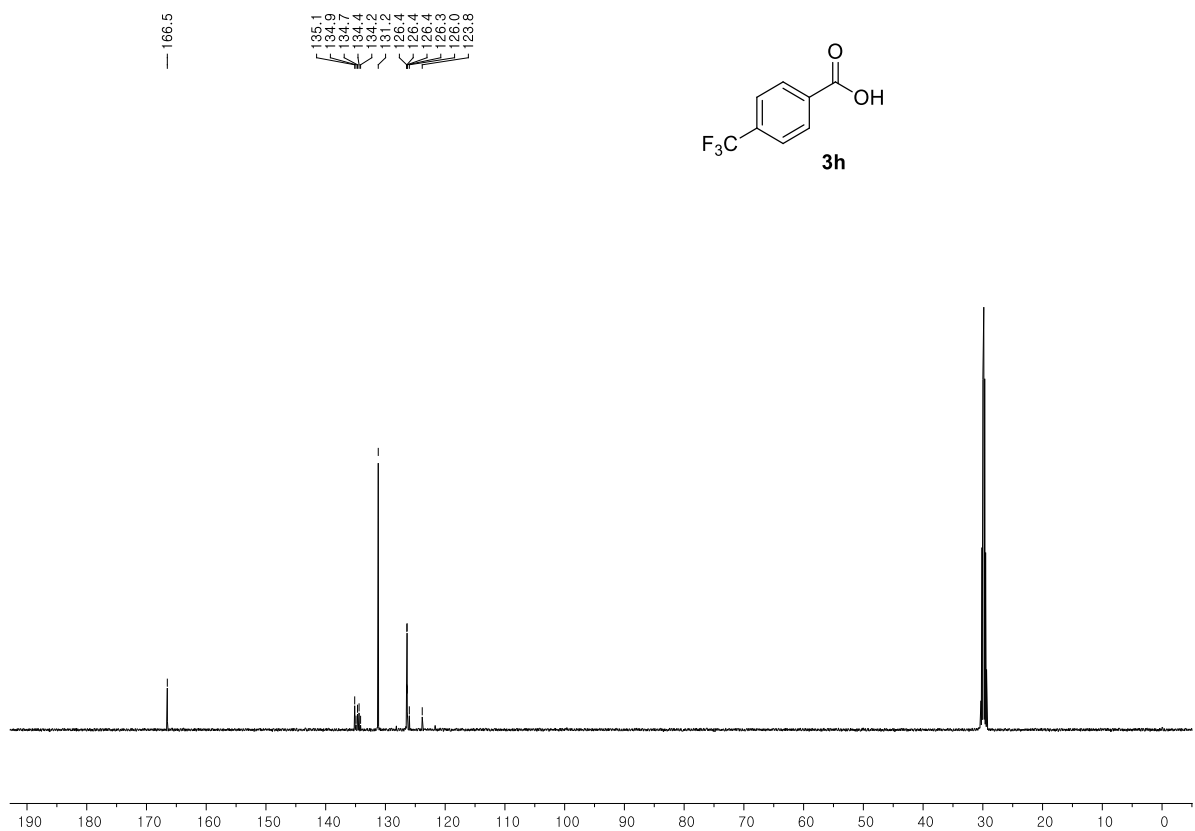

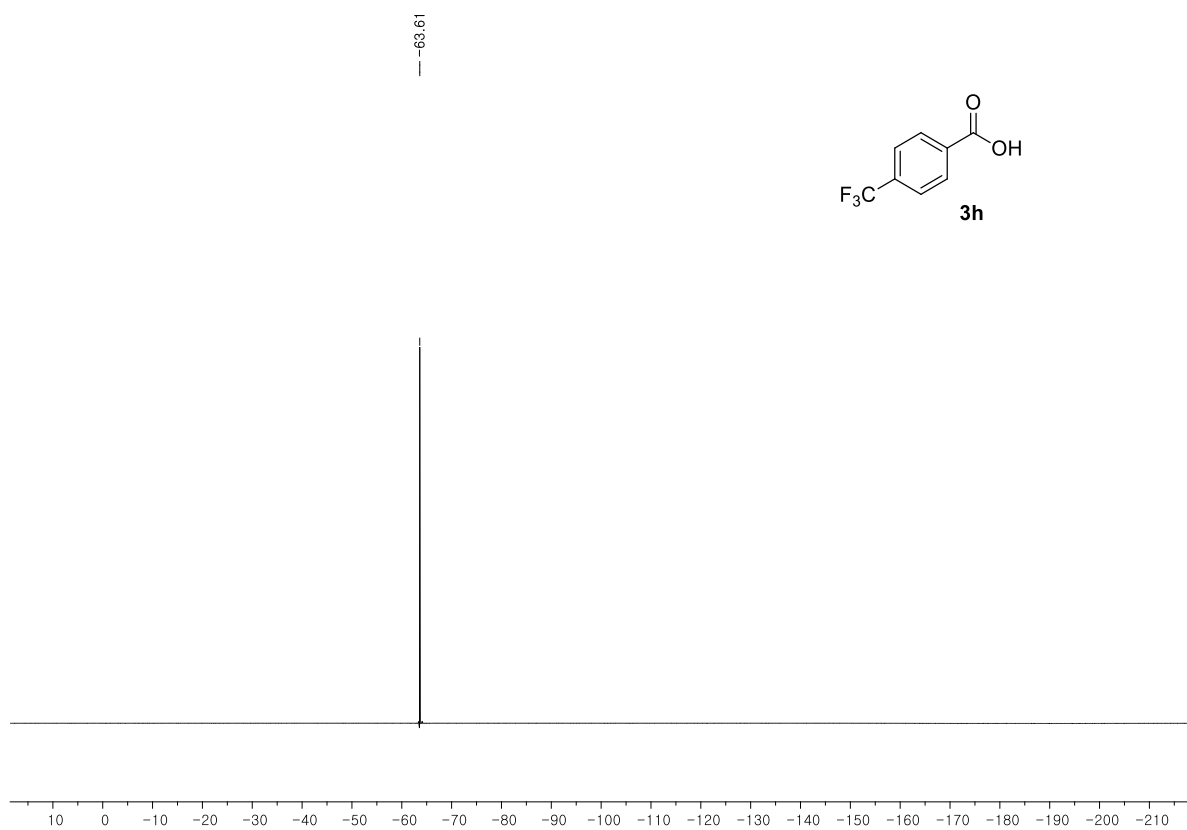

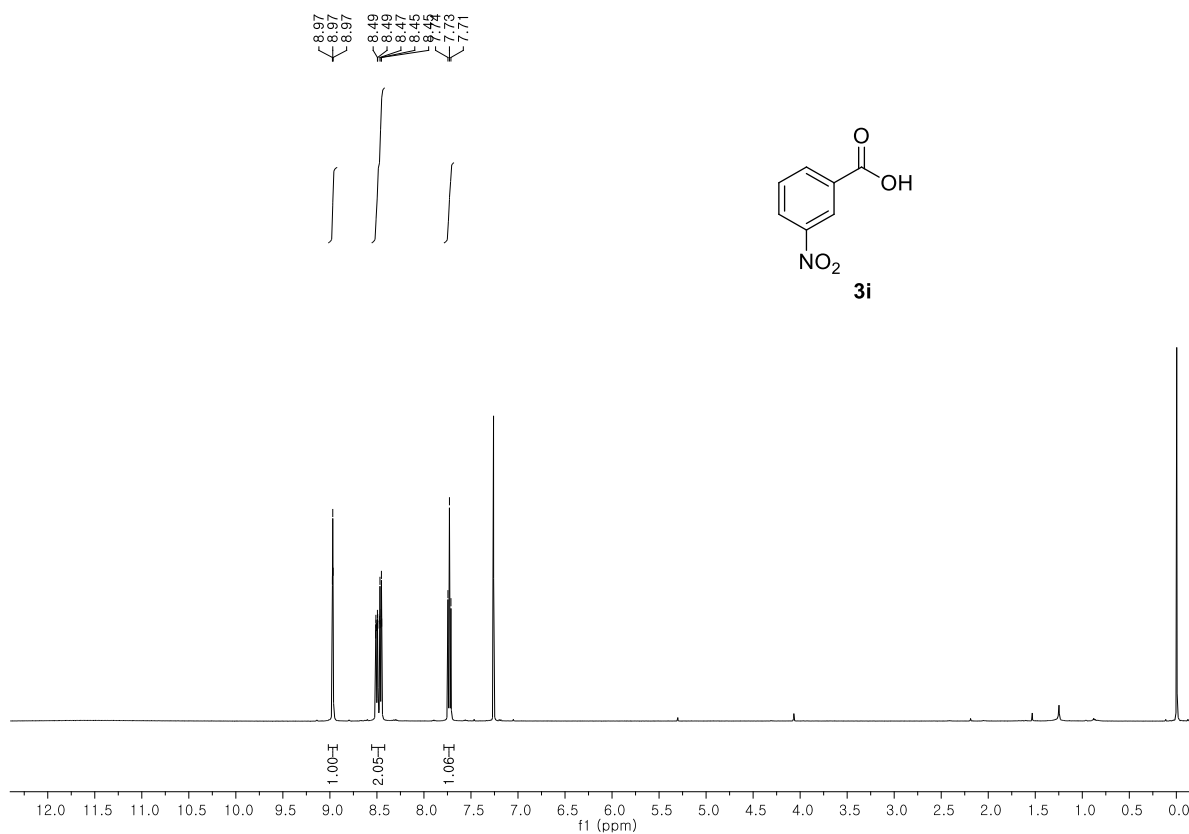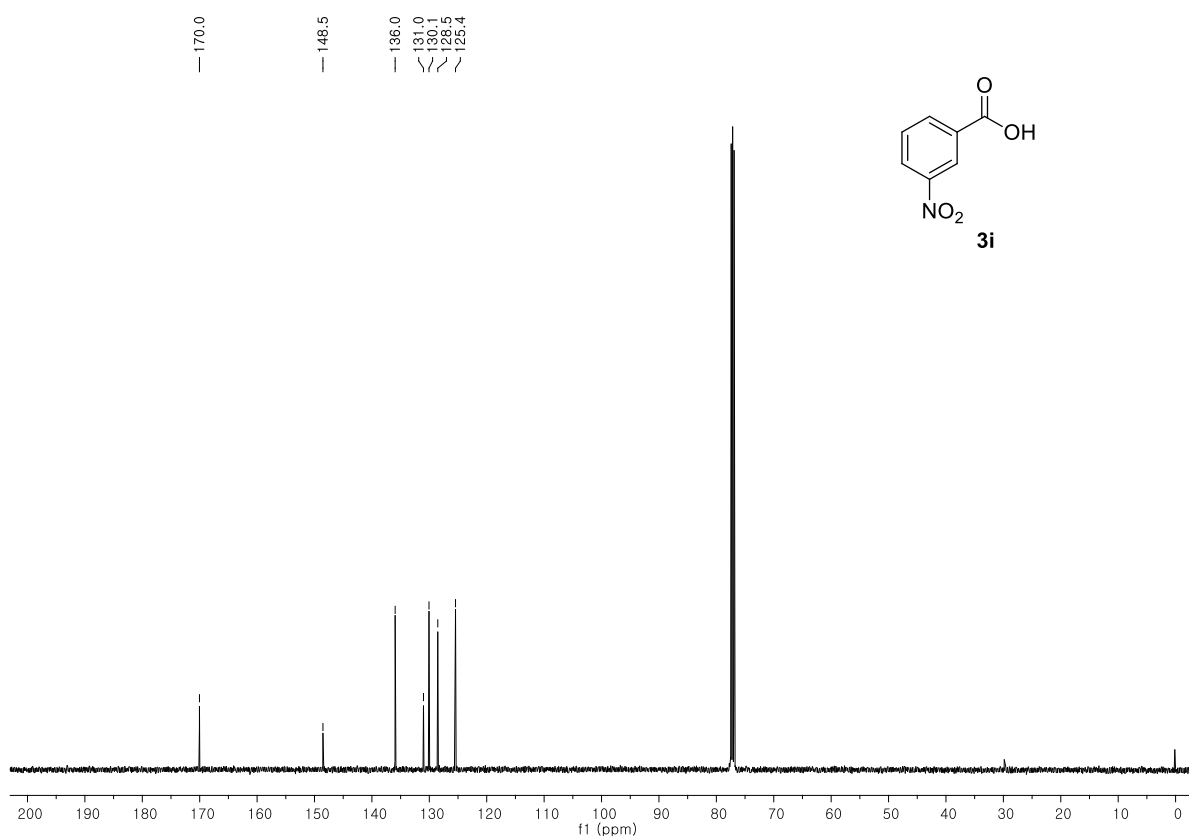

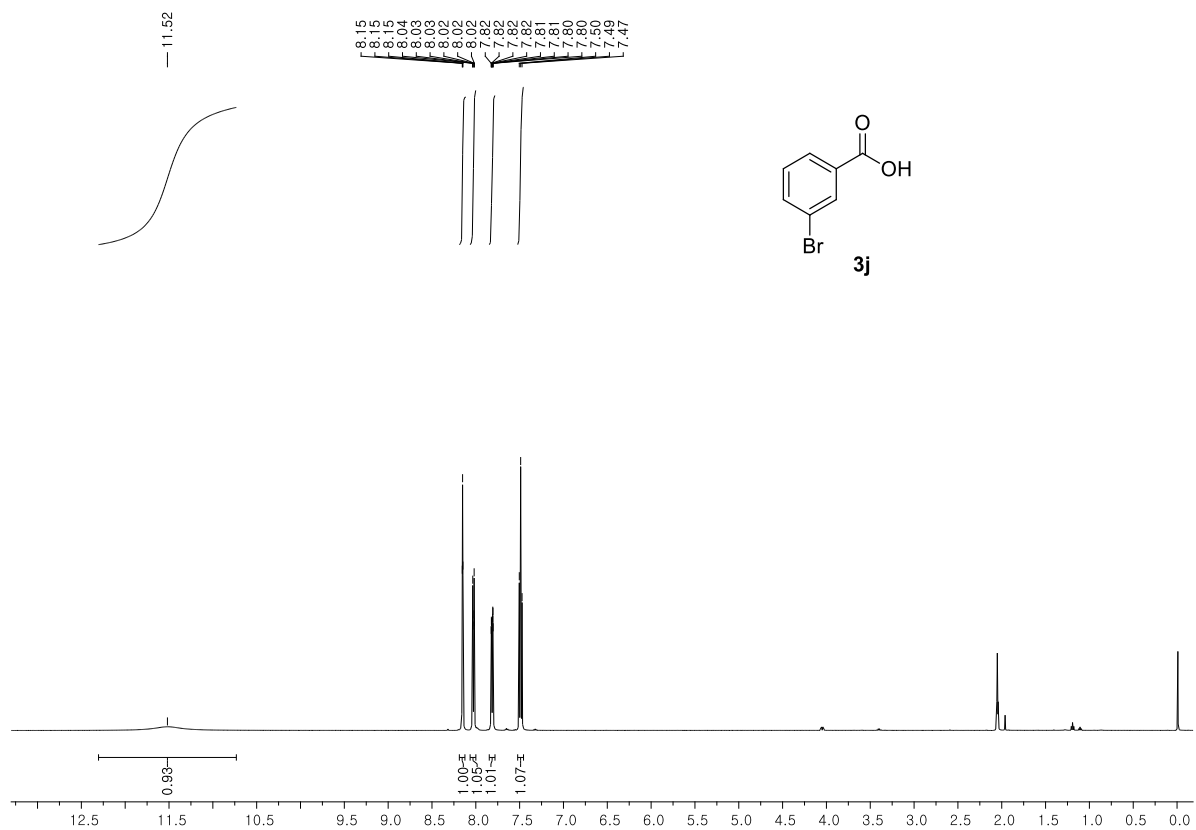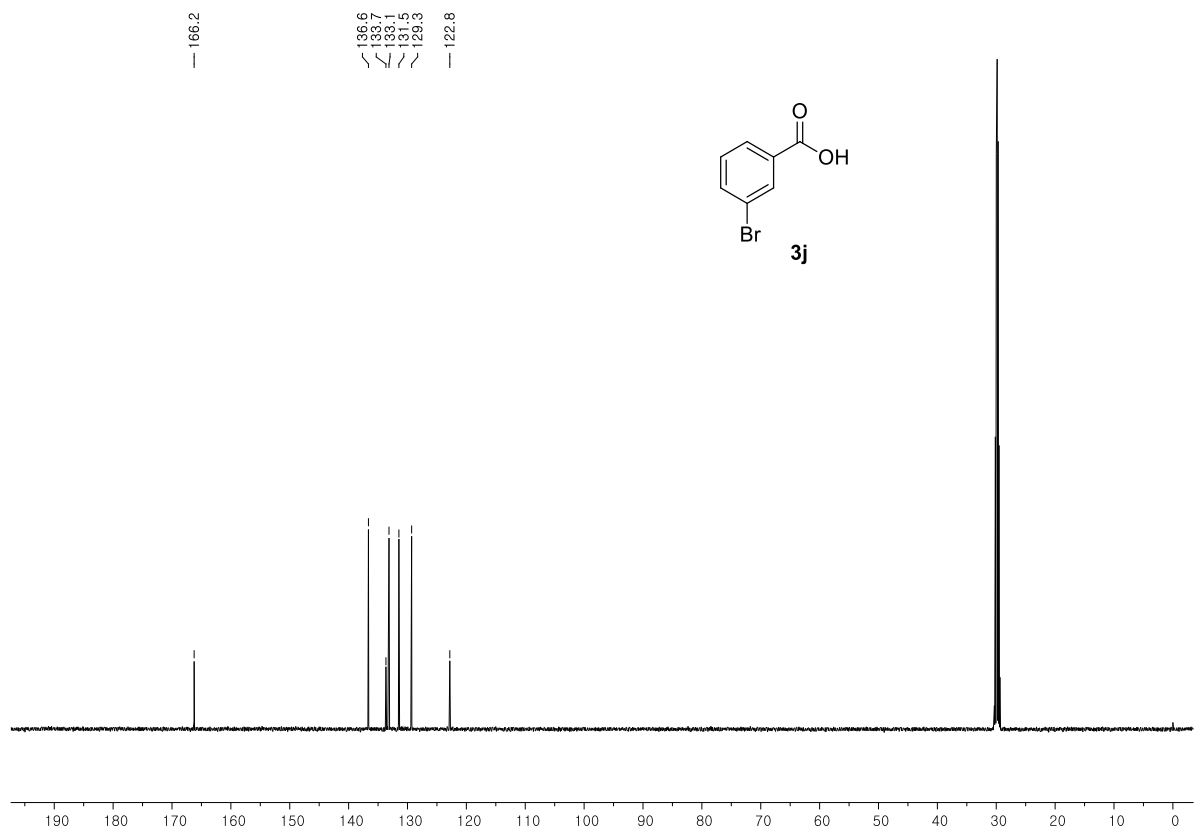

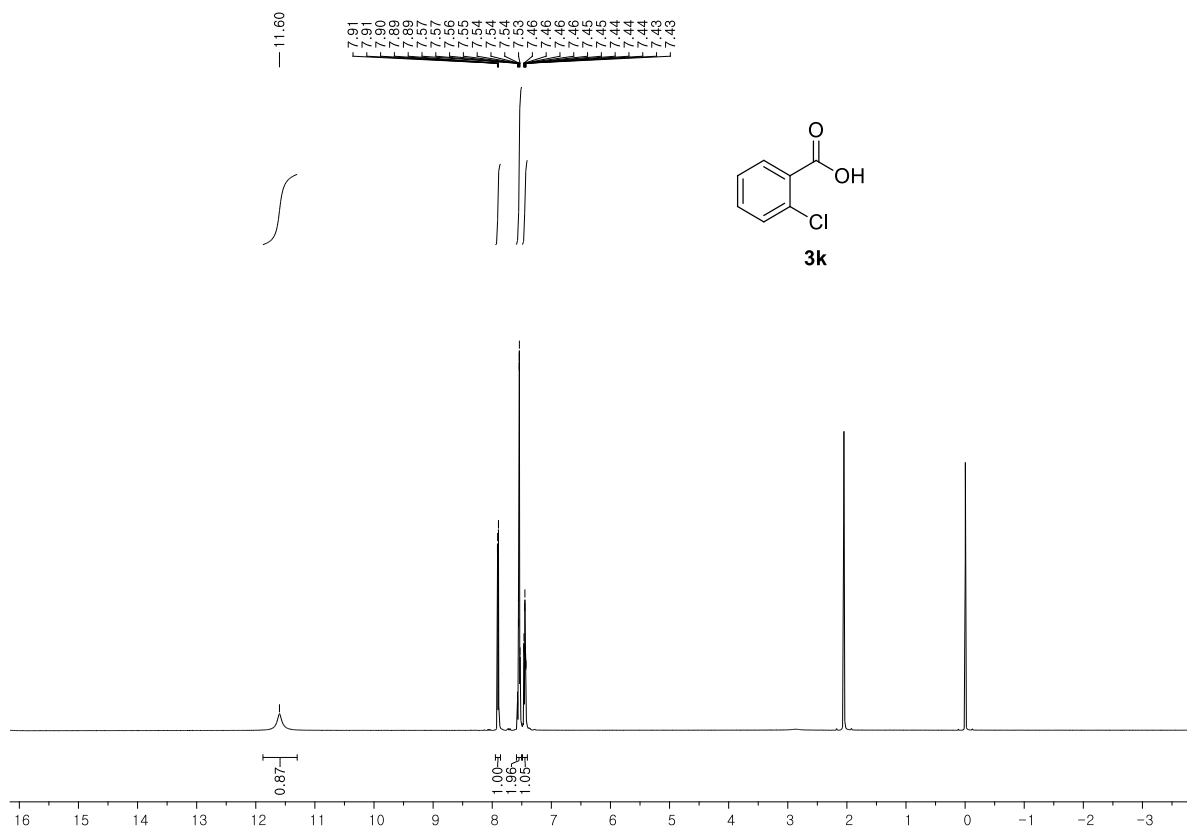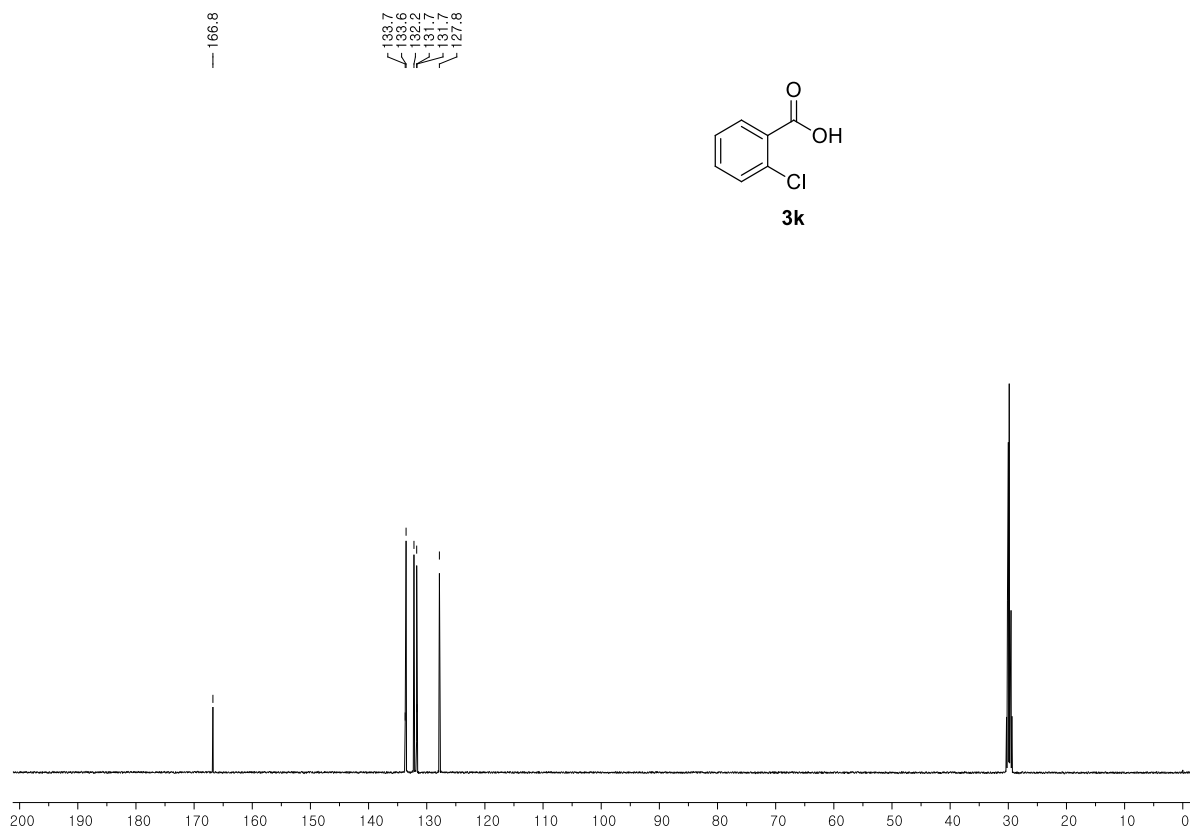

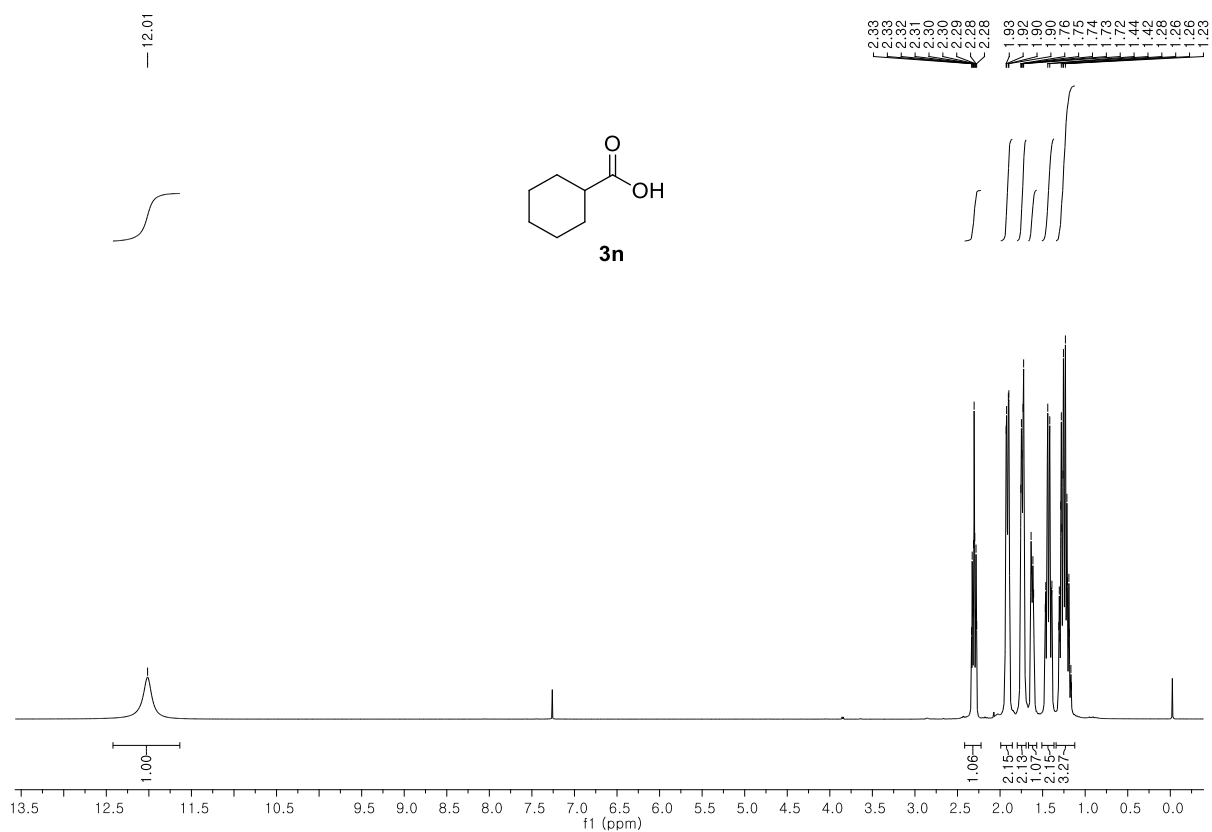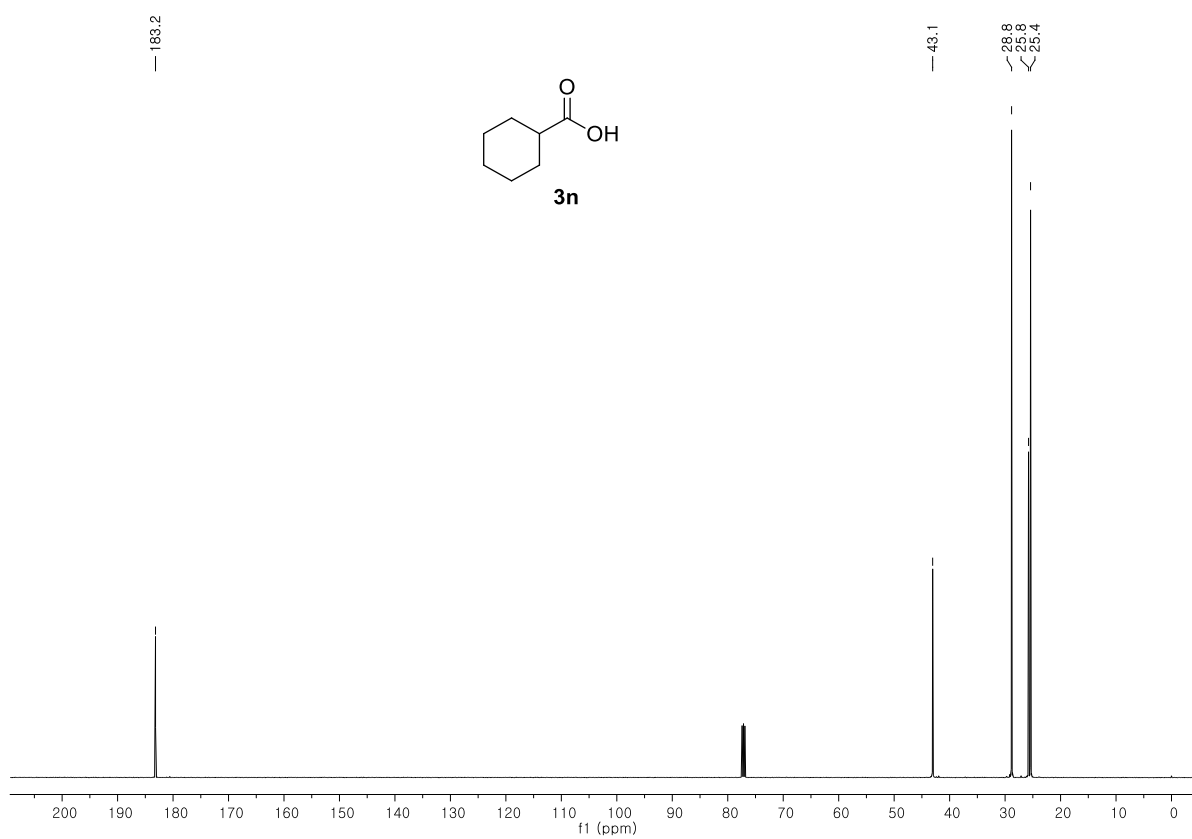

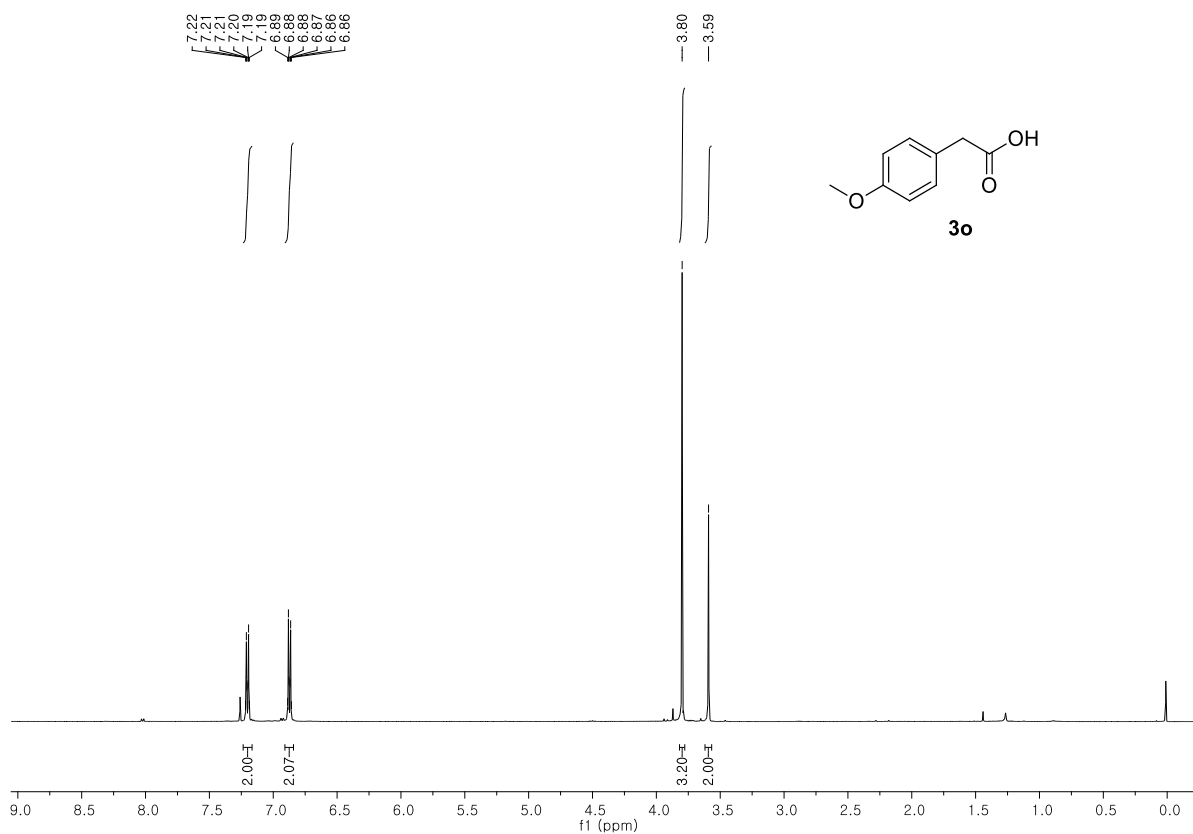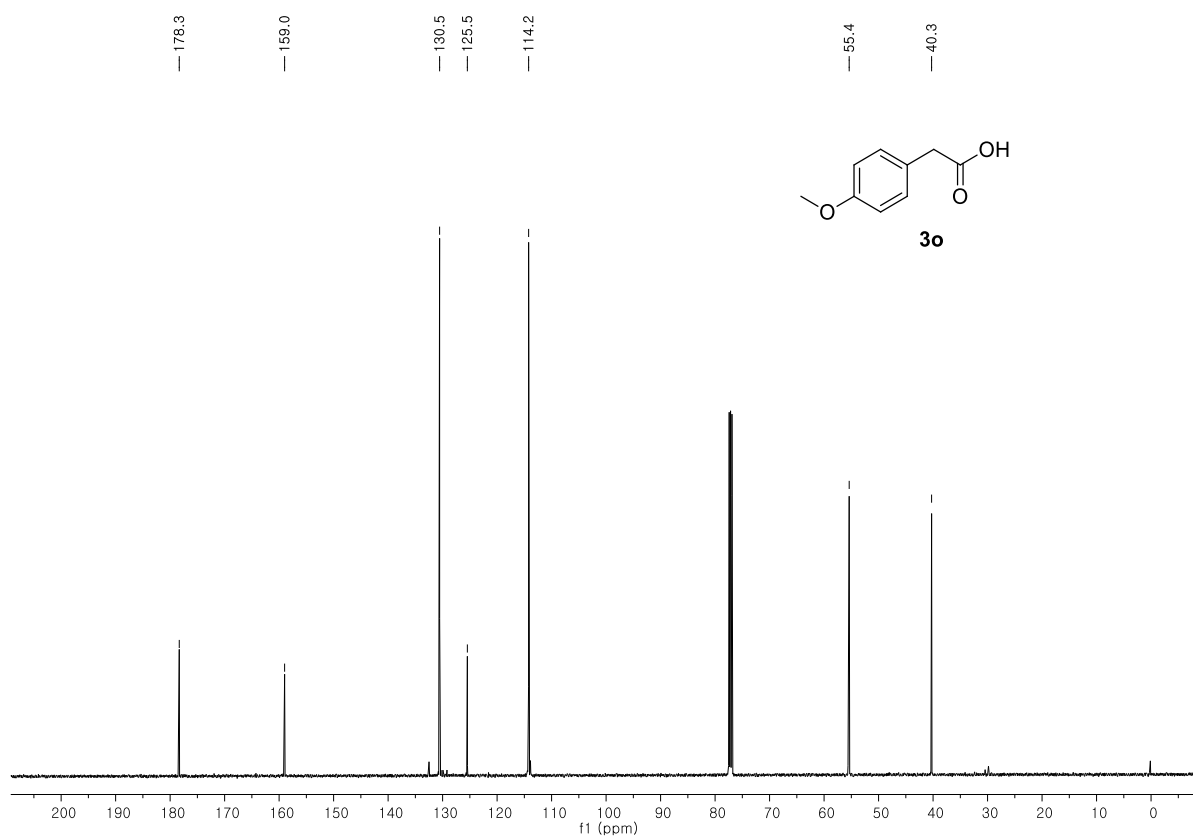

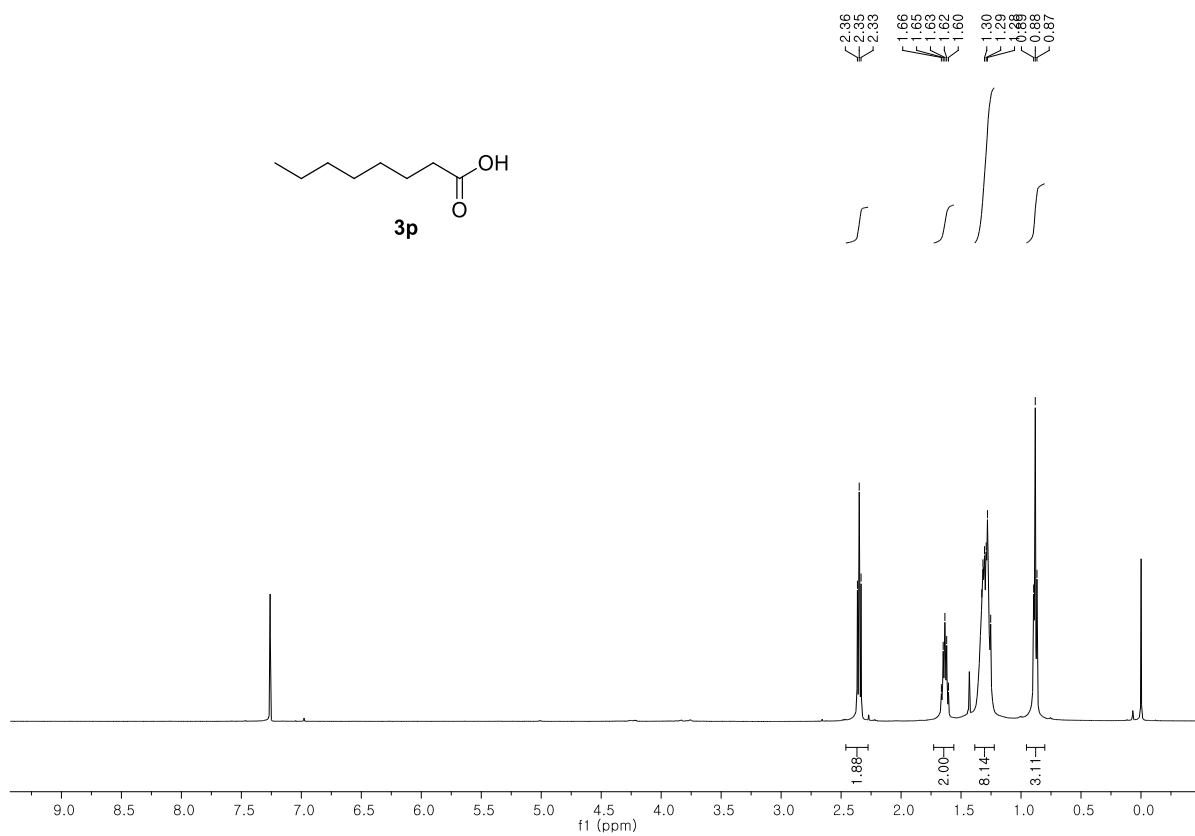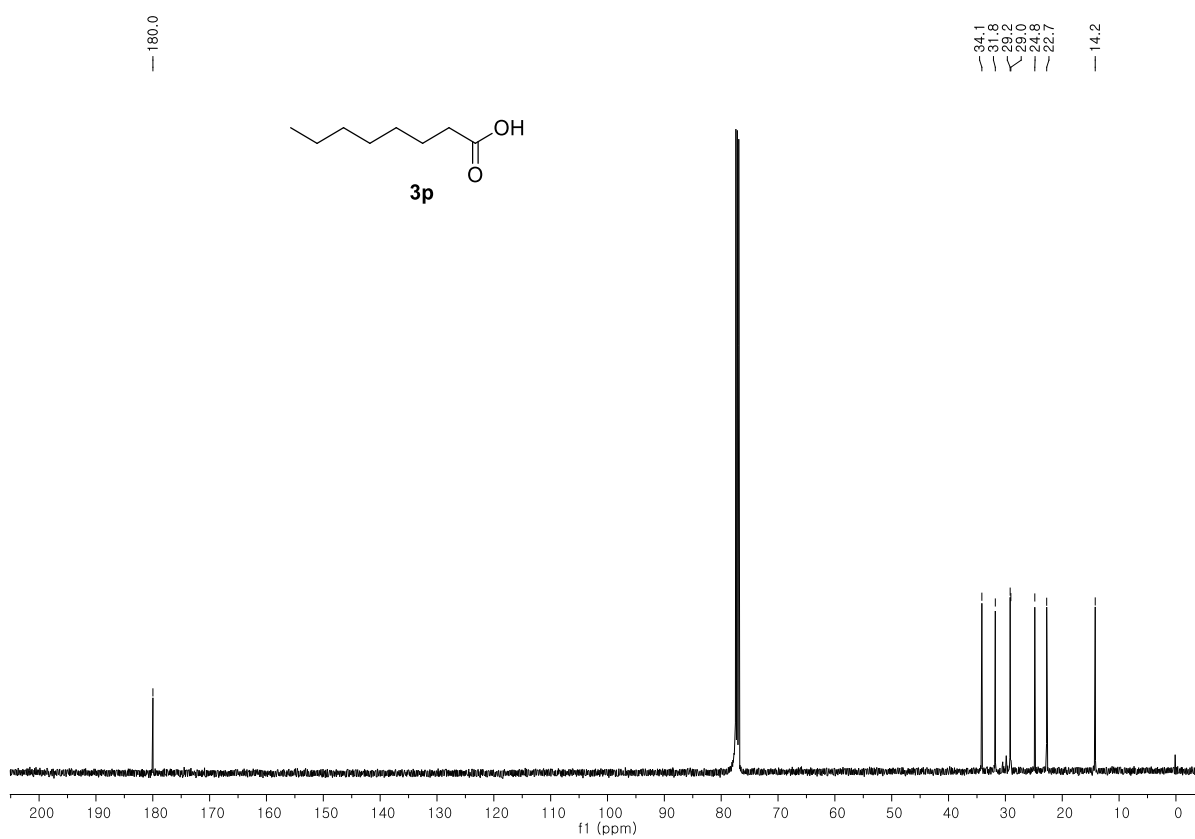

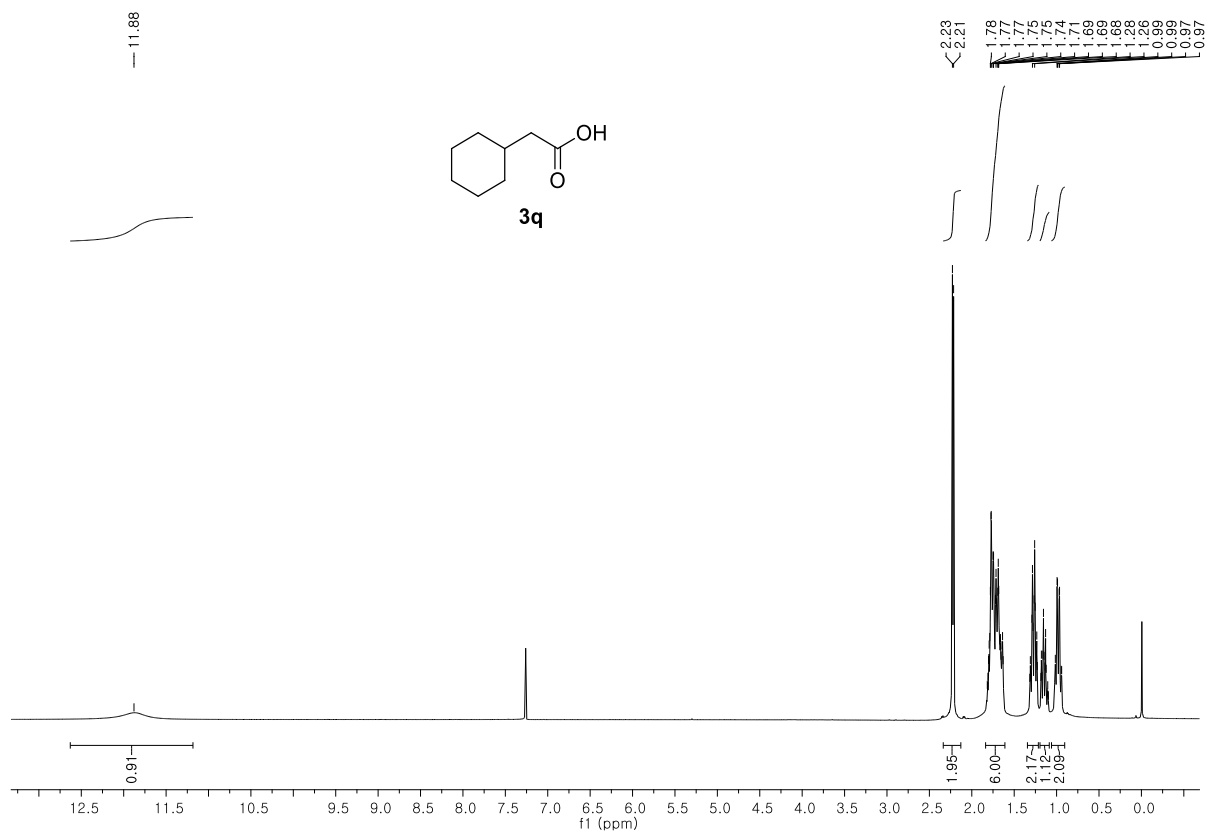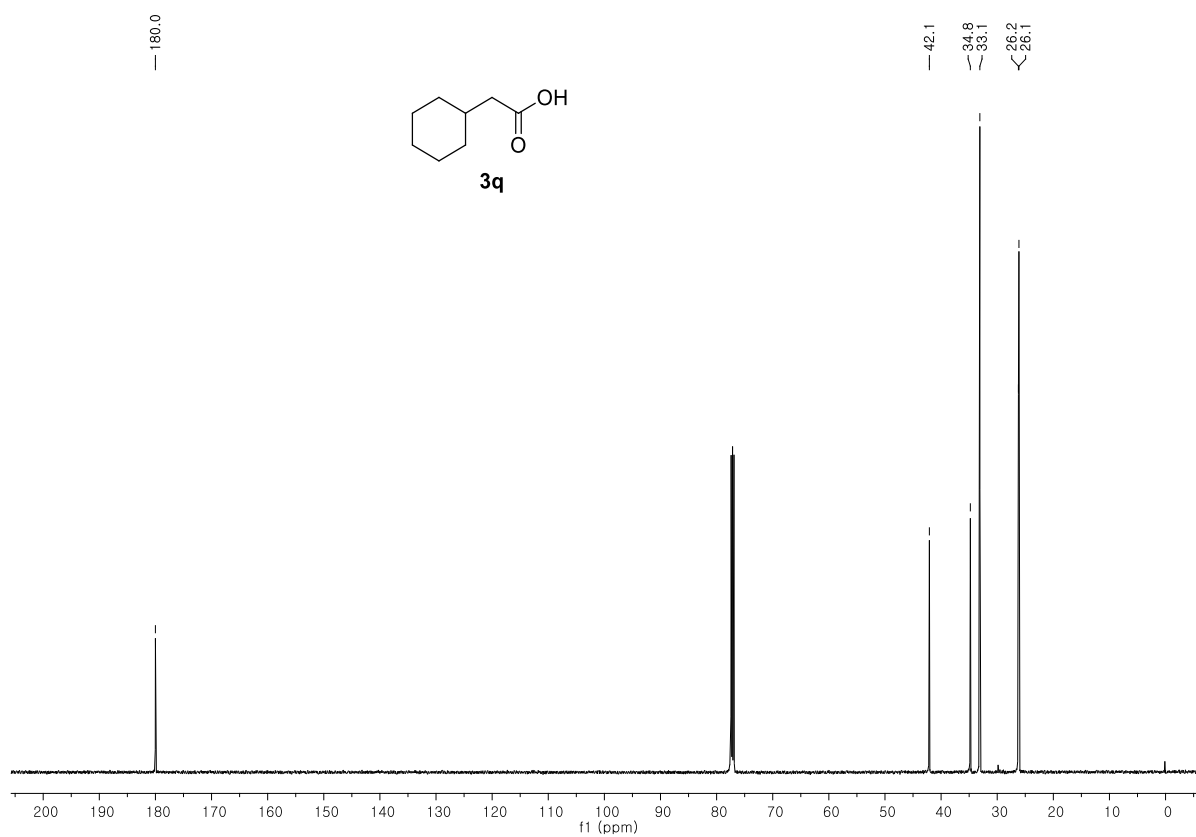

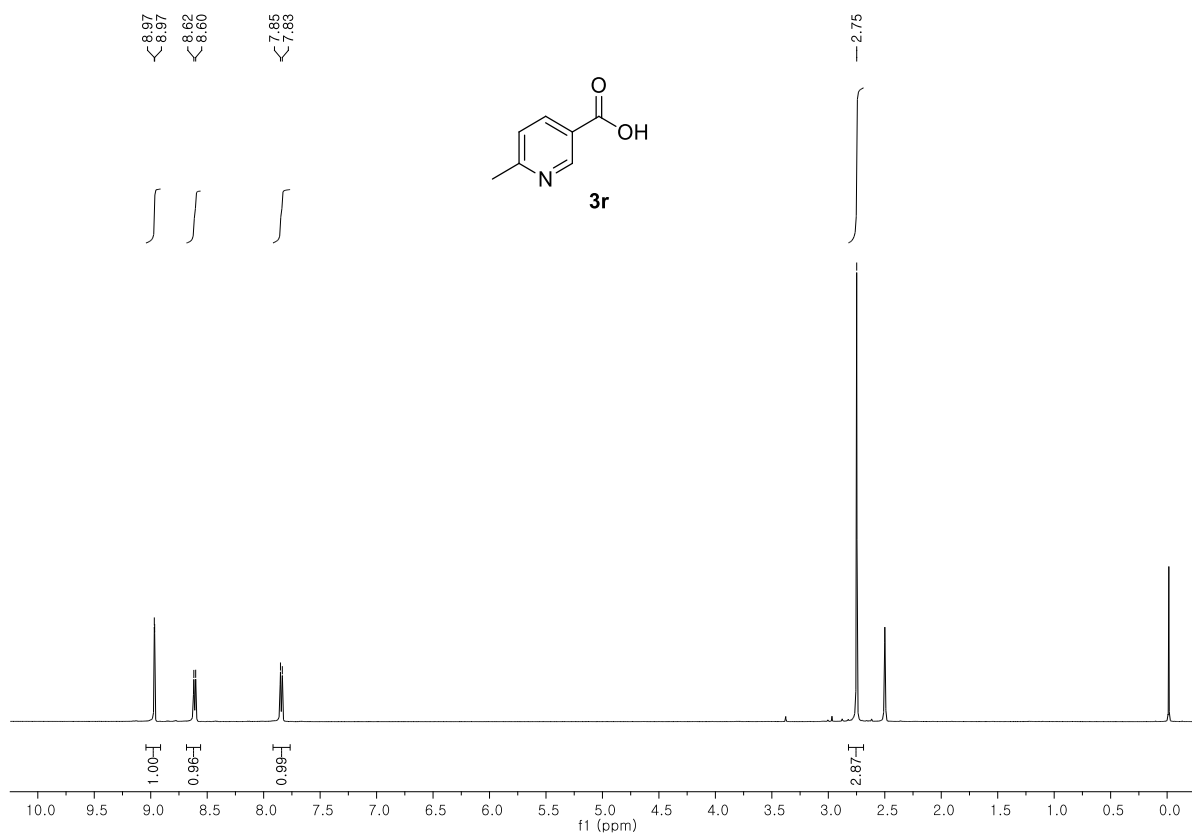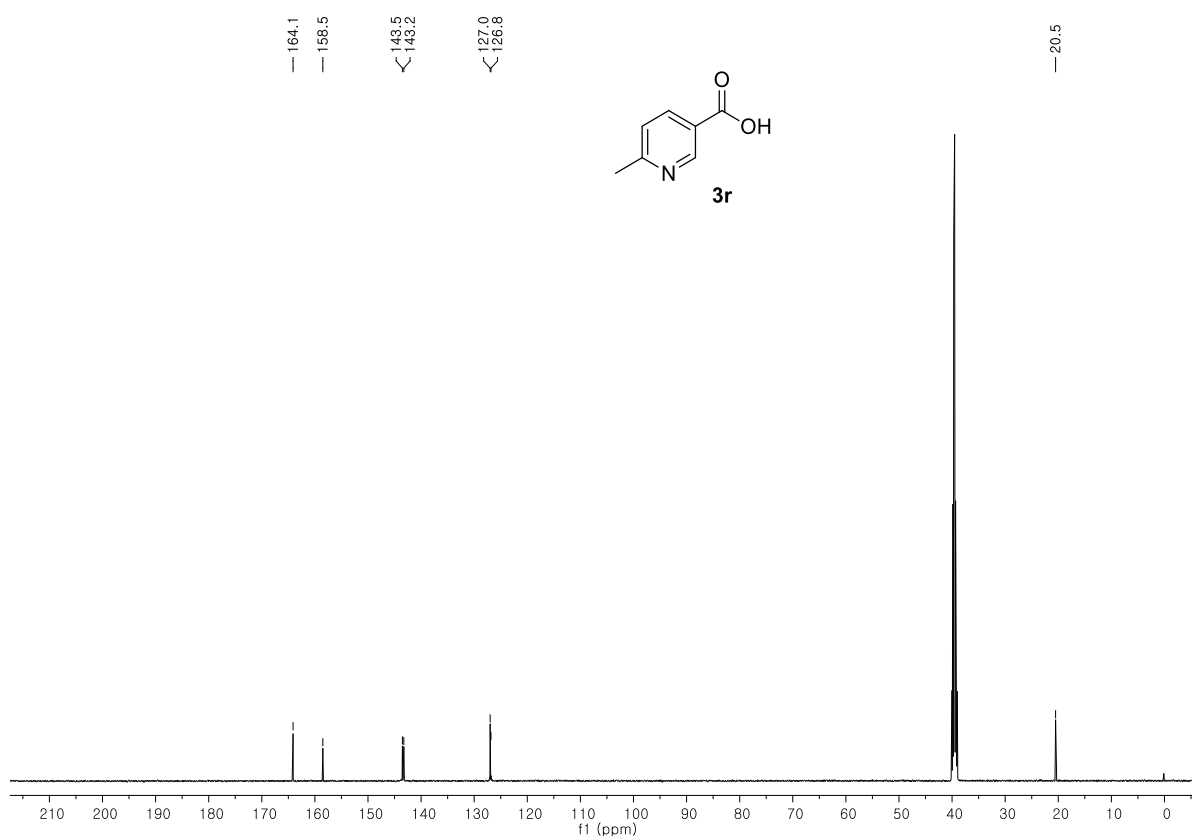

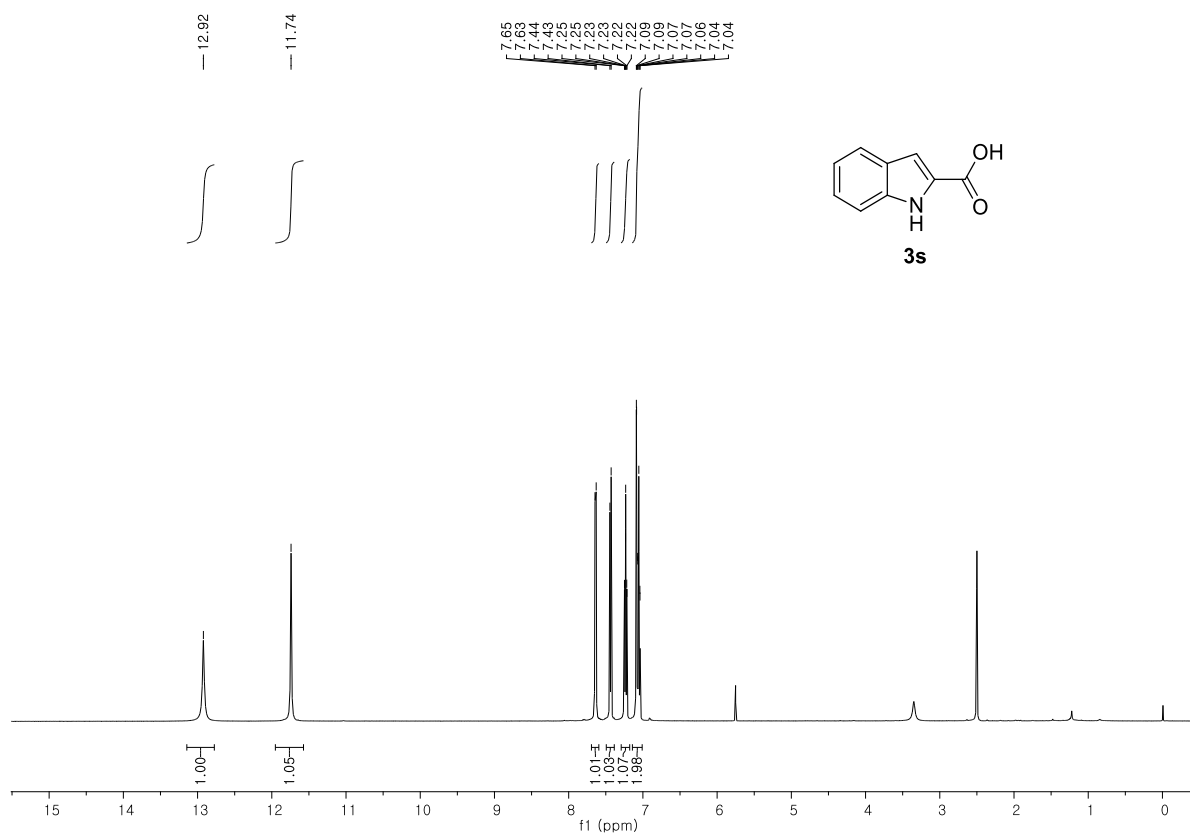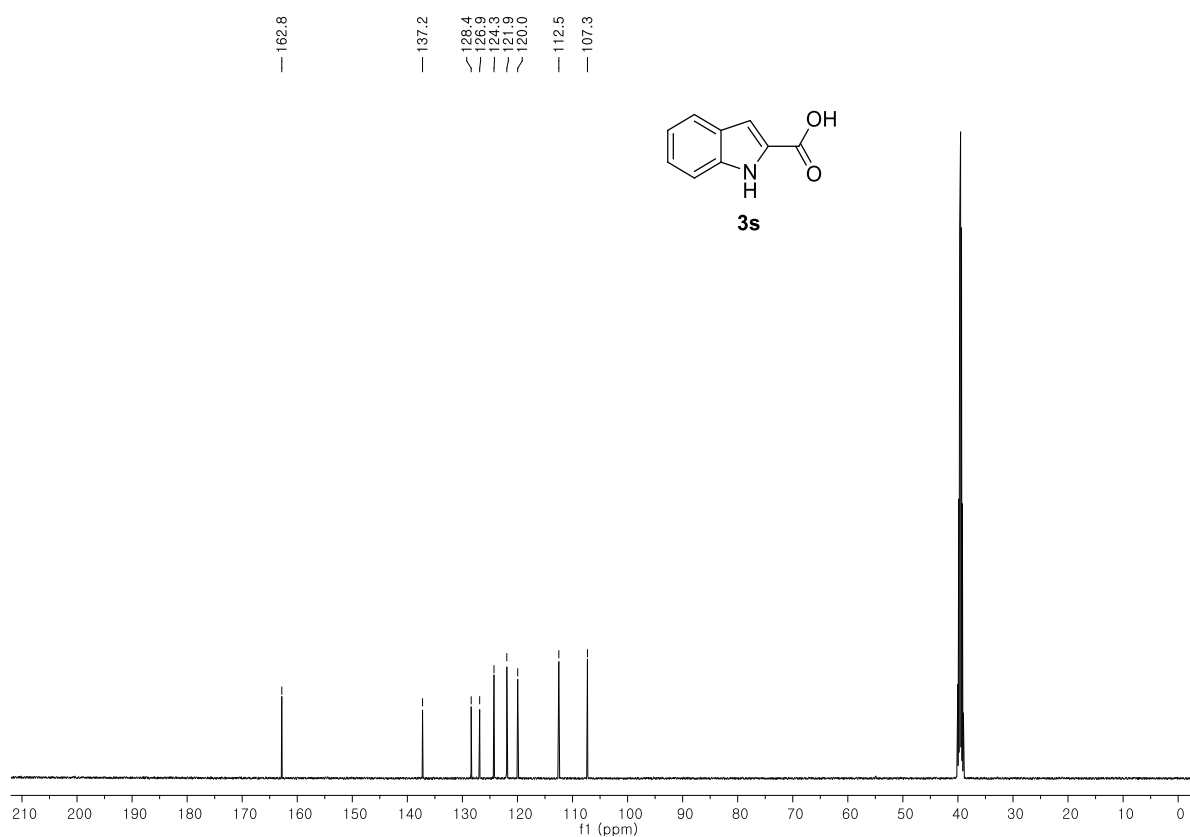

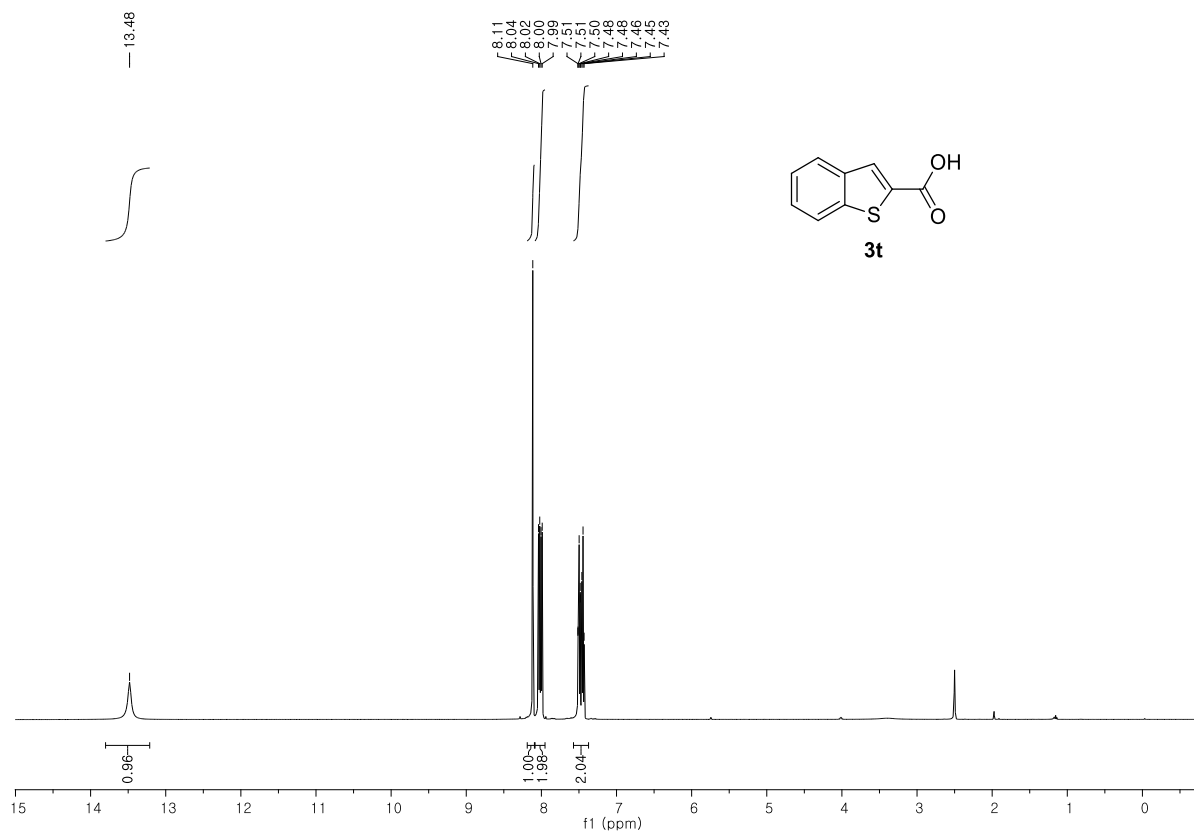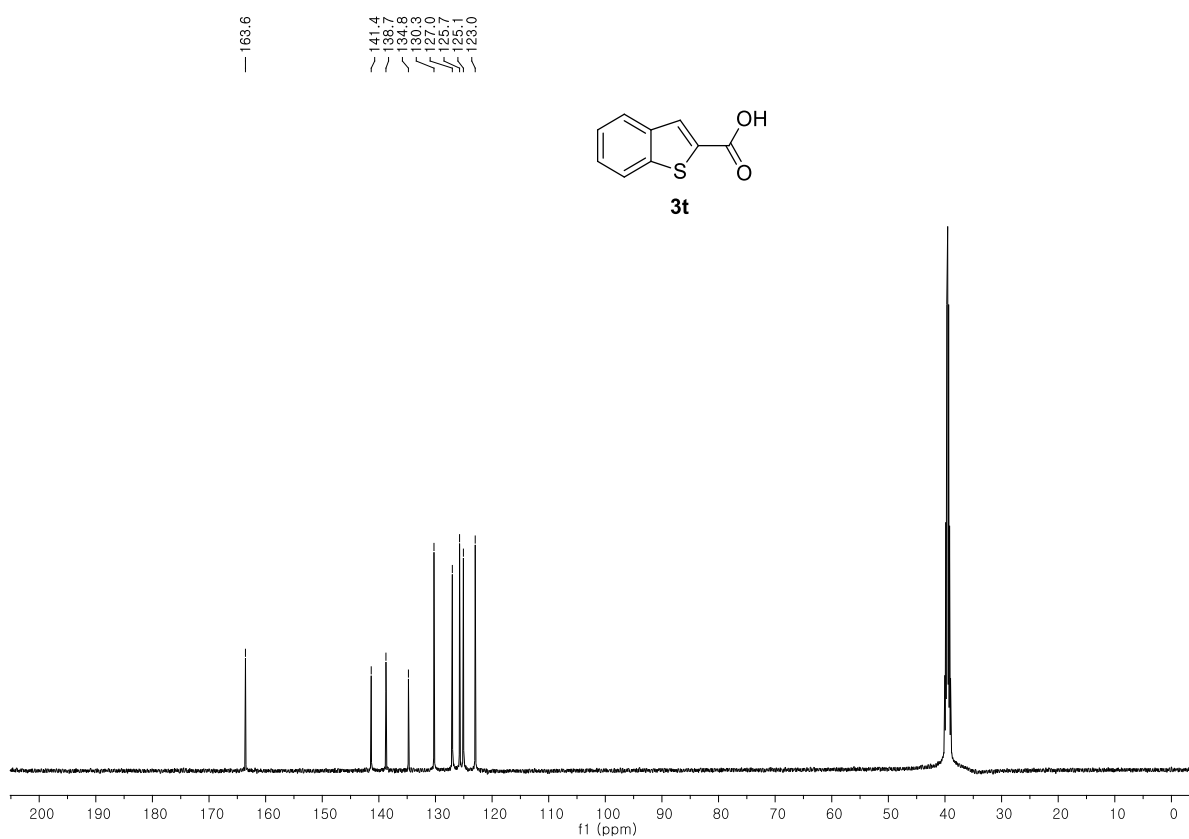

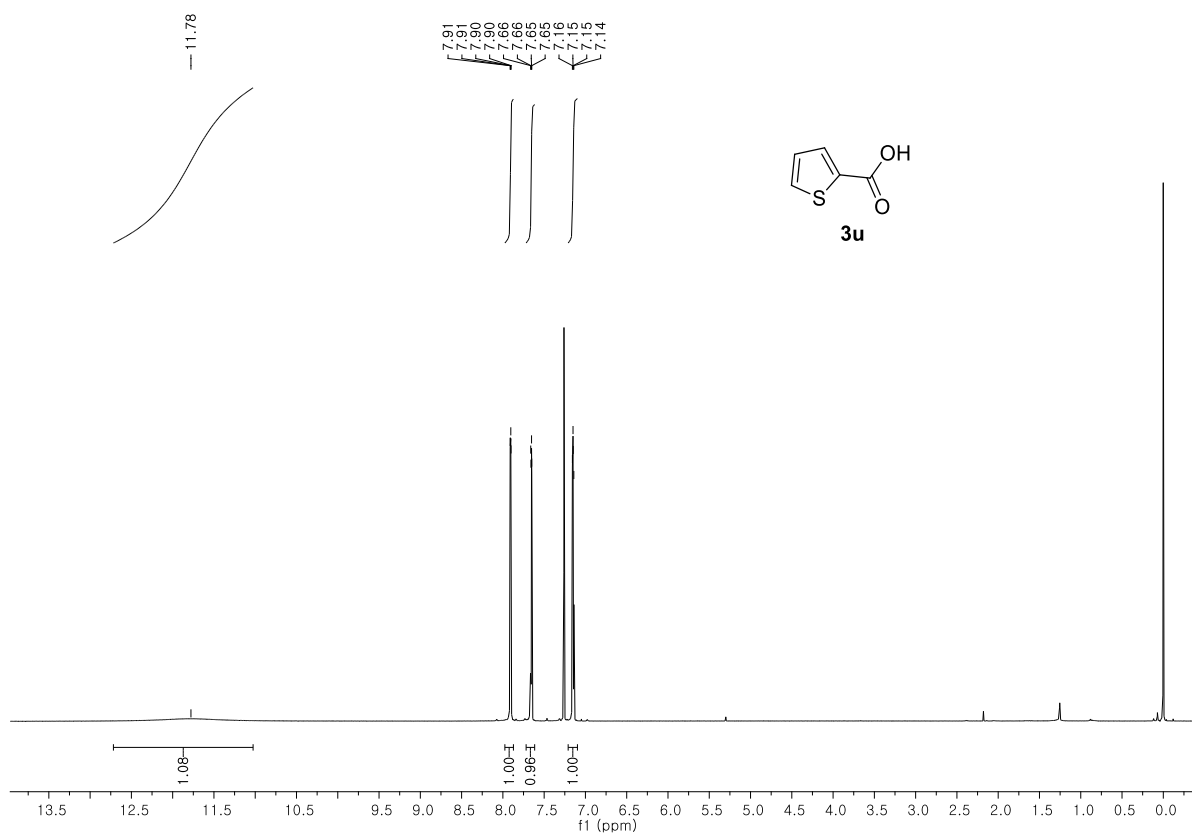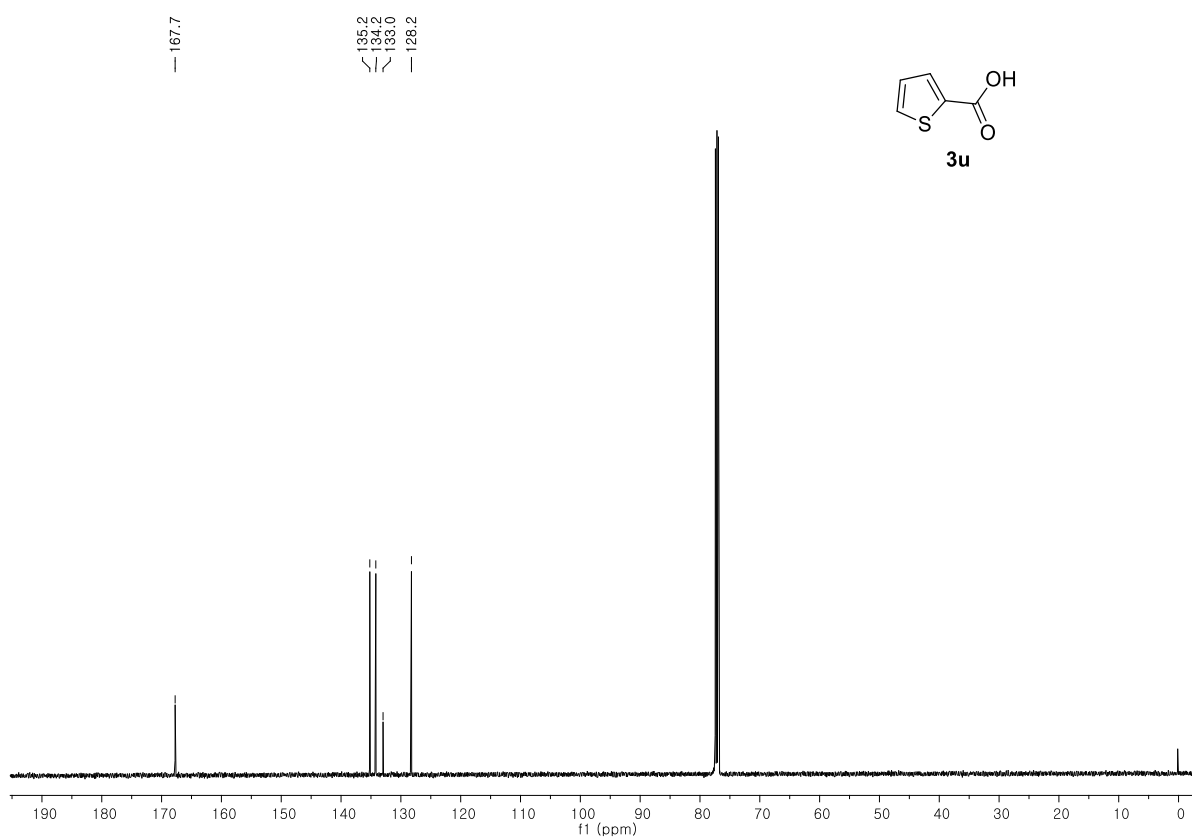

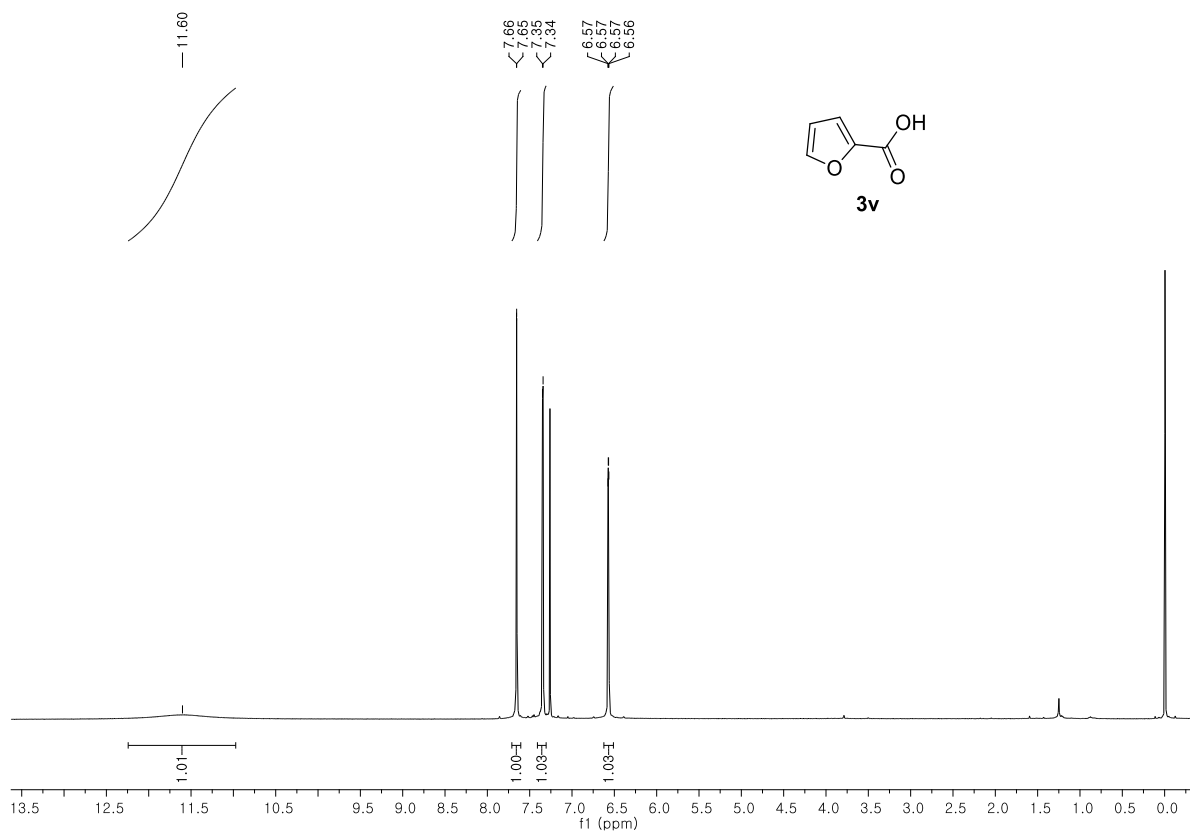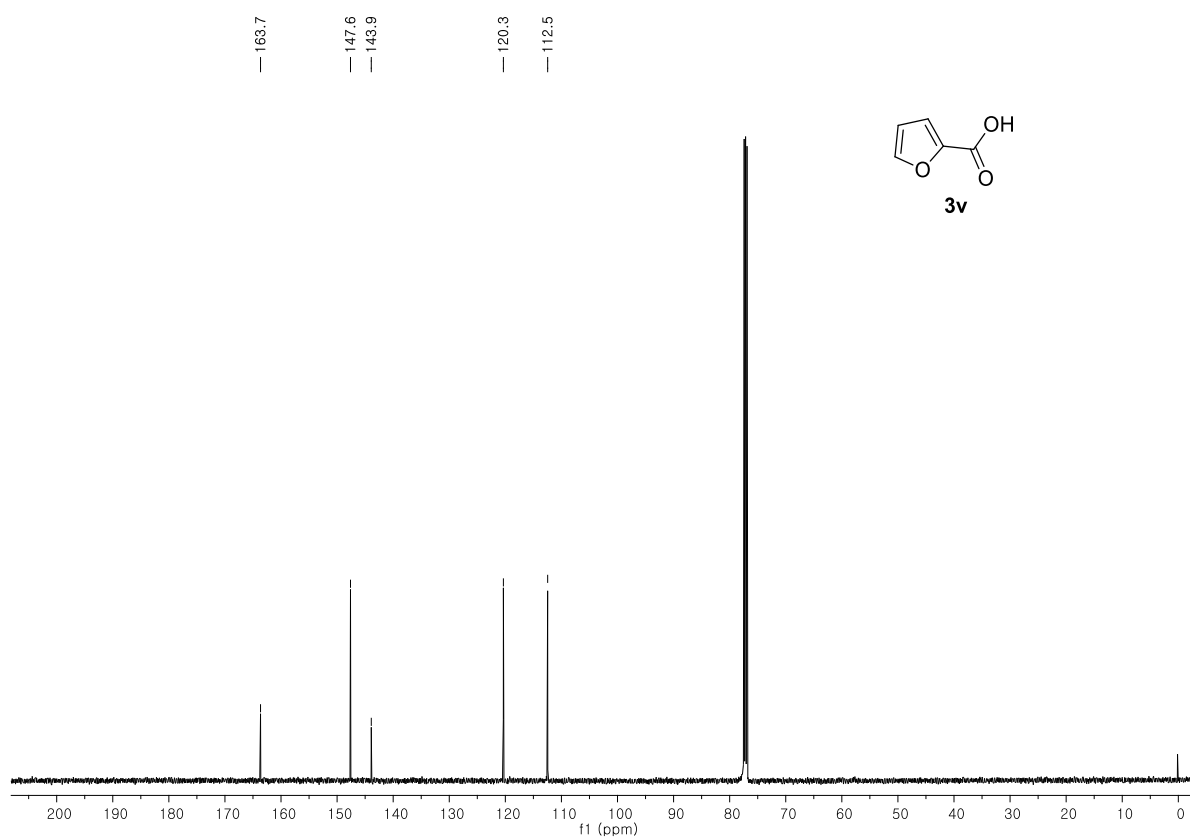

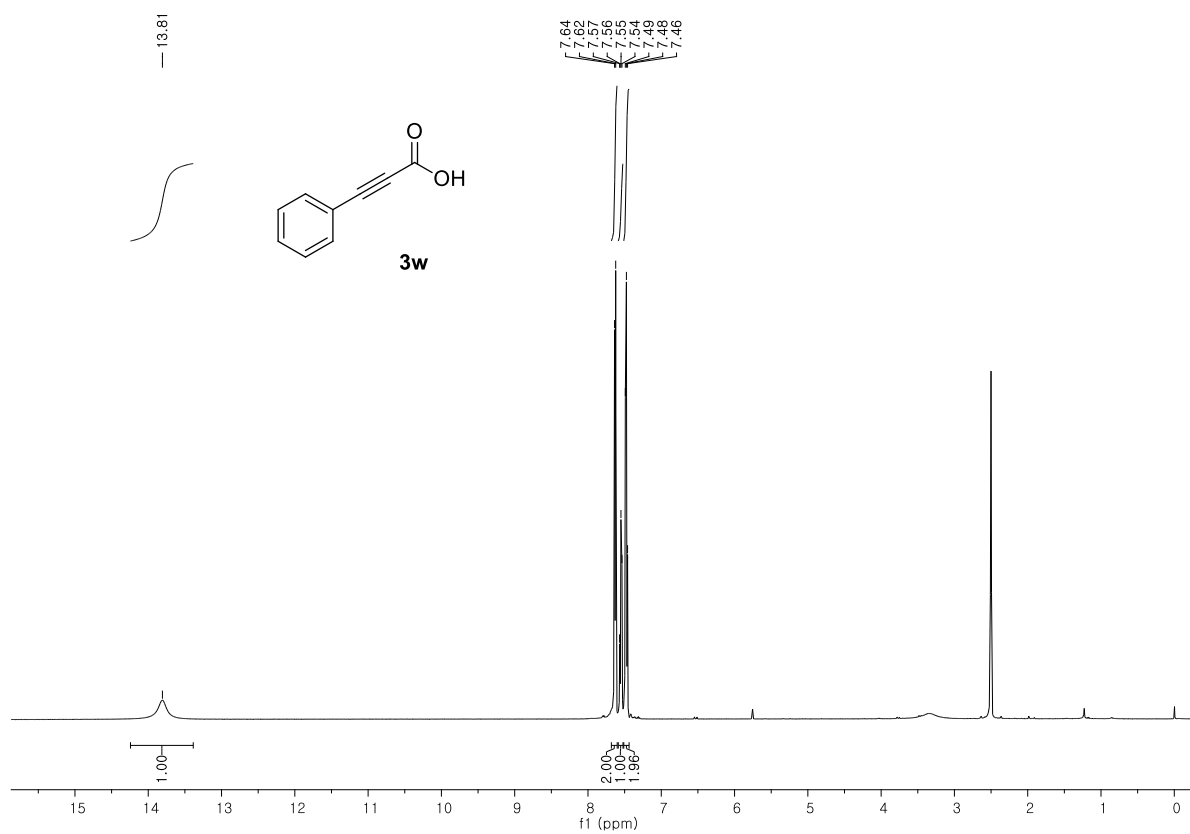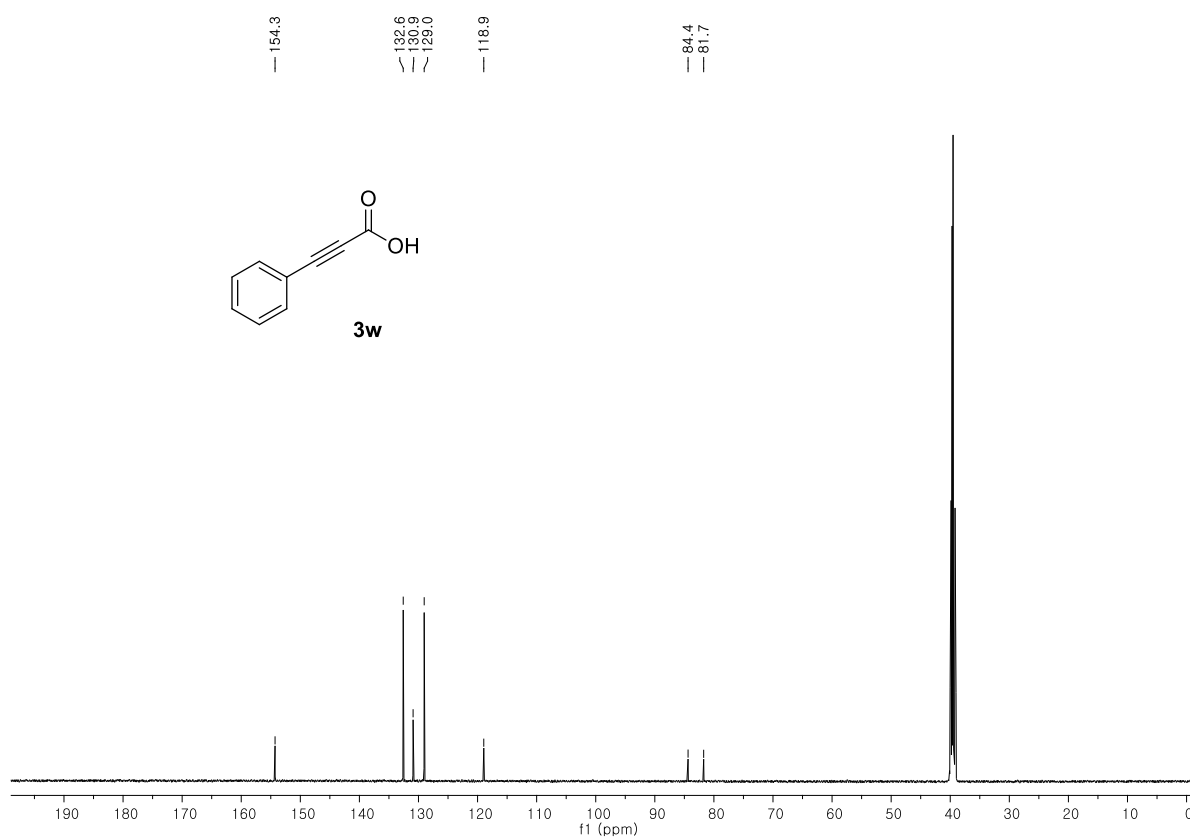

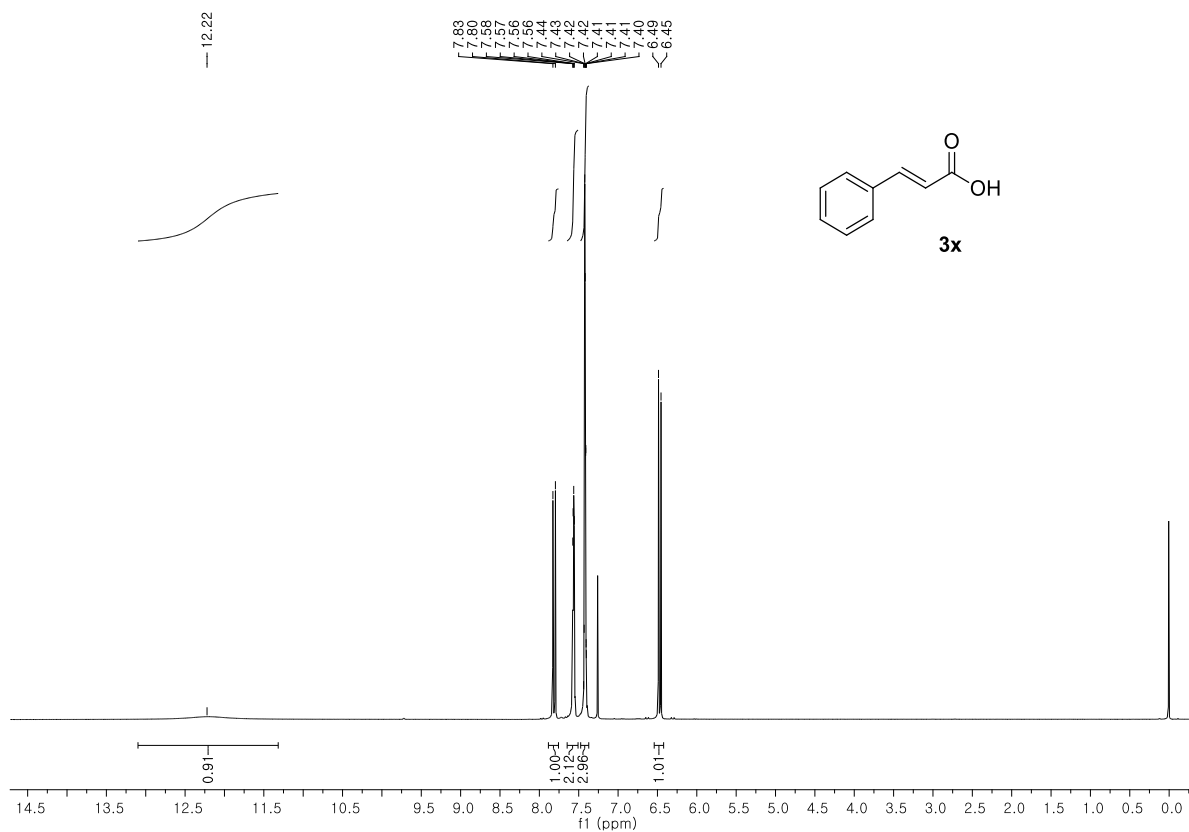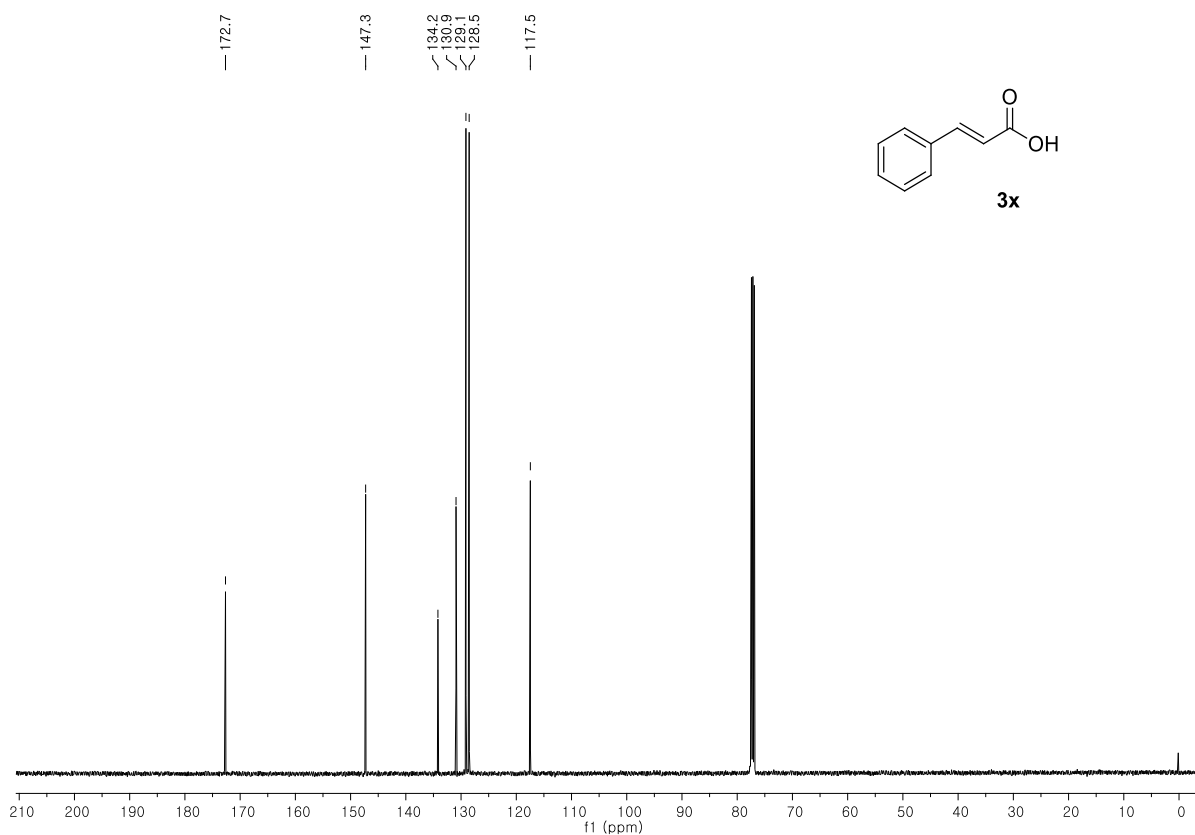

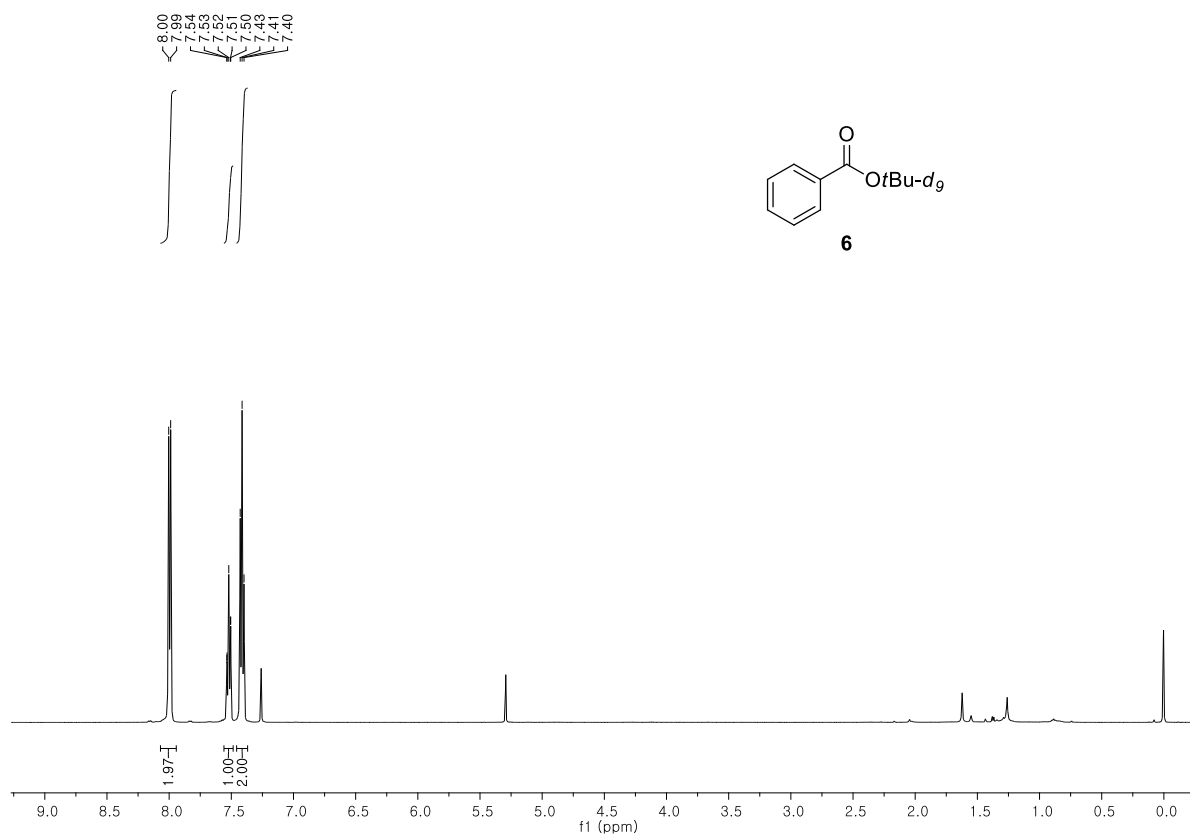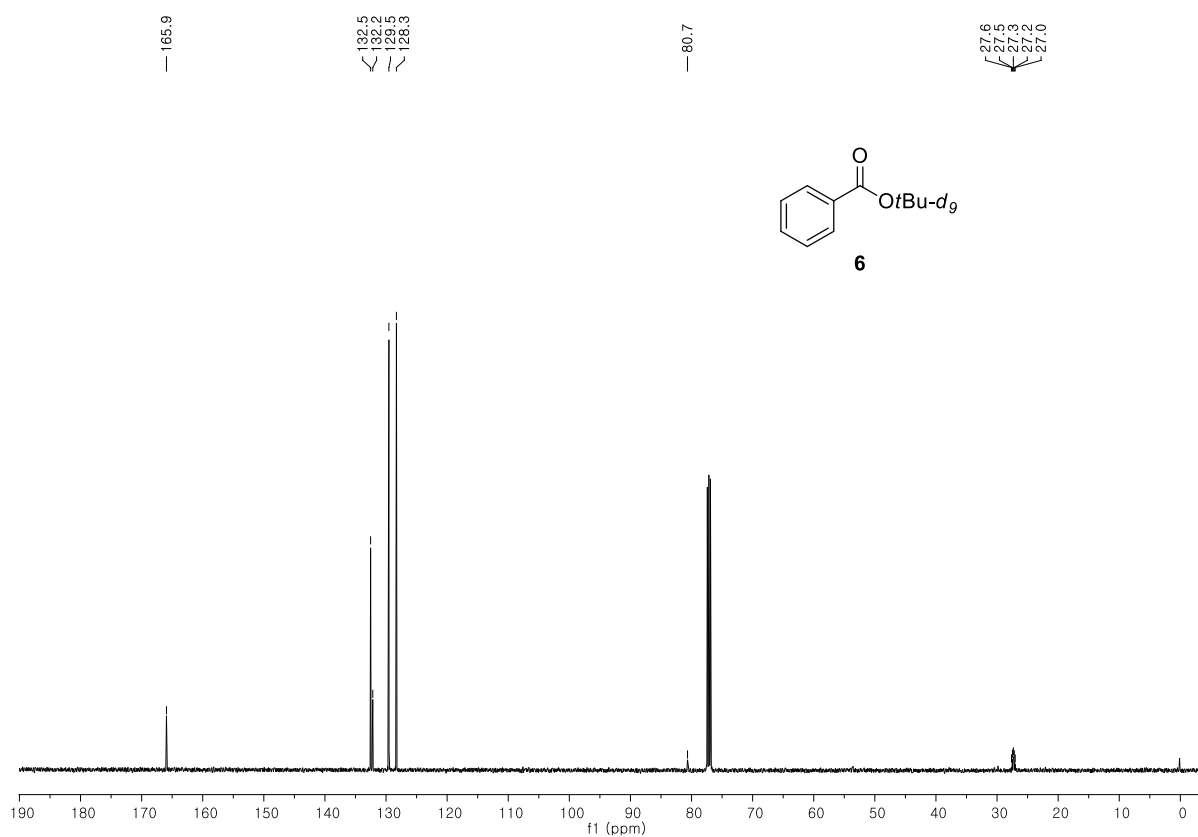

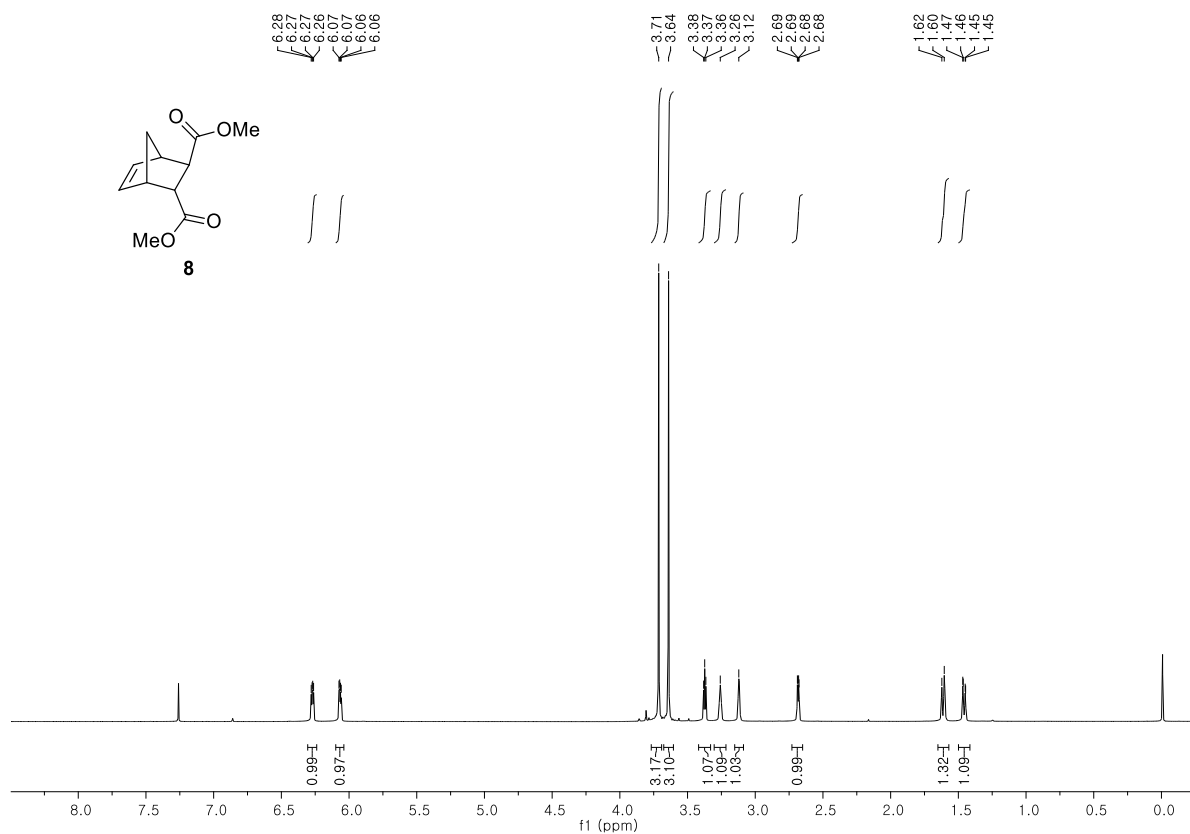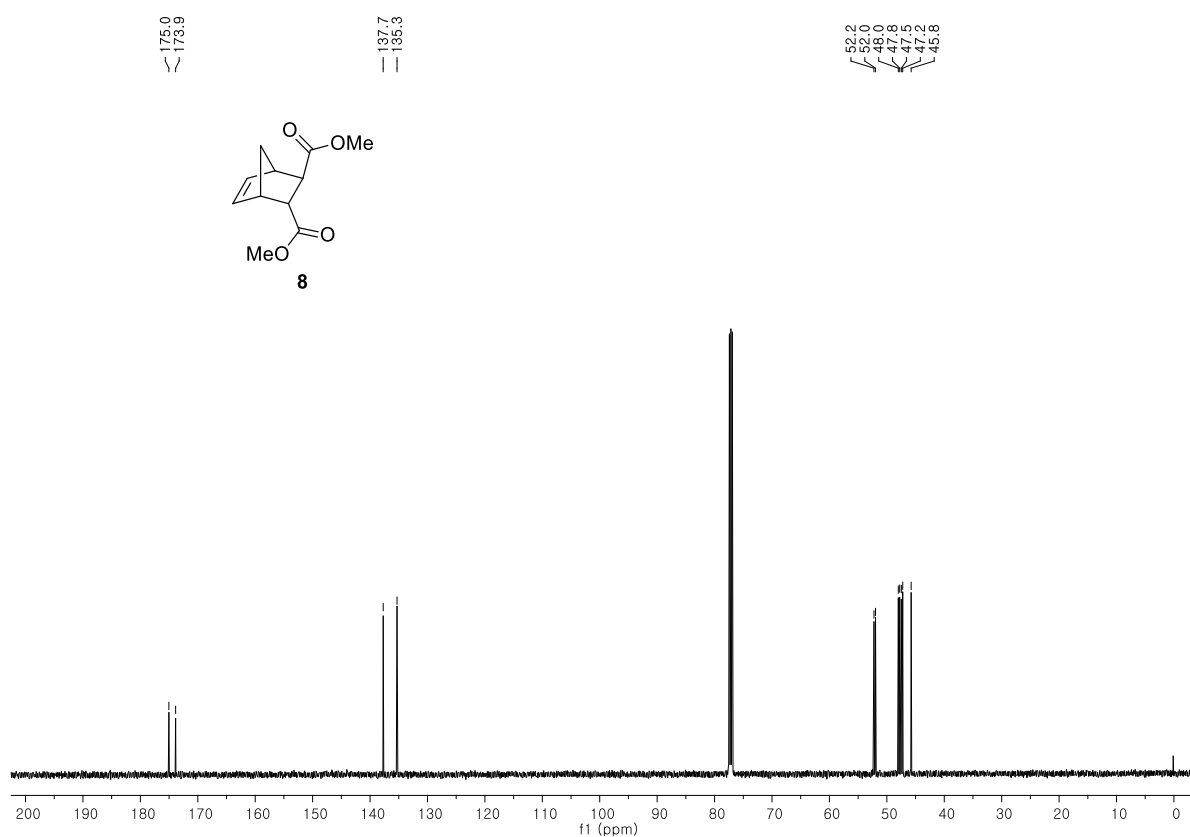

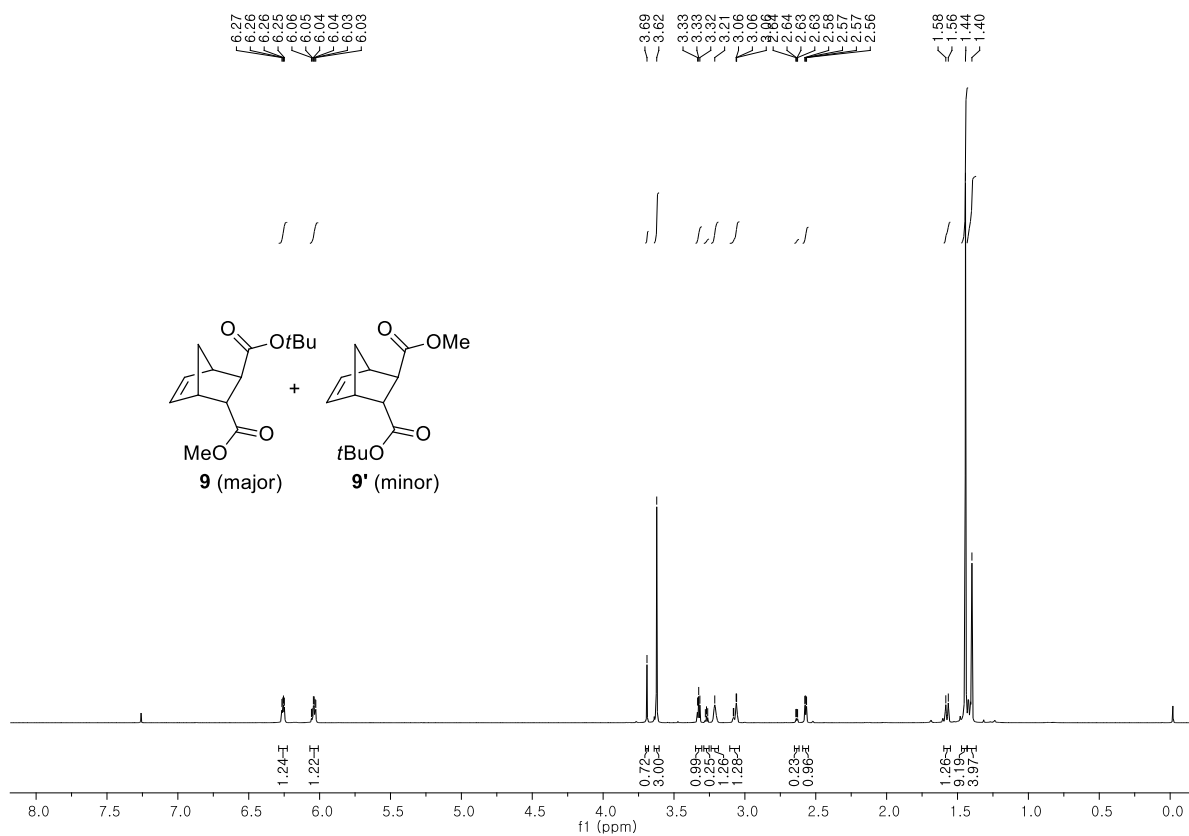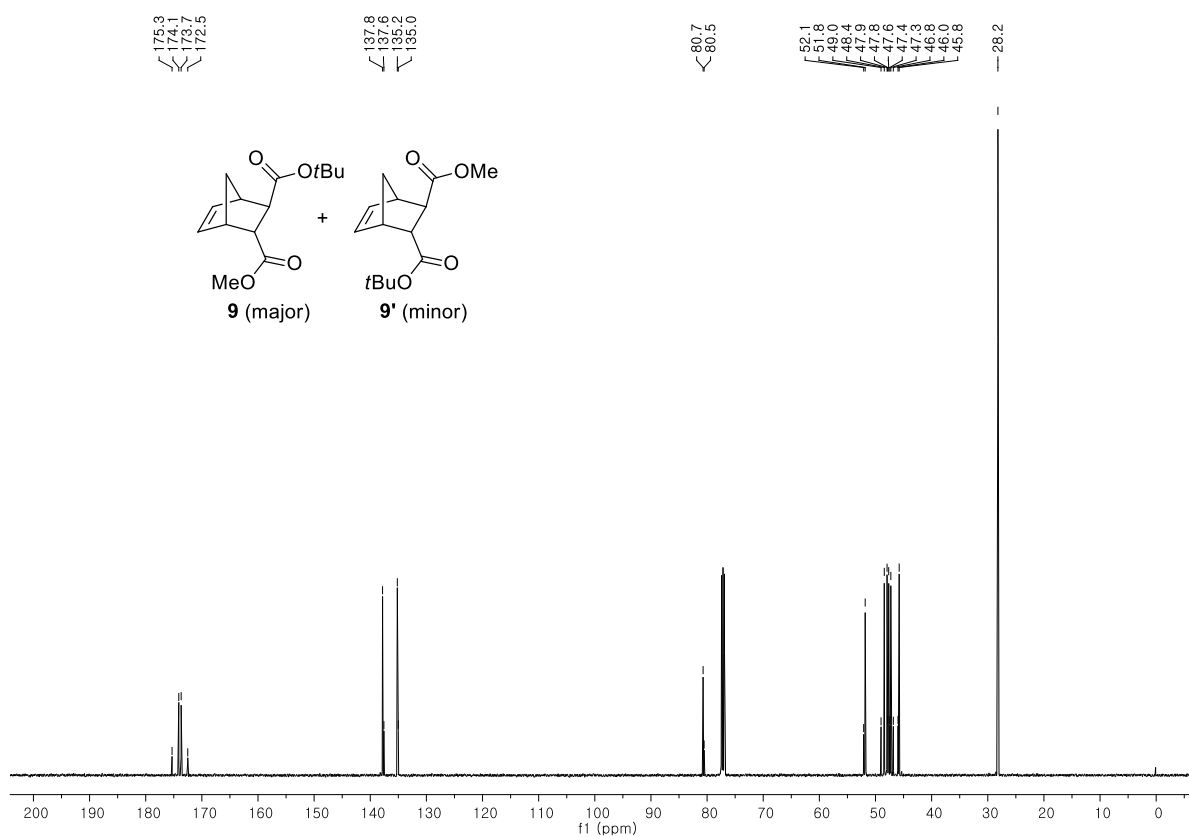

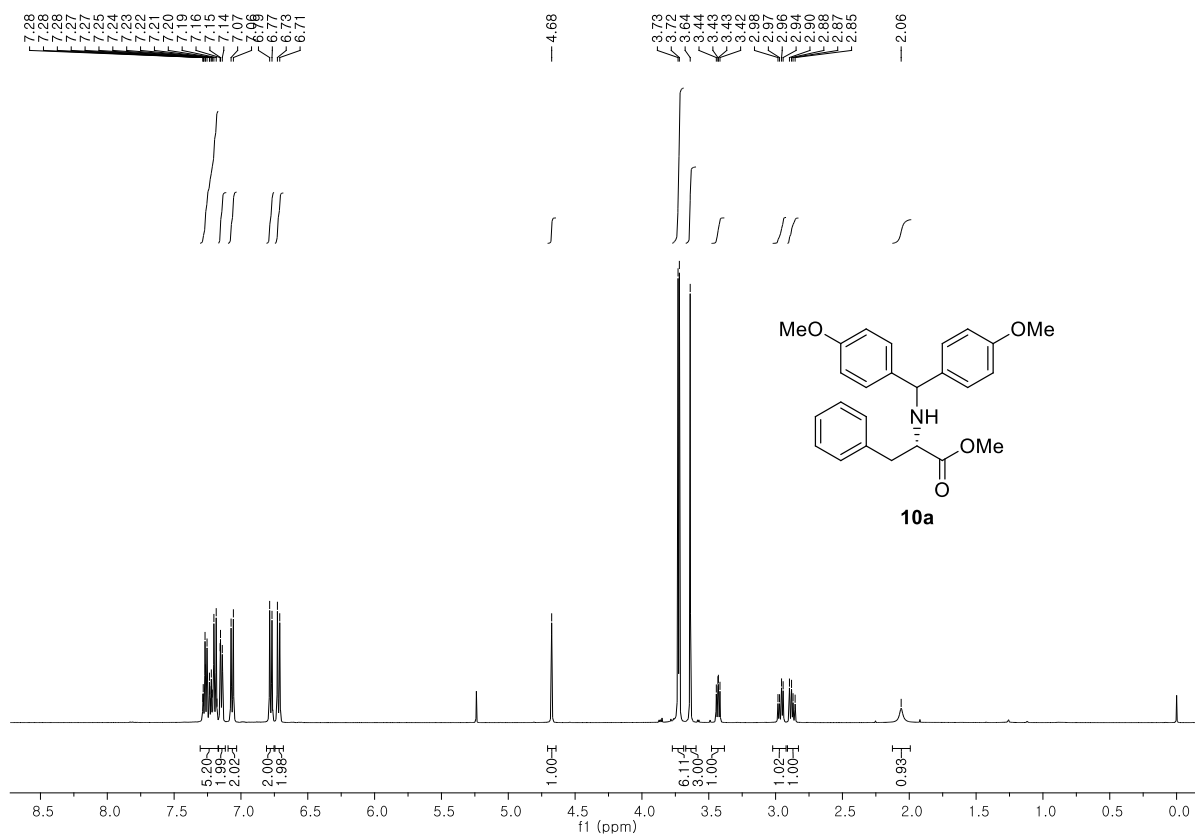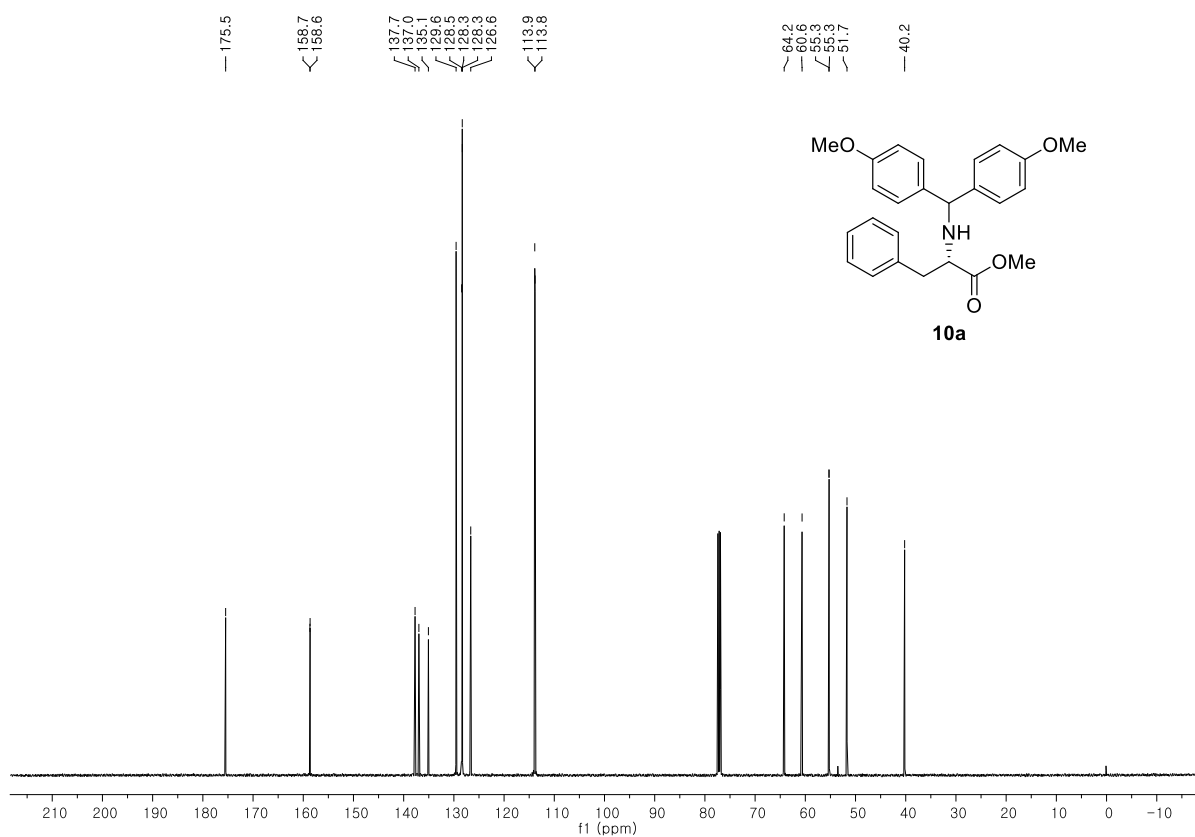

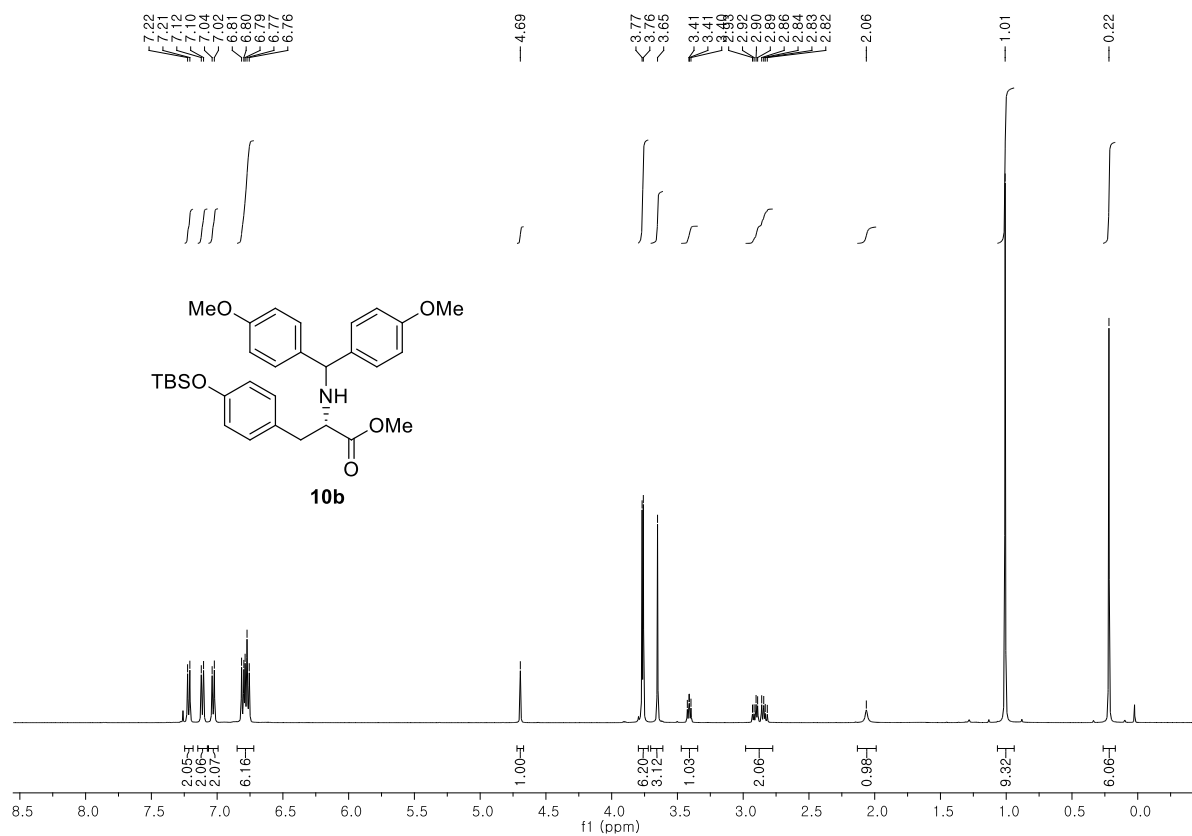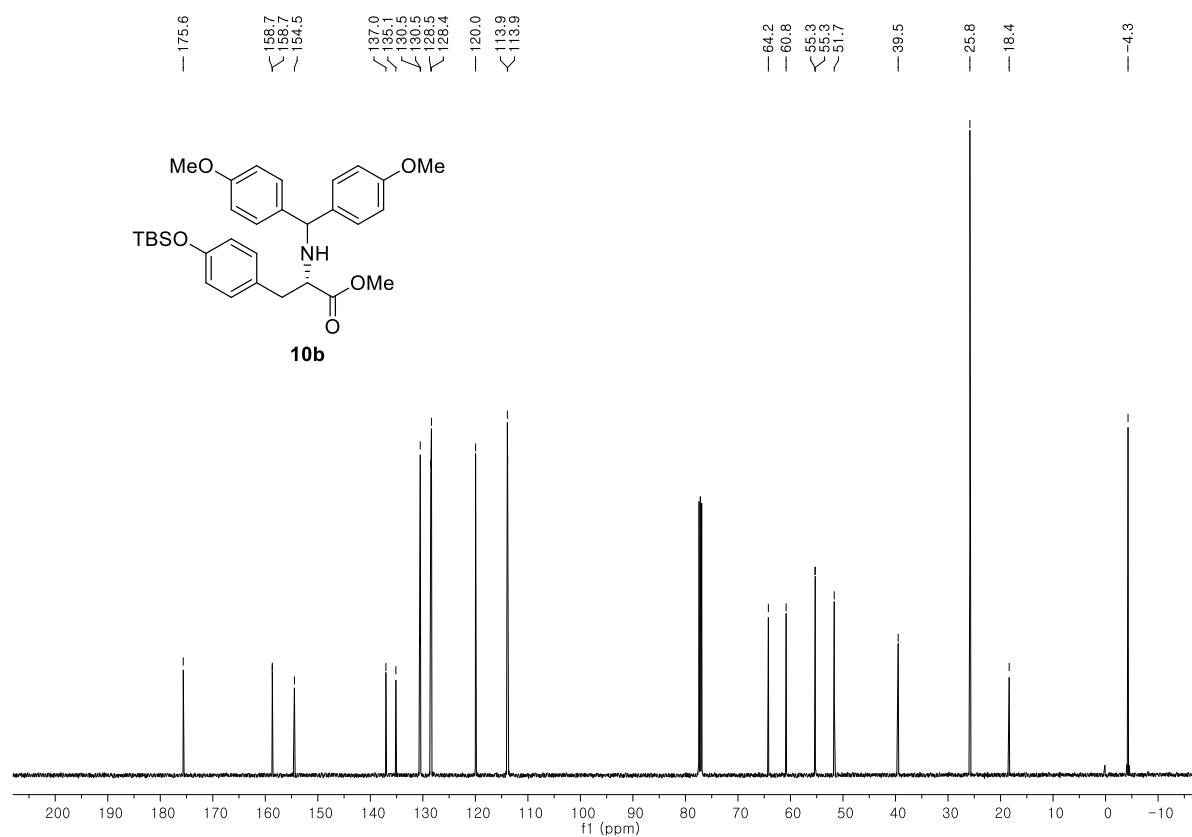

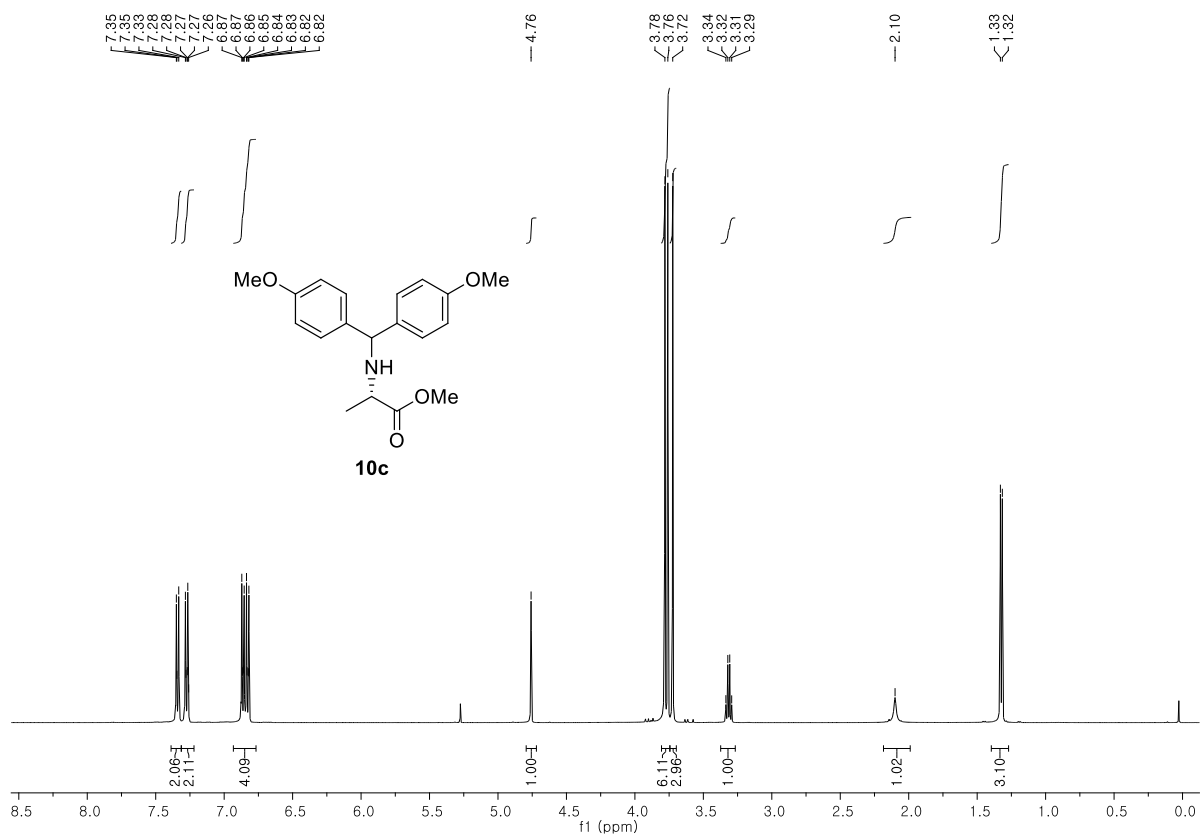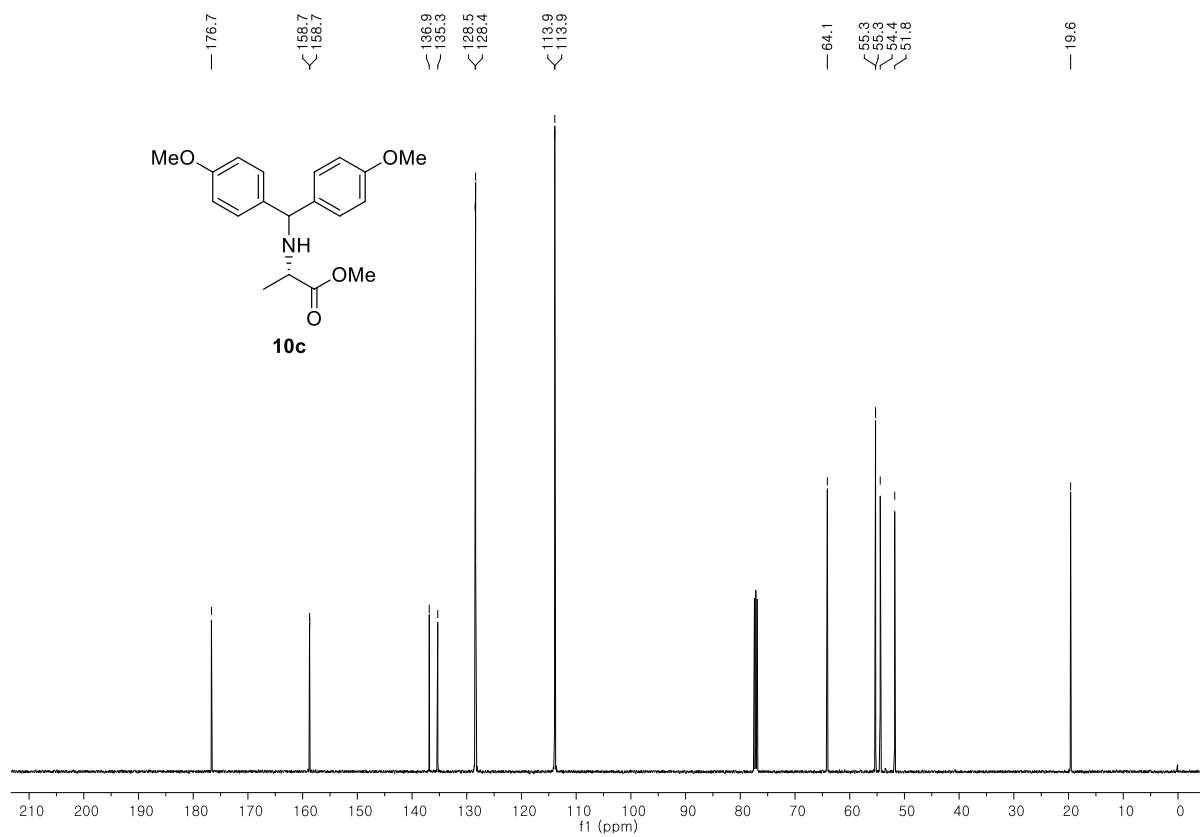

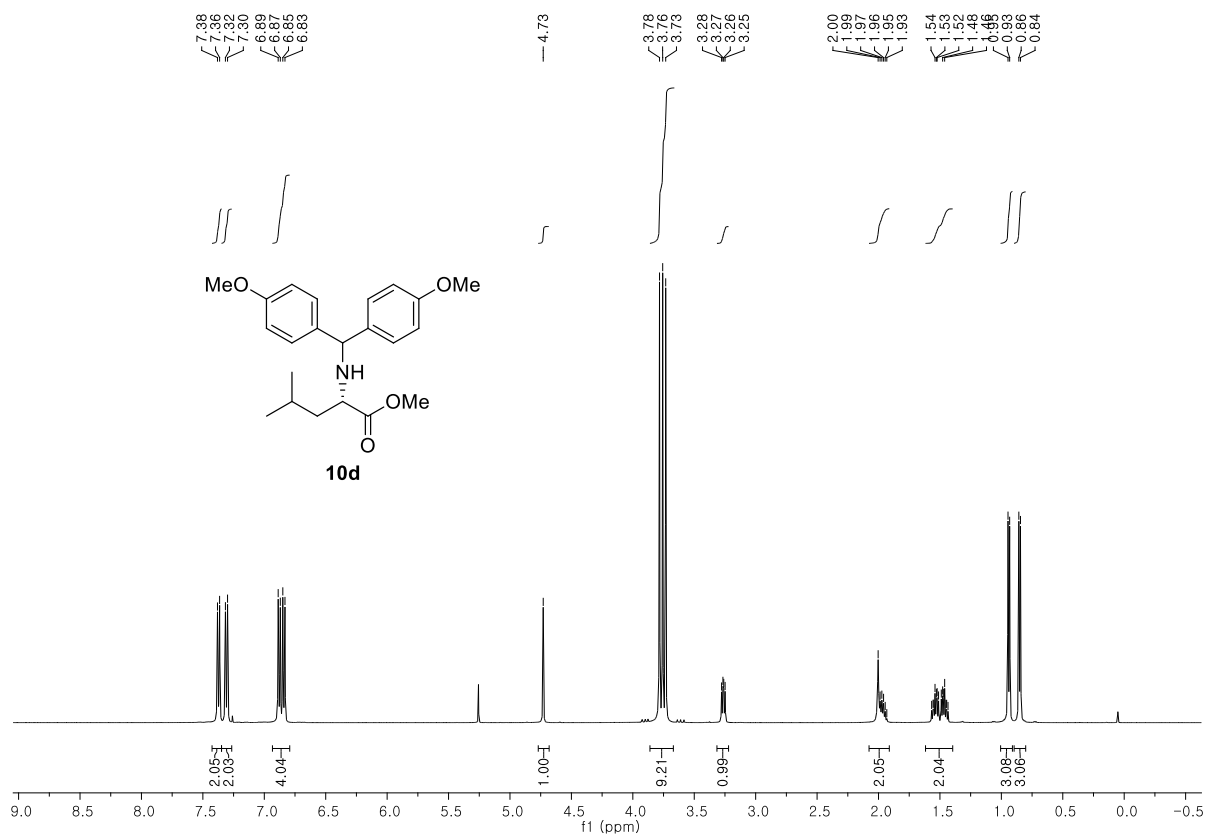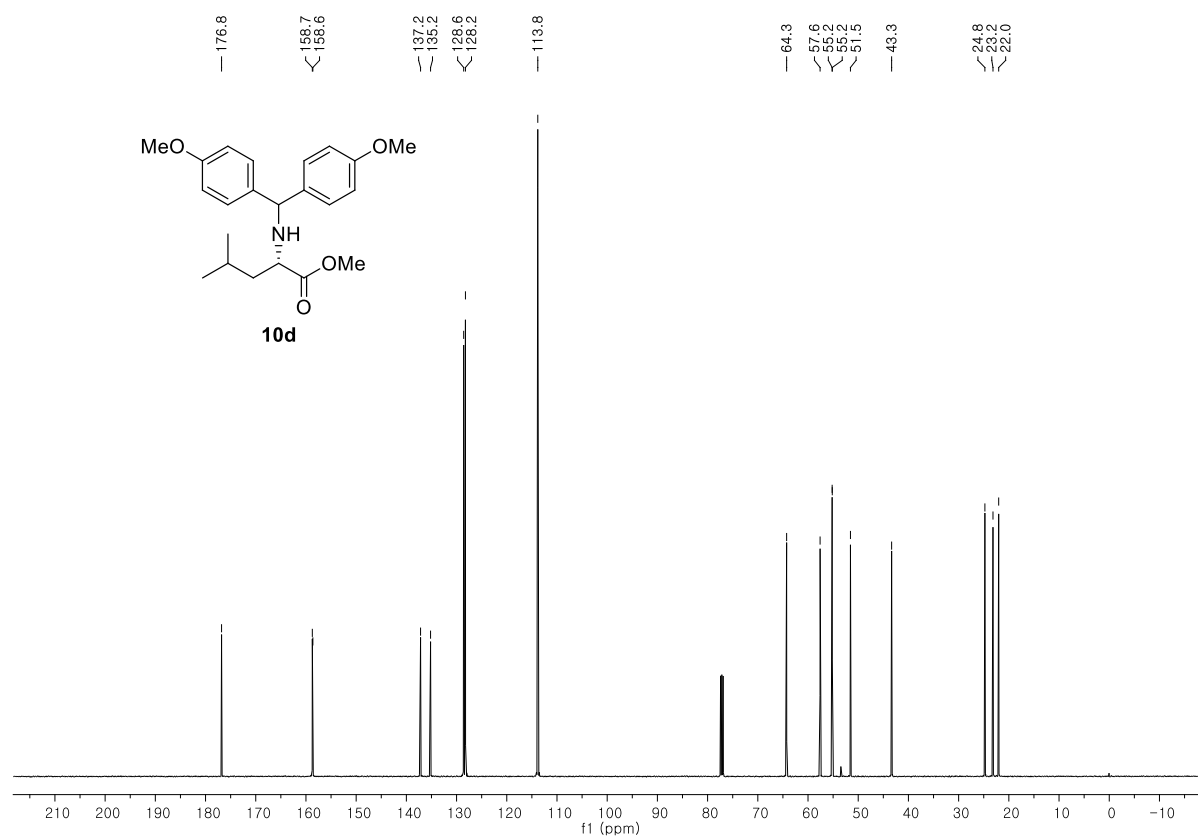

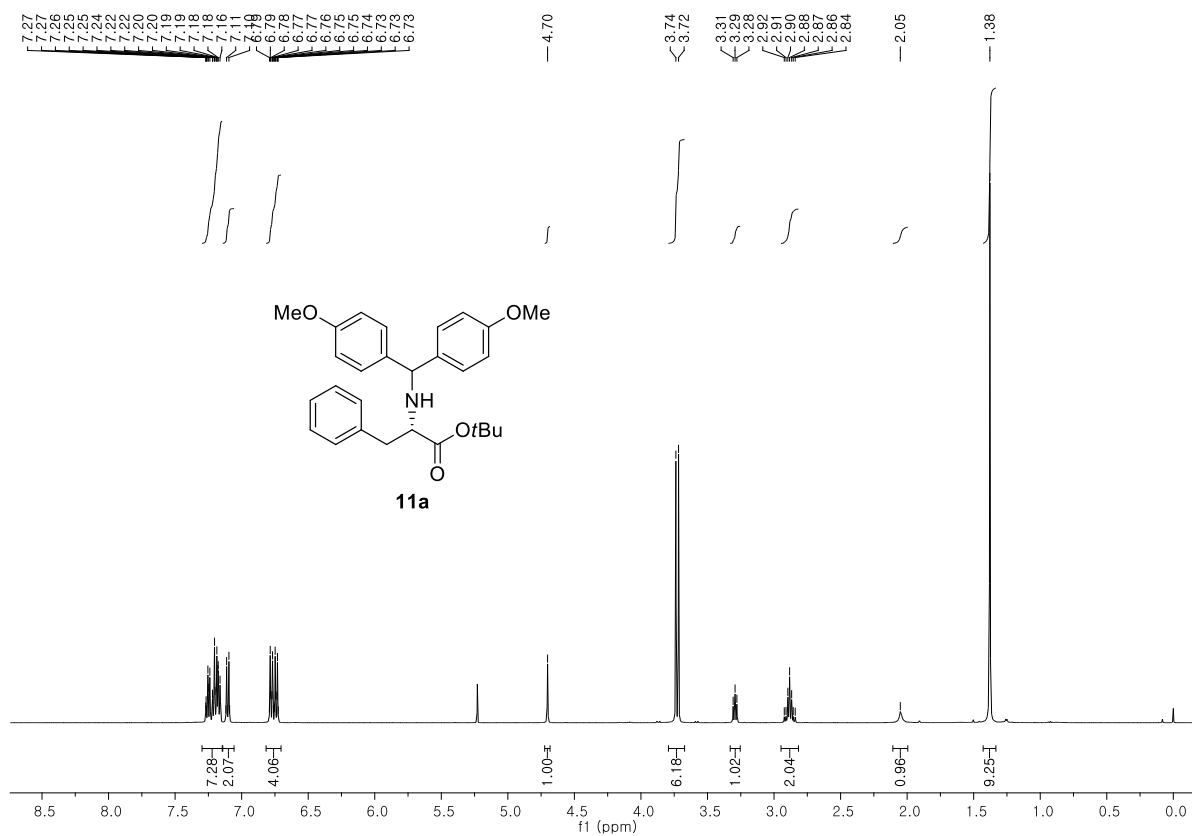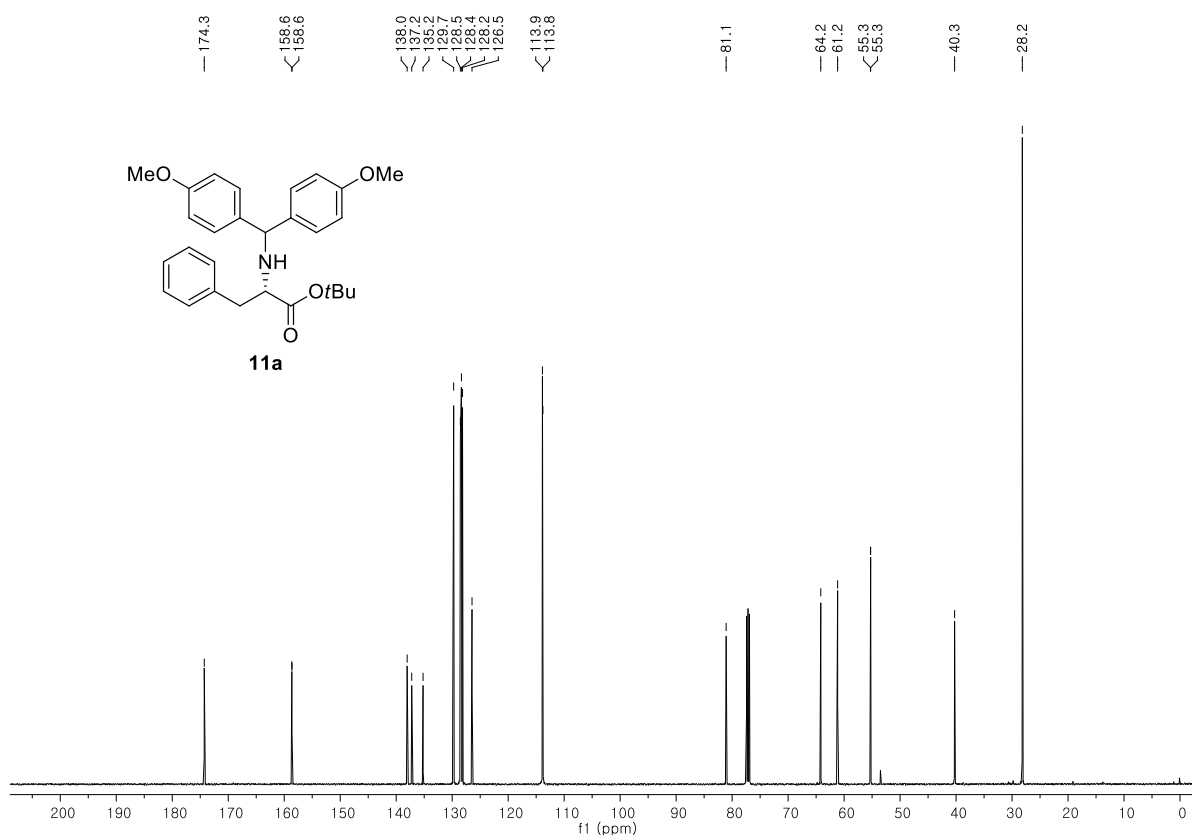

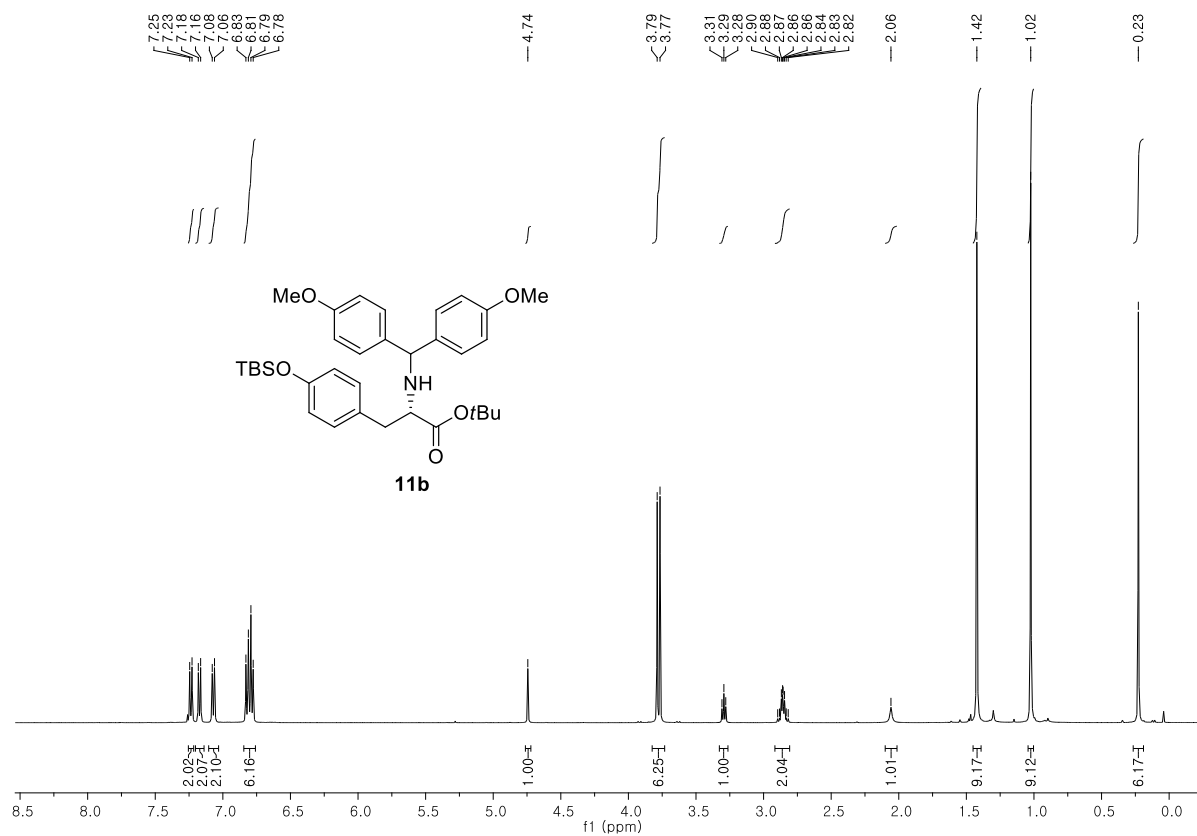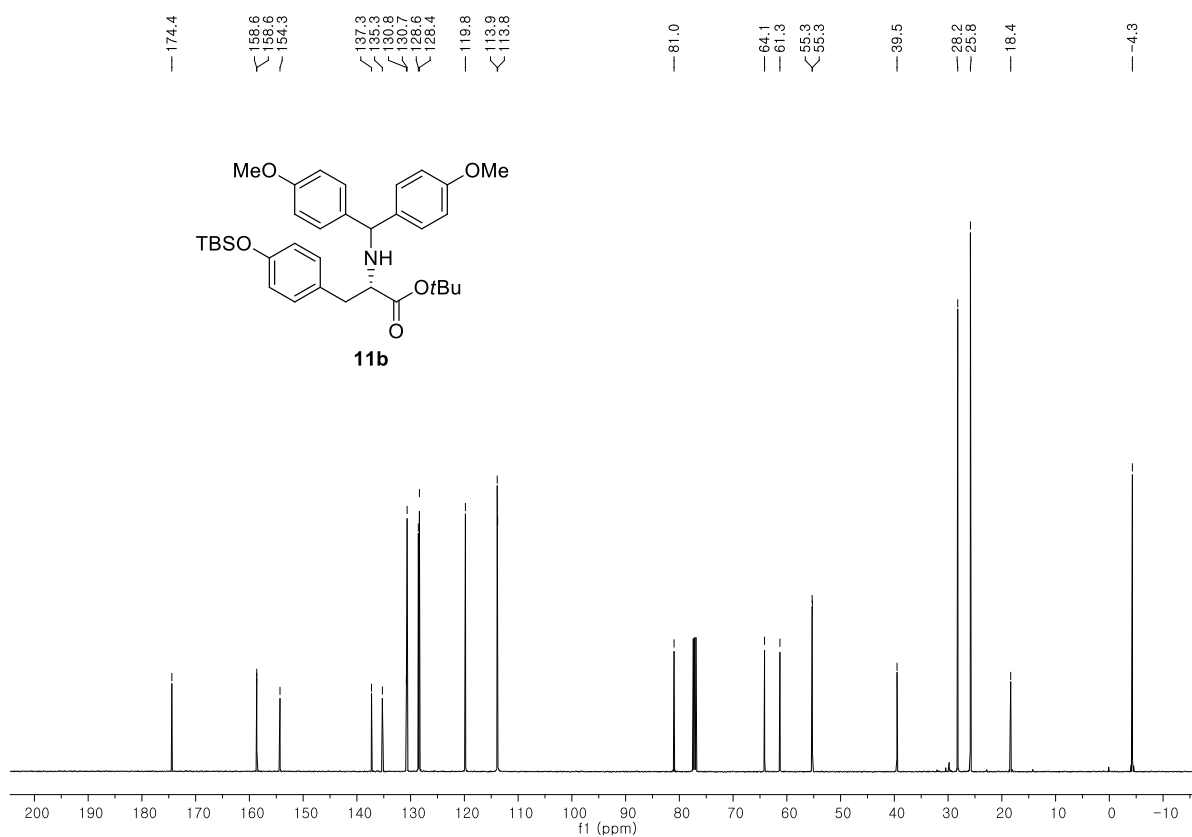

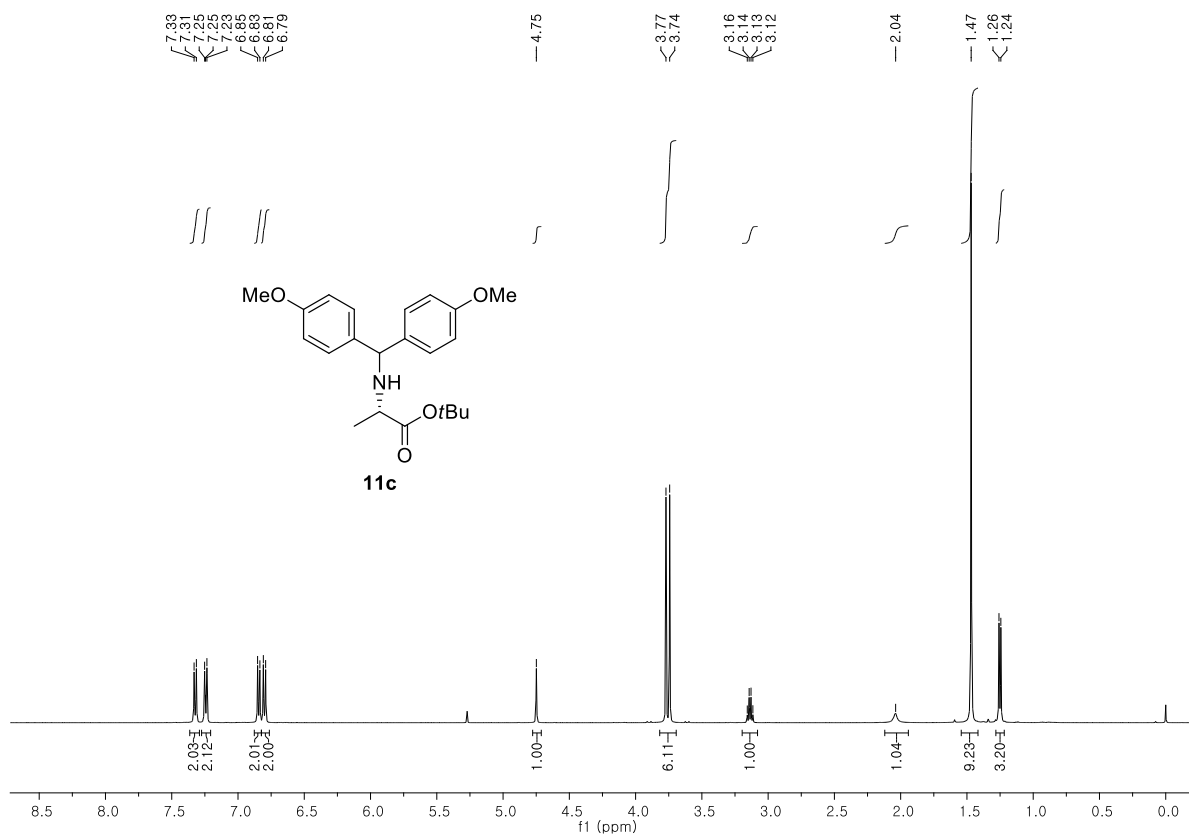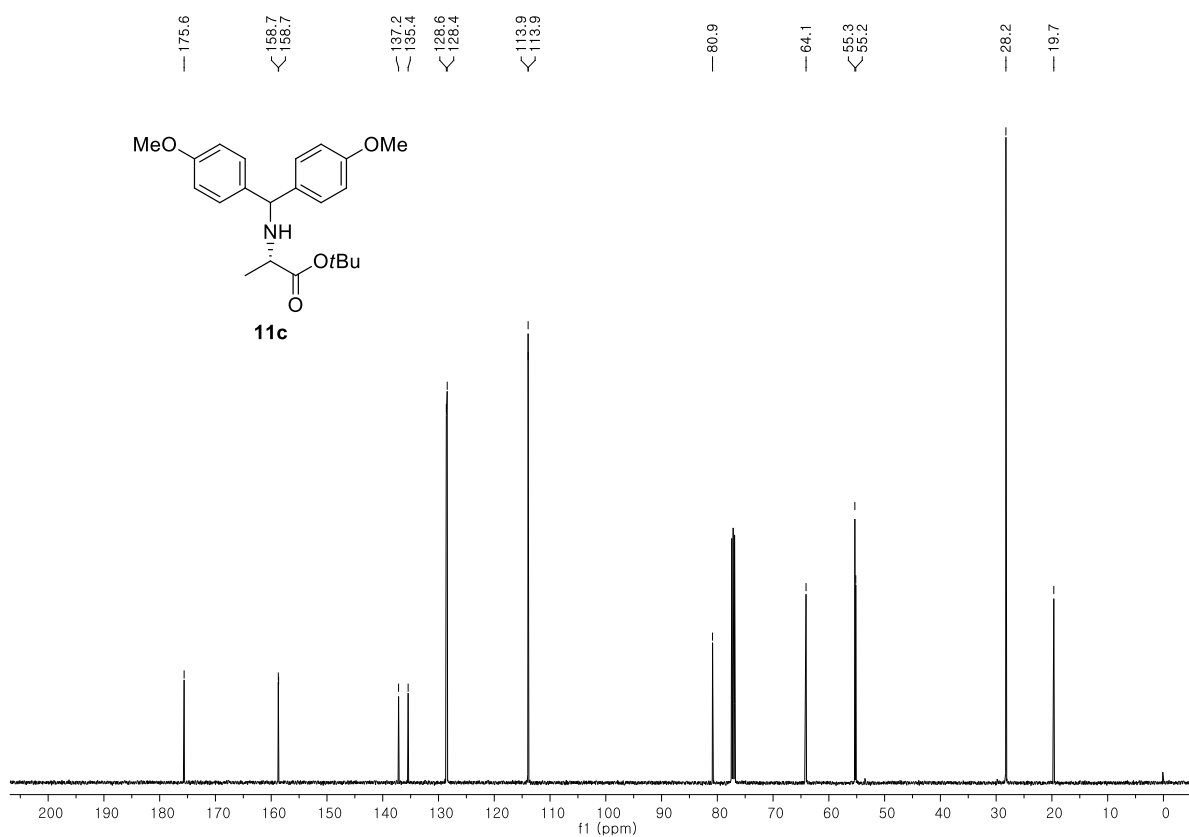

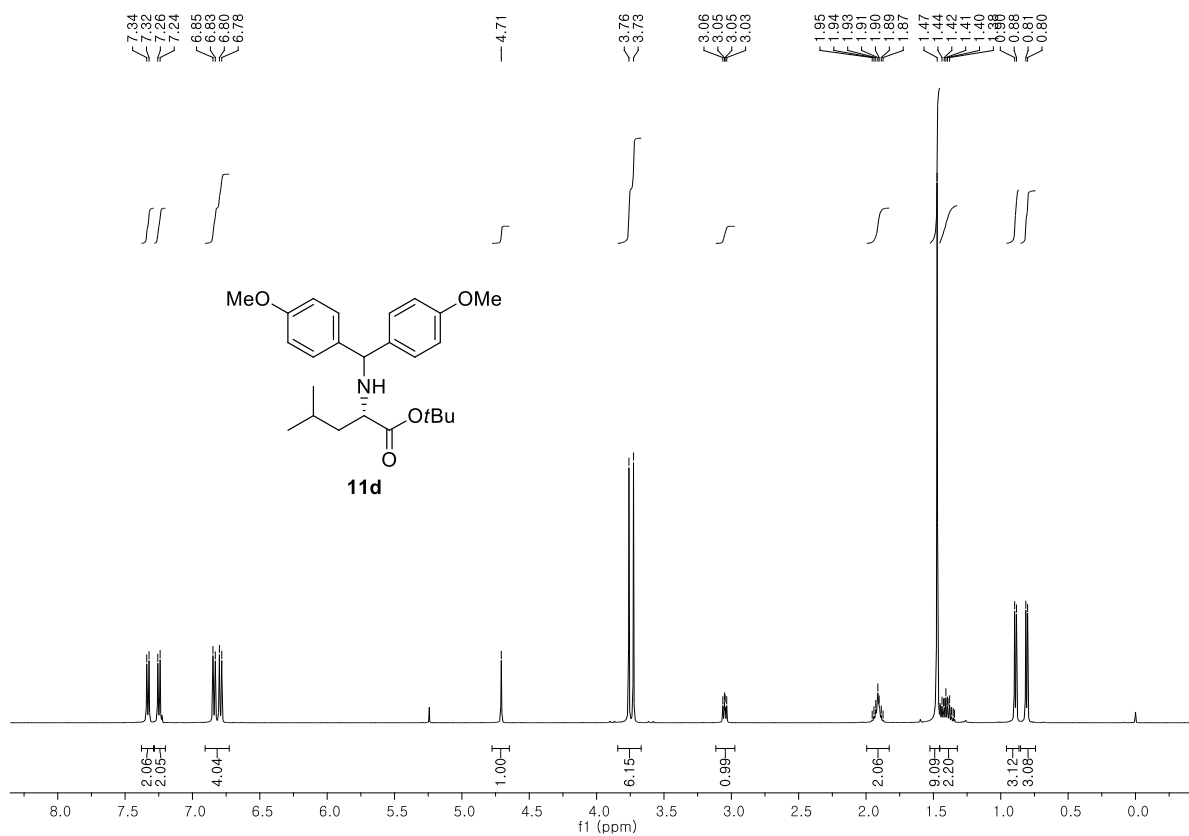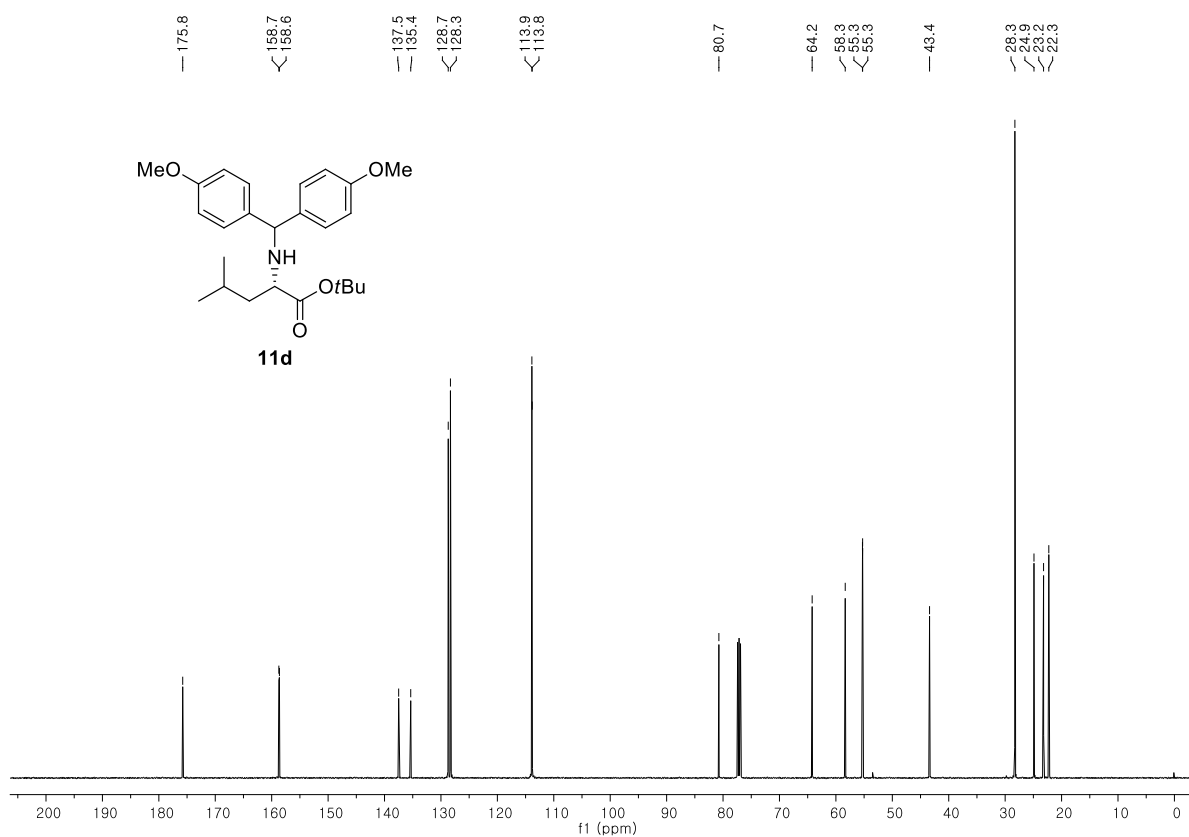

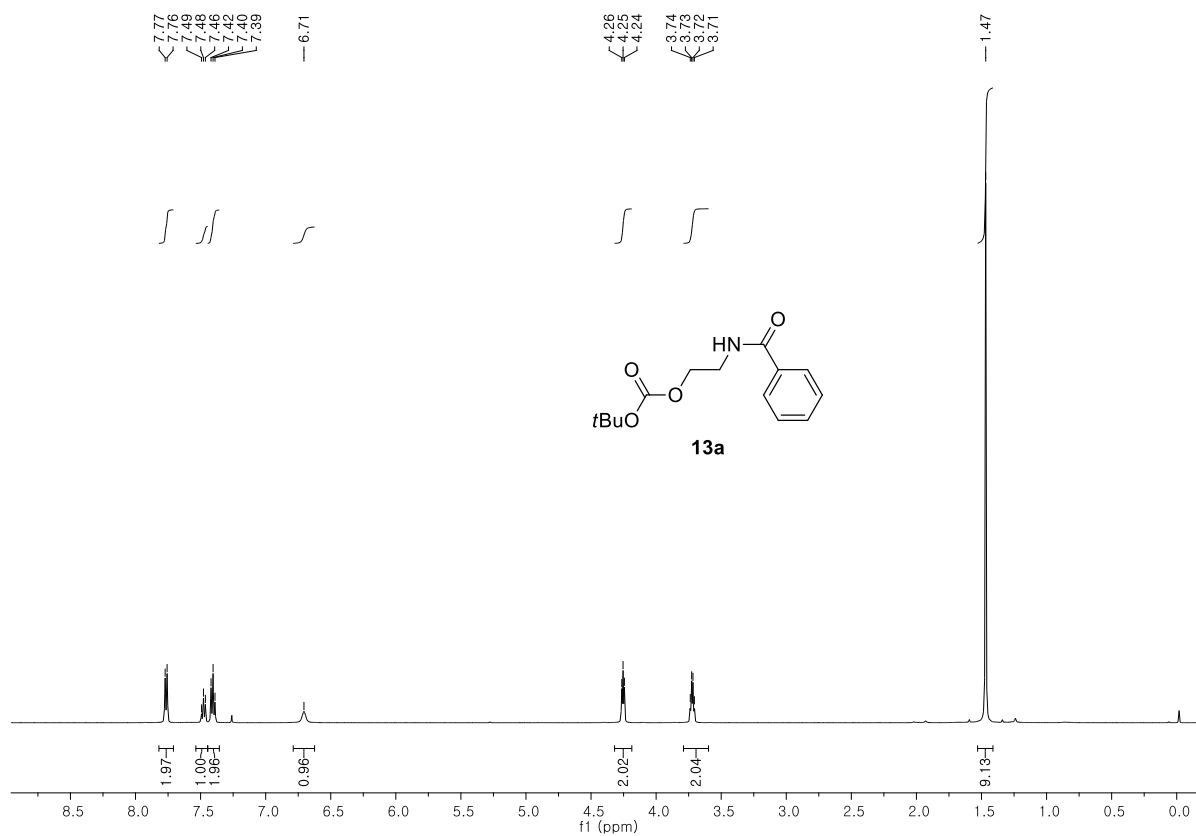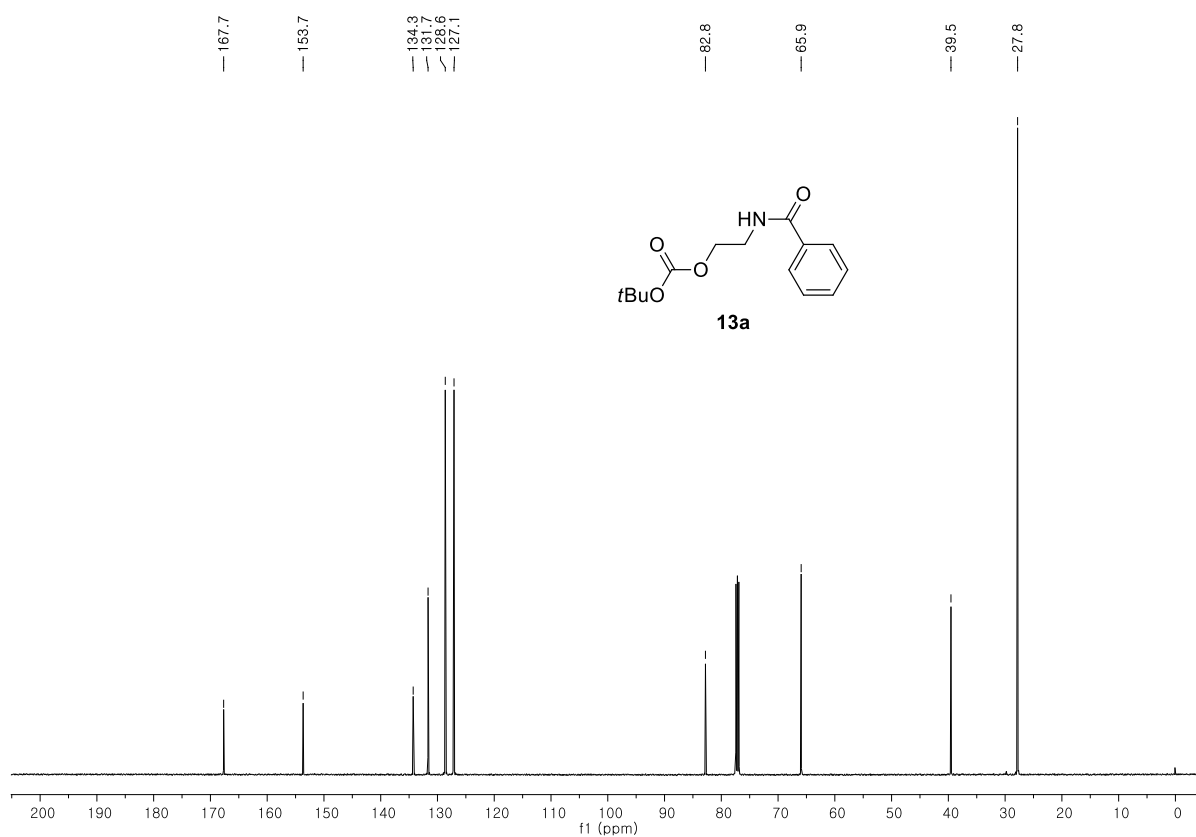

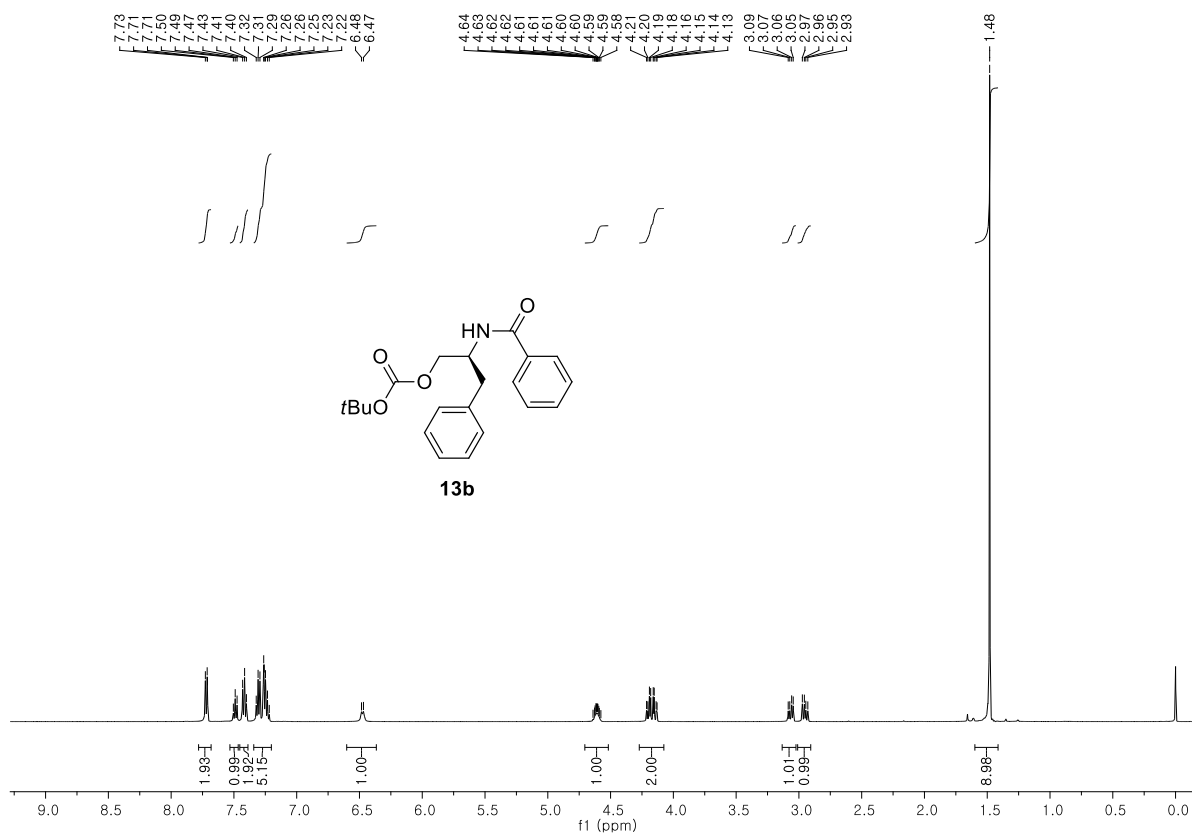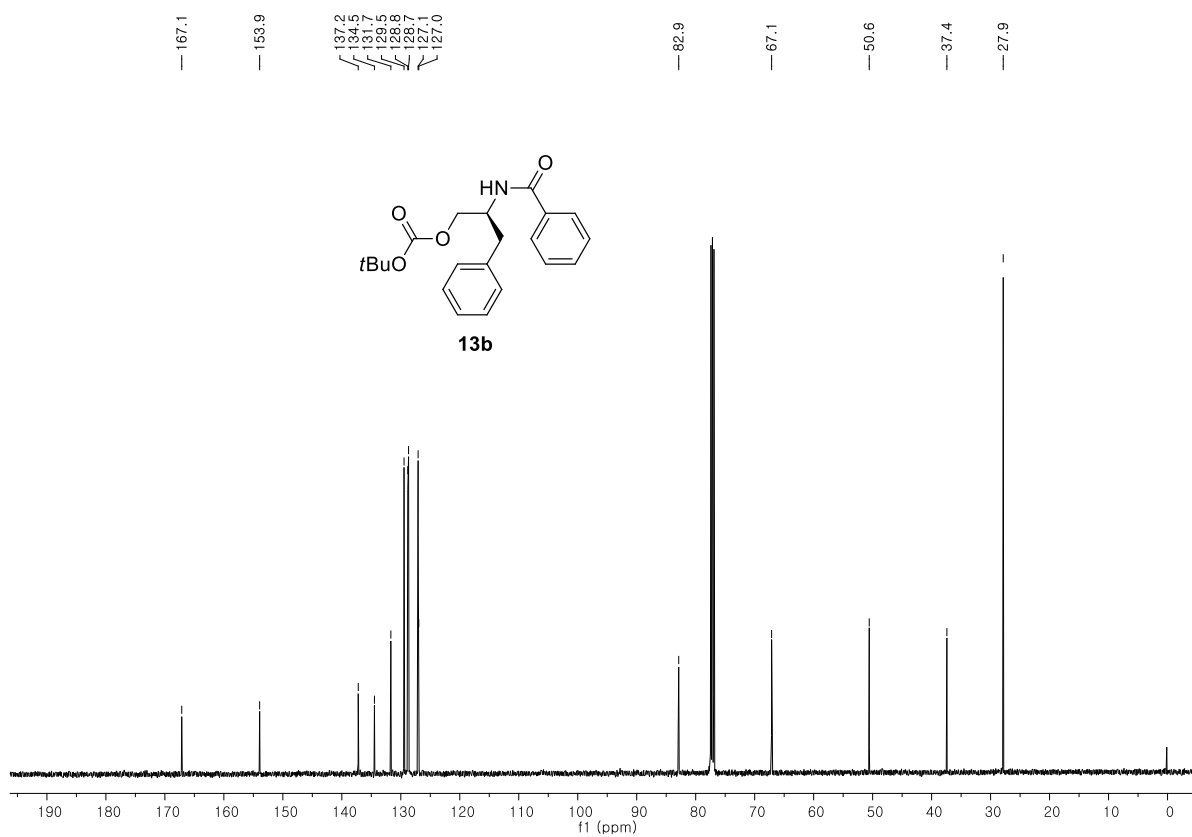

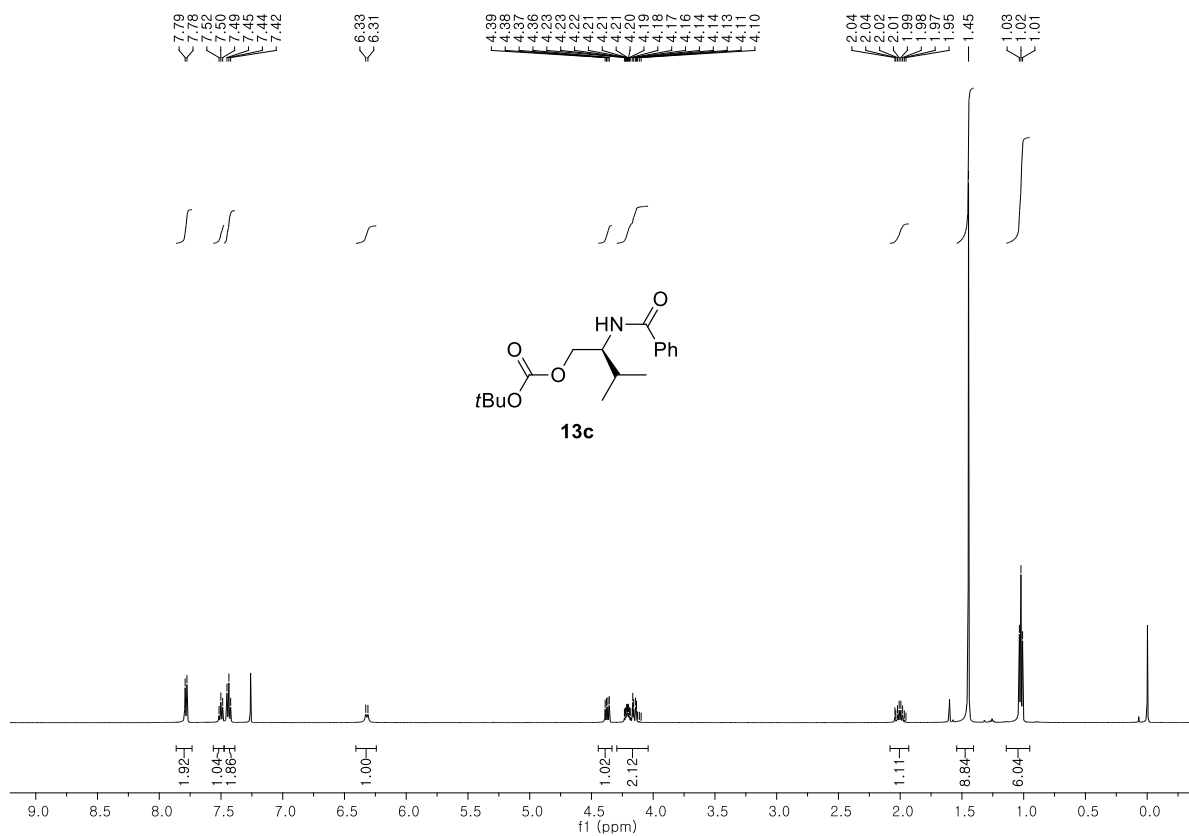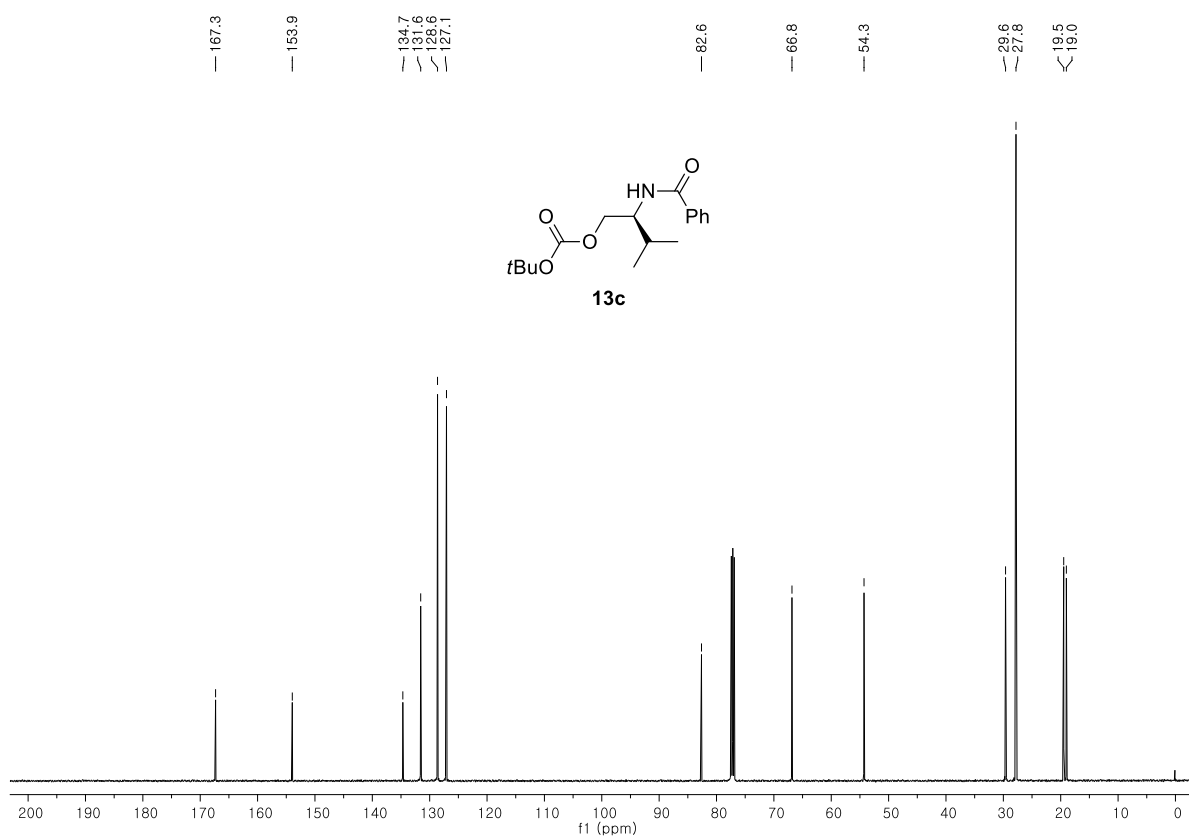

## HPLC spectra of *N*-protected amino acid *t*-butyl esters

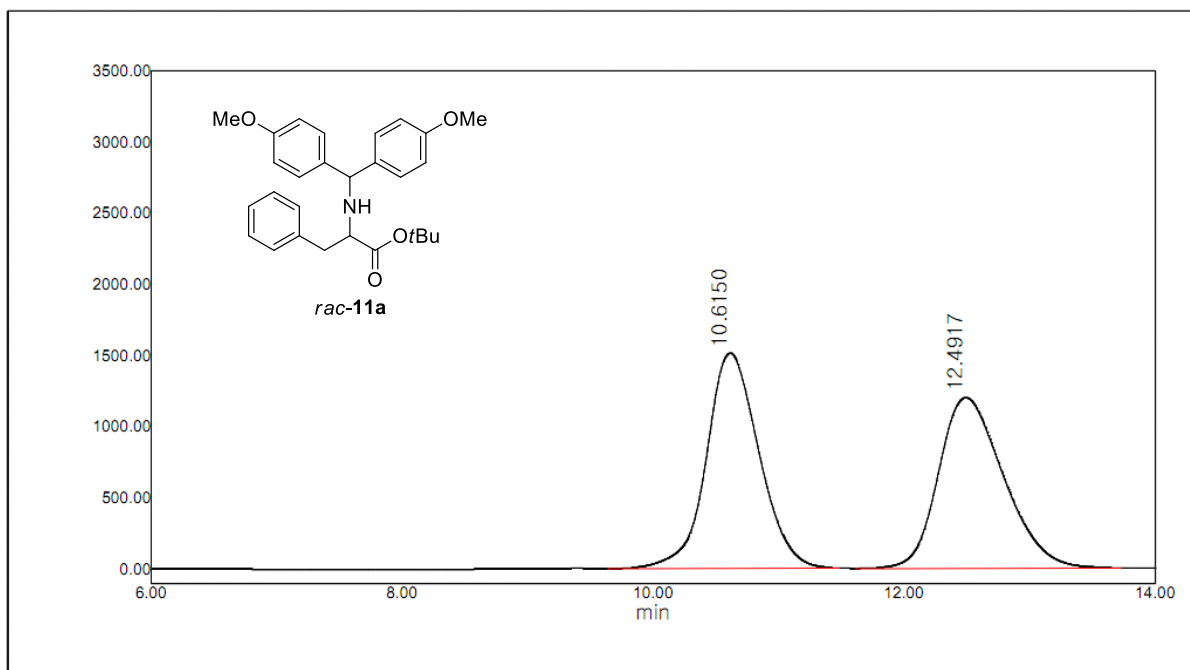

| Peak # | Time(min.) | Area(%) |
|--------|------------|---------|
| 1      | 10.6150    | 50.57   |
| 2      | 12.4917    | 49.43   |
|        |            |         |

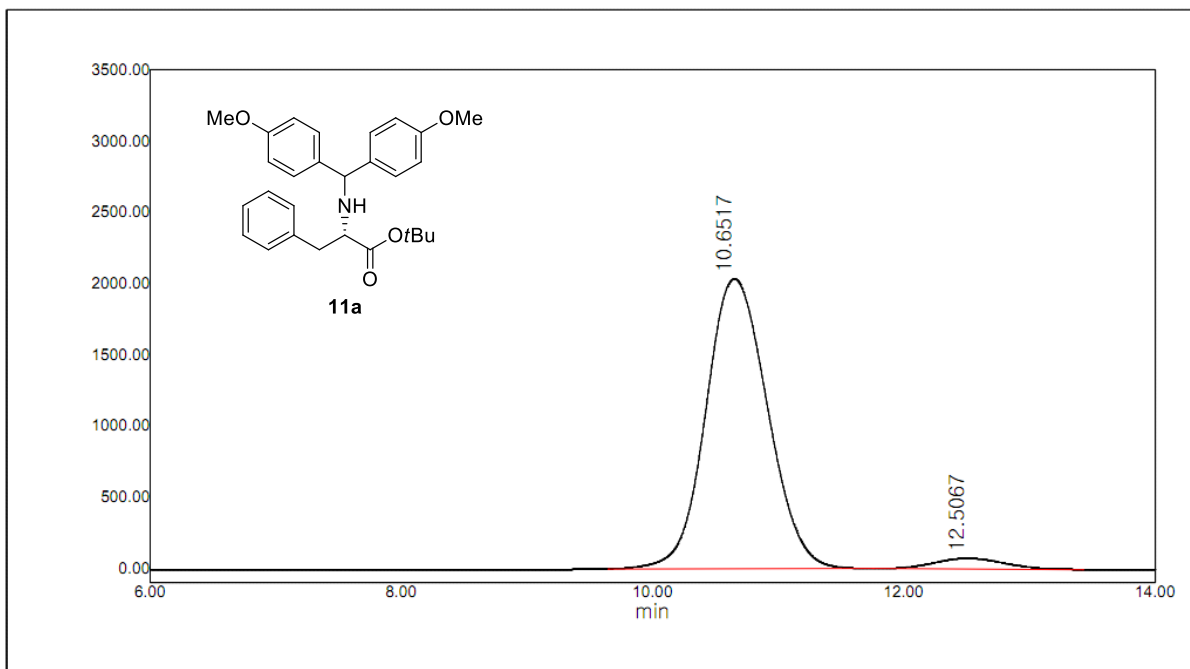

| Peak # | Time(min.) | Area(%) |
|--------|------------|---------|
| 1      | 10.6517    | 96.01   |
| 2      | 12.5067    | 3.99    |
|        |            |         |

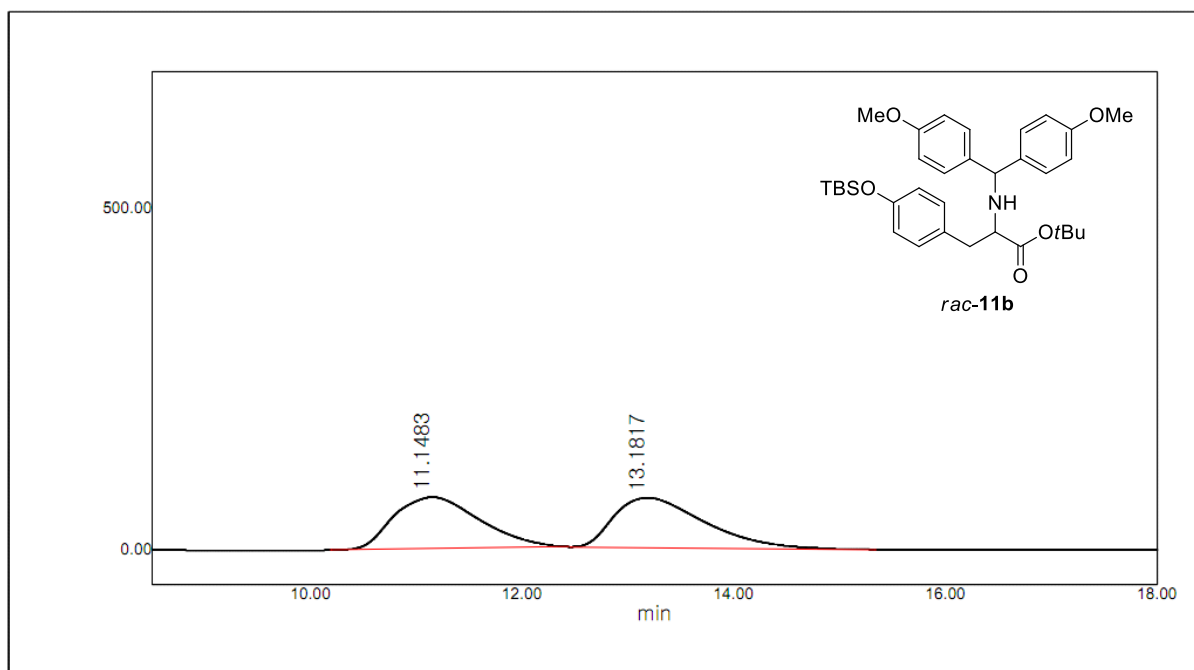

| Peak # | Time(min.) | Area(%) |
|--------|------------|---------|
| 1      | 11.1483    | 49.73   |
| 2      | 13.1817    | 50.27   |
|        |            |         |

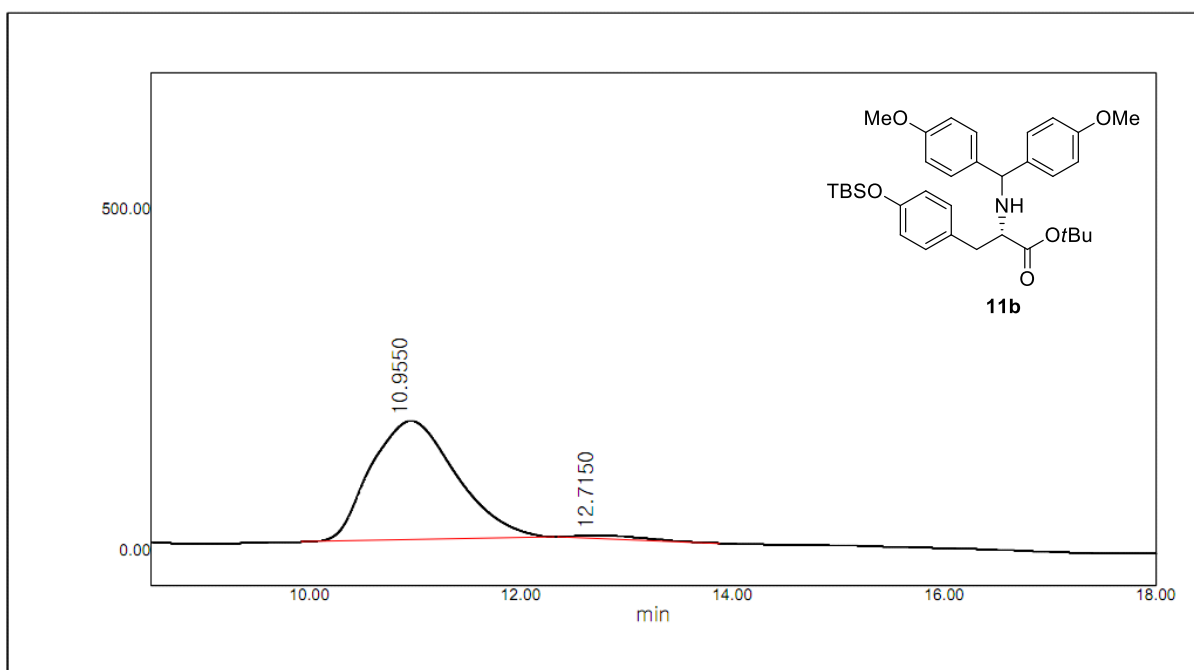

| Peak # | Time(min.) | Area(%) |
|--------|------------|---------|
| 1      | 10.9550    | 97.82   |
| 2      | 12.7150    | 2.18    |
|        |            |         |

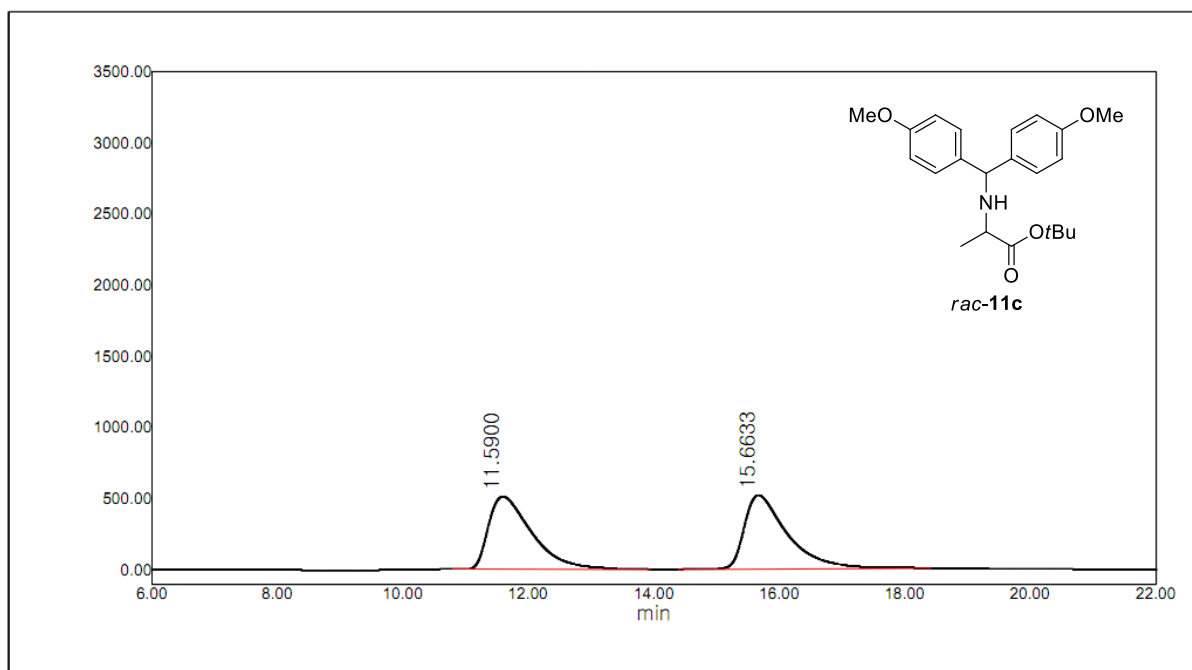

| Peak # | Time(min.) | Area(%) |
|--------|------------|---------|
| 1      | 11.5900    | 49.80   |
| 2      | 15.6633    | 50.20   |

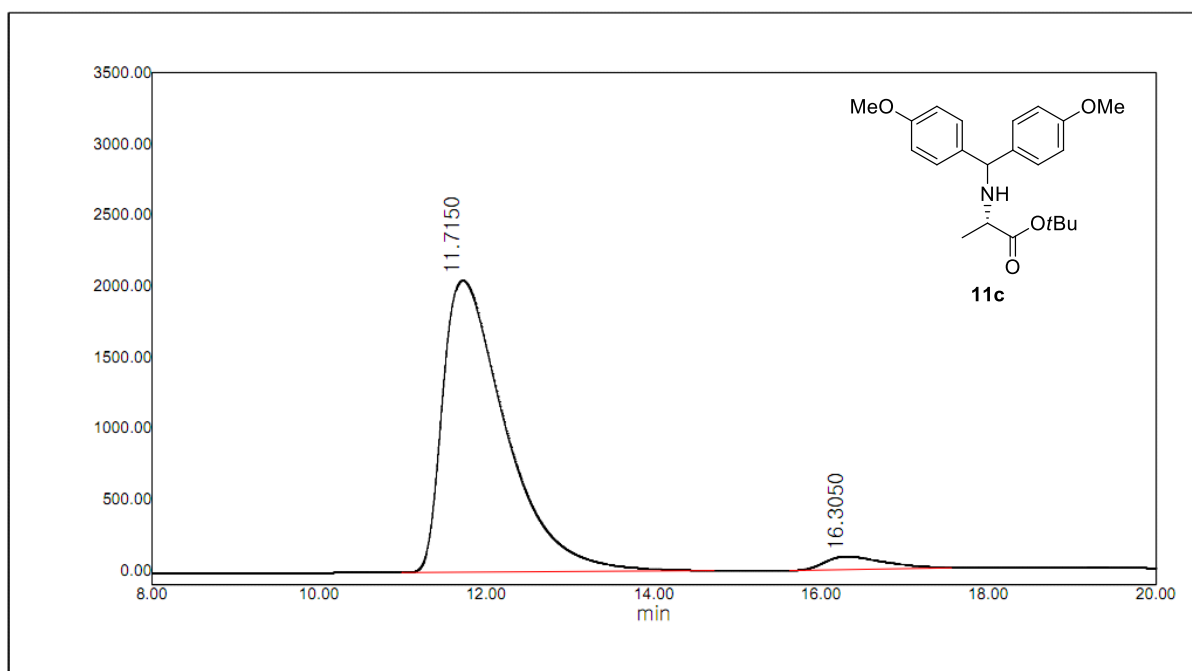

| Peak # | Time(min.) | Area(%) |
|--------|------------|---------|
| 1      | 11.7150    | 95.97   |
| 2      | 16.3050    | 4.03    |

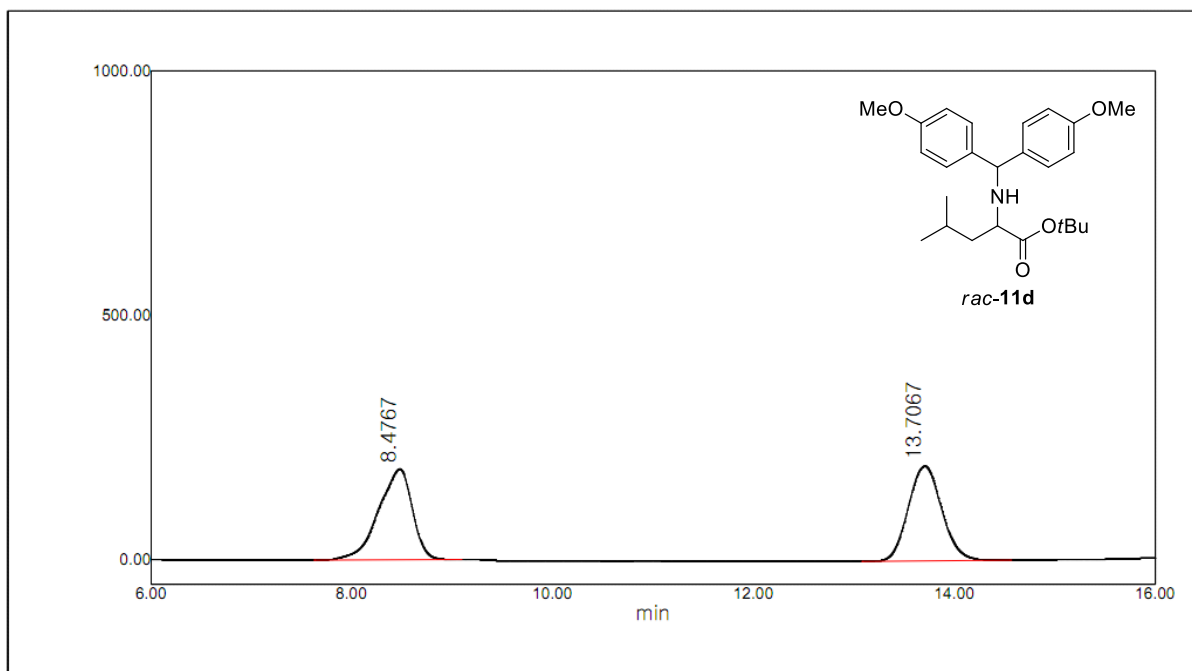

| Peak # | Time(min.) | Area(%) |
|--------|------------|---------|
| 1      | 8.4767     | 49.28   |
| 2      | 13.7067    | 50.72   |
|        |            |         |

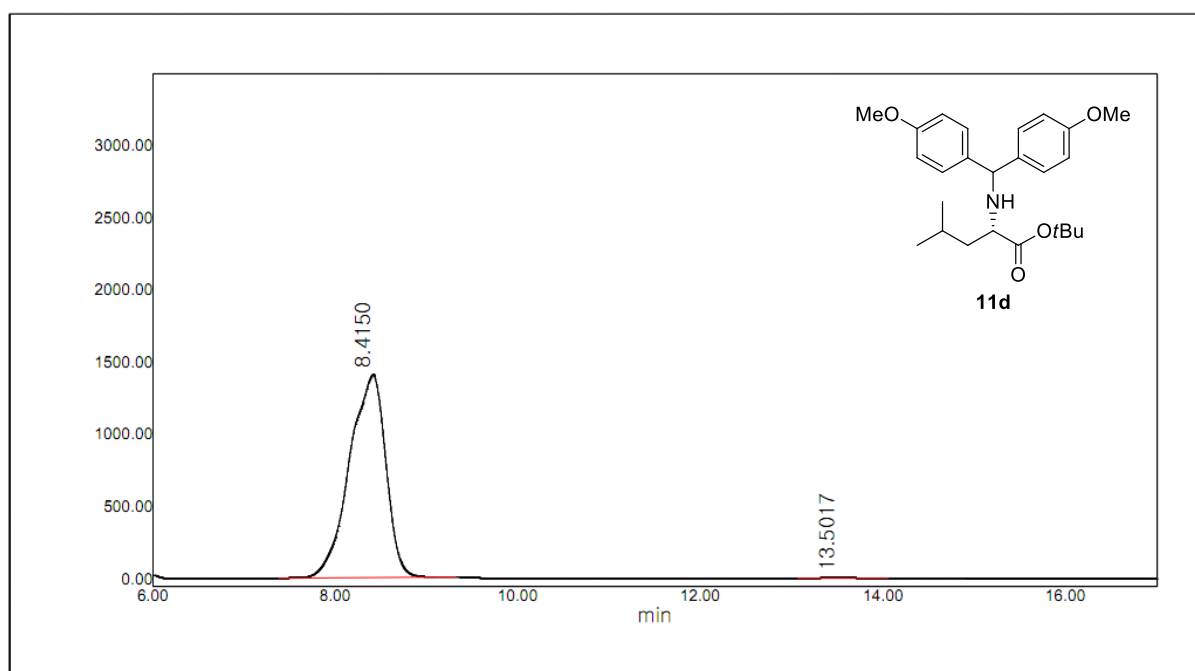

| Peak # | Time(min.) | Area(%) |
|--------|------------|---------|
| 1      | 8.4150     | 99.61   |
| 2      | 13.5017    | 0.39    |
|        |            |         |
